# Supplementary material for: Face matching in a long task: enforced rest and desk-switching cannot maintain identification accuracy
Source: PeerJ. 2015 Aug 18;3:e1184. doi: 10.7717/peerj.1184 (PMC4548491; doi:10.7717/peerj.1184)
Supplement: Supplemental Information 1 [file peerj-03-1184-s001.xlsx]

## Sheet: Experiment 1
Subject	Age	Sex	Block	Trial	CorrectAnswer	Lineup	Response	RTs
1	18	male	1	1	d	C2_033_DV_180.bmp	d	3154
1	18	male	1	2	s	C2_025_DV_025.bmp	s	3065
1	18	male	1	3	s	C2_040_DV_040.bmp	s	1842
1	18	male	1	4	d	C2_012_DV_205.bmp	d	2299
1	18	male	1	5	d	C2_004_DV_293.bmp	d	2819
1	18	male	1	6	s	C2_061_DV_061.bmp	s	2005
1	18	male	1	7	s	DV_062_C2_062.bmp	s	1362
1	18	male	1	8	d	C2_261_DV_201.bmp	s	2320
1	18	male	1	9	d	C2_039_DV_072.bmp	d	3705
1	18	male	1	10	s	C2_054_DV_054.bmp	d	2337
1	18	male	1	11	s	C2_017_DV_017.bmp	s	2294
1	18	male	1	12	s	DV_015_C2_015.bmp	s	2222
1	18	male	1	13	d	C2_041_DV_044.bmp	d	1336
1	18	male	1	14	d	C2_011_DV_049.bmp	s	1976
1	18	male	1	15	s	DV_046_C2_046.bmp	d	1381
1	18	male	1	16	s	C2_016_DV_016.bmp	d	1452
1	18	male	1	17	d	C2_024_DV_030.bmp	d	1644
1	18	male	1	18	d	DV_303_C2_217.bmp	d	1191
1	18	male	1	19	s	C2_035_DV_035.bmp	s	2648
1	18	male	1	20	d	C2_009_DV_033.bmp	s	2965
1	18	male	1	21	d	C2_050_DV_215.bmp	d	1154
1	18	male	1	22	s	C2_028_DV_028.bmp	s	2727
1	18	male	1	23	s	C2_031_DV_031.bmp	s	1261
1	18	male	1	24	d	C2_021_DV_087.bmp	d	1439
1	18	male	1	25	d	C2_018_DV_019.bmp	d	2288
1	18	male	1	26	s	C2_034_DV_034.bmp	d	2434
1	18	male	1	27	d	C2_010_DV_303.bmp	d	2636
1	18	male	1	28	s	C2_036_DV_036.bmp	d	2060
1	18	male	1	29	s	C2_014_DV_014.bmp	s	1432
1	18	male	1	30	d	C2_023_DV_304.bmp	d	1673
1	18	male	1	31	s	DV_029_C2_029.bmp	s	1563
1	18	male	1	32	d	C2_037_DV_085.bmp	d	1561
1	18	male	1	33	s	C2_056_DV_056.bmp	s	1884
1	18	male	1	34	d	DV_129_C2_092.bmp	d	2036
1	18	male	1	35	s	C2_007_DV_007.bmp	d	1464
1	18	male	1	36	d	C2_007_DV_097.bmp	d	819
1	18	male	1	37	s	C2_005_DV_005.bmp	d	1656
1	18	male	1	38	d	C2_051_DV_238.bmp	d	1803
1	18	male	1	39	d	C2_038_DV_081.bmp	s	1645
1	18	male	1	40	s	C2_043_DV_043.bmp	s	1167
1	18	male	2	1	d	C2_174_DV_183.bmp	d	1565
1	18	male	2	2	s	C2_080_DV_080.bmp	d	1657
1	18	male	2	3	d	C2_123_DV_223.bmp	s	1473
1	18	male	2	4	d	C2_117_DV_219.bmp	s	1252
1	18	male	2	5	s	C2_102_DV_102.bmp	d	3900
1	18	male	2	6	s	C2_084_DV_084.bmp	d	1499
1	18	male	2	7	d	C2_070_DV_012.bmp	d	1685
1	18	male	2	8	d	C2_211_DV_128.bmp	d	2558
1	18	male	2	9	d	C2_182_DV_184.bmp	d	5193
1	18	male	2	10	s	DV_104_C2_104.bmp	s	1246
1	18	male	2	11	s	C2_069_DV_069.bmp	d	1368
1	18	male	2	12	s	DV_086_C2_086.bmp	d	1421
1	18	male	2	13	s	C2_063_DV_063.bmp	s	2712
1	18	male	2	14	s	C2_068_DV_068.bmp	s	1657
1	18	male	2	15	d	C2_091_DV_283.bmp	d	1561
1	18	male	2	16	s	C2_082_DV_082.bmp	s	1534
1	18	male	2	17	d	C2_171_DV_185.bmp	s	1520
1	18	male	2	18	d	C2_139_DV_120.bmp	s	1613
1	18	male	2	19	s	C2_065_DV_065.bmp	d	1122
1	18	male	2	20	s	C2_078_DV_078.bmp	d	2592
1	18	male	2	21	s	C2_079_DV_079.bmp	d	1438
1	18	male	2	22	d	C2_002_DV_041.bmp	d	1512
1	18	male	2	23	d	C2_206_DV_077.bmp	d	928
1	18	male	2	24	s	C2_066_DV_066.bmp	d	1341
1	18	male	2	25	d	C2_143_DV_254.bmp	d	1749
1	18	male	2	26	s	C2_101_DV_101.bmp	d	4067
1	18	male	2	27	s	DV_103_C2_103.bmp	s	2061
1	18	male	2	28	d	C2_076_DV_051.bmp	d	3181
1	18	male	2	29	d	C2_057_DV_067.bmp	d	2252
1	18	male	2	30	s	DV_100_C2_100.bmp	d	2358
1	18	male	2	31	d	C2_095_DV_229.bmp	d	1411
1	18	male	2	32	d	C2_218_DV_109.bmp	d	1349
1	18	male	2	33	d	C2_098_DV_024.bmp	d	1485
1	18	male	2	34	d	C2_055_DV_059.bmp	s	1686
1	18	male	2	35	s	C2_071_DV_071.bmp	s	1797
1	18	male	2	36	s	DV_089_C2_089.bmp	d	1632
1	18	male	2	37	s	DV_064_C2_064.bmp	d	1187
1	18	male	2	38	d	C2_108_DV_282.bmp	d	2344
1	18	male	2	39	s	C2_073_DV_073.bmp	s	1430
1	18	male	2	40	d	C2_092_DV_227.bmp	d	1186
1	18	male	3	1	s	C2_113_DV_113.bmp	s	1876
1	18	male	3	2	d	DV_009_C2_180.bmp	d	1871
1	18	male	3	3	d	DV_037_C2_303.bmp	d	992
1	18	male	3	4	s	C2_146_DV_146.bmp	d	1998
1	18	male	3	5	d	C2_003_DV_018.bmp	d	1754
1	18	male	3	6	d	C2_252_DV_125.bmp	d	1744
1	18	male	3	7	d	DV_020_C2_090.bmp	d	1189
1	18	male	3	8	d	DV_012_C2_205.bmp	d	1699
1	18	male	3	9	d	C2_304_DV_099.bmp	d	1771
1	18	male	3	10	s	C2_144_DV_144.bmp	d	1527
1	18	male	3	11	d	C2_239_DV_114.bmp	d	2222
1	18	male	3	12	d	C2_289_DV_039.bmp	d	2882
1	18	male	3	13	s	C2_152_DV_152.bmp	d	1467
1	18	male	3	14	s	DV_147_C2_147.bmp	d	2669
1	18	male	3	15	d	C2_223_DV_242.bmp	d	1207
1	18	male	3	16	d	C2_249_DV_083.bmp	d	1442
1	18	male	3	17	s	C2_119_DV_119.bmp	d	1719
1	18	male	3	18	s	C2_115_DV_115.bmp	d	2423
1	18	male	3	19	d	C2_261_DV_287.bmp	s	1226
1	18	male	3	20	s	C2_140_DV_140.bmp	s	1501
1	18	male	3	21	d	C2_232_DV_048.bmp	d	1807
1	18	male	3	22	d	C2_242_DV_246.bmp	d	1385
1	18	male	3	23	d	DV_024_C2_085.bmp	s	1200
1	18	male	3	24	d	DV_032_C2_153.bmp	d	4035
1	18	male	3	25	s	DV_111_C2_111.bmp	d	1119
1	18	male	3	26	s	C2_142_DV_142.bmp	d	1247
1	18	male	3	27	d	C2_240_DV_044.bmp	s	1531
1	18	male	3	28	s	C2_116_DV_116.bmp	d	1968
1	18	male	3	29	s	C2_131_DV_131.bmp	d	1421
1	18	male	3	30	s	C2_112_DV_112.bmp	d	1306
1	18	male	3	31	s	C2_105_DV_105.bmp	d	3122
1	18	male	3	32	s	DV_118_C2_118.bmp	d	2033
1	18	male	3	33	s	C2_134_DV_134.bmp	d	2508
1	18	male	3	34	s	DV_141_C2_141.bmp	d	2076
1	18	male	3	35	d	DV_013_C2_235.bmp	d	2302
1	18	male	3	36	s	DV_127_C2_127.bmp	s	1805
1	18	male	3	37	d	C2_246_DV_160.bmp	s	2514
1	18	male	3	38	s	DV_137_C2_137.bmp	s	1687
1	18	male	3	39	s	C2_124_DV_124.bmp	s	2298
1	18	male	3	40	d	C2_266_DV_227.bmp	d	1377
1	18	male	4	1	d	DV_114_C2_126.bmp	d	1348
1	18	male	4	2	s	C2_158_DV_158.bmp	s	1515
1	18	male	4	3	d	DV_048_C2_175.bmp	d	2529
1	18	male	4	4	s	DV_161_C2_161.bmp	d	2219
1	18	male	4	5	d	DV_178_C2_060.bmp	d	1526
1	18	male	4	6	s	C2_155_DV_155.bmp	d	1519
1	18	male	4	7	s	DV_166_C2_166.bmp	s	1693
1	18	male	4	8	d	DV_091_C2_211.bmp	d	1854
1	18	male	4	9	d	DV_130_C2_253.bmp	d	1013
1	18	male	4	10	d	DV_109_C2_268.bmp	d	1529
1	18	male	4	11	d	DV_074_C2_075.bmp	d	1256
1	18	male	4	12	d	DV_108_C2_038.bmp	d	1491
1	18	male	4	13	s	C2_194_DV_194.bmp	d	1774
1	18	male	4	14	s	C2_157_DV_157.bmp	d	1699
1	18	male	4	15	d	DV_039_C2_296.bmp	d	938
1	18	male	4	16	d	DV_120_C2_133.bmp	s	1906
1	18	male	4	17	d	DV_053_C2_208.bmp	d	1562
1	18	male	4	18	d	DV_160_C2_154.bmp	d	1757
1	18	male	4	19	s	DV_204_C2_204.bmp	s	2230
1	18	male	4	20	s	C2_226_DV_226.bmp	s	1561
1	18	male	4	21	s	DV_222_C2_222.bmp	d	1357
1	18	male	4	22	d	DV_126_C2_076.bmp	d	1405
1	18	male	4	23	d	DV_132_C2_210.bmp	d	1145
1	18	male	4	24	s	C2_243_DV_243.bmp	d	1279
1	18	male	4	25	s	C2_247_DV_247.bmp	d	1194
1	18	male	4	26	s	DV_190_C2_190.bmp	d	1387
1	18	male	4	27	d	DV_081_C2_282.bmp	d	929
1	18	male	4	28	d	DV_129_C2_199.bmp	d	1873
1	18	male	4	29	s	DV_167_C2_167.bmp	s	1393
1	18	male	4	30	d	DV_088_C2_295.bmp	s	1142
1	18	male	4	31	s	DV_214_C2_214.bmp	s	1437
1	18	male	4	32	s	C2_207_DV_207.bmp	d	1777
1	18	male	4	33	s	DV_200_C2_200.bmp	d	5318
1	18	male	4	34	d	DV_094_C2_022.bmp	d	2245
1	18	male	4	35	s	C2_181_Dv_181.bmp	d	1240
1	18	male	4	36	s	DV_248_C2_248.bmp	d	1586
1	18	male	4	37	d	DV_045_C2_027.bmp	d	1071
1	18	male	4	38	s	C2_172_DV_172.bmp	d	1496
1	18	male	4	39	d	DV_052_C2_264.bmp	d	1160
1	18	male	4	40	s	DV_231_C2_231.bmp	d	1116
1	18	male	5	1	d	DV_133_C2_139.bmp	d	1213
1	18	male	5	2	s	C2_271_DV_271.bmp	d	1695
1	18	male	5	3	d	DV_237_C2_297.bmp	d	1600
1	18	male	5	4	d	DV_219_C2_135.bmp	d	1540
1	18	male	5	5	d	DV_208_C2_183.bmp	d	1196
1	18	male	5	6	s	C2_302_DV_302.bmp	d	2409
1	18	male	5	7	d	DV_132_C2_168.bmp	d	2254
1	18	male	5	8	s	DV_300_C2_300.bmp	d	1696
1	18	male	5	9	d	DV_254_C2_287.bmp	d	1880
1	18	male	5	10	d	DV_178_C2_099.bmp	d	1216
1	18	male	5	11	s	DV_259_C2_259.bmp	d	1229
1	18	male	5	12	s	DV_286_C2_286.bmp	s	2037
1	18	male	5	13	s	DV_265_C2_265.bmp	d	2201
1	18	male	5	14	s	DV_284_C2_284.bmp	d	1660
1	18	male	5	15	s	C2_290_DV_290.bmp	d	2125
1	18	male	5	16	d	DV_280_C2_003.bmp	d	1262
1	18	male	5	17	s	C2_257_DV_257.bmp	d	1463
1	18	male	5	18	d	DV_295_C2_216.bmp	d	2154
1	18	male	5	19	s	C2_278_DV_278.bmp	d	1391
1	18	male	5	20	s	C2_288_DV_288.bmp	d	1165
1	18	male	5	21	d	DV_203_C2_277.bmp	d	6176
1	18	male	5	22	d	DV_170_C2_270.bmp	d	964
1	18	male	5	23	s	DV_298_C2_298.bmp	d	1291
1	18	male	5	24	d	DV_154_C2_042.bmp	d	2060
1	18	male	5	25	d	C2_008_DV_039.bmp	d	1815
1	18	male	5	26	s	DV_299_C2_299.bmp	d	1610
1	18	male	5	27	s	C2_258_DV_258.bmp	d	1366
1	18	male	5	28	d	DV_199_C2_125.bmp	d	917
1	18	male	5	29	s	C2_291_DV_291.bmp	d	1420
1	18	male	5	30	d	C2_083_DV_108.bmp	d	1190
1	18	male	5	31	s	C2_294_DV_294.bmp	s	2035
1	18	male	5	32	d	DV_244_C2_042.bmp	d	1528
1	18	male	5	33	s	C2_256_DV_256.bmp	d	2150
1	18	male	5	34	d	DV_296_C2_235.bmp	d	1268
1	18	male	5	35	s	DV_267_C2_267.bmp	s	1620
1	18	male	5	36	d	DV_277_C2_110.bmp	d	1672
1	18	male	5	37	d	DV_217_C2_185.bmp	d	1290
1	18	male	5	38	s	DV_274_C2_274.bmp	d	1420
1	18	male	5	39	d	DV_238_C2_218.bmp	d	2294
1	18	male	5	40	s	C2_260_DV_260.bmp	s	1503
1	18	male	6	1	d	C2_261_DV_201.bmp	s	2429
1	18	male	6	2	s	C2_054_DV_054.bmp	d	3546
1	18	male	6	3	d	C2_024_DV_030.bmp	s	1843
1	18	male	6	4	s	DV_046_C2_046.bmp	d	1281
1	18	male	6	5	d	DV_303_C2_217.bmp	d	1156
1	18	male	6	6	d	DV_129_C2_092.bmp	d	997
1	18	male	6	7	d	C2_038_DV_081.bmp	d	1507
1	18	male	6	8	d	C2_023_DV_304.bmp	d	1462
1	18	male	6	9	s	C2_061_DV_061.bmp	s	1746
1	18	male	6	10	d	C2_050_DV_215.bmp	d	1387
1	18	male	6	11	s	C2_025_DV_025.bmp	d	1170
1	18	male	6	12	d	C2_041_DV_044.bmp	d	1314
1	18	male	6	13	s	C2_043_DV_043.bmp	s	1076
1	18	male	6	14	s	C2_036_DV_036.bmp	d	1728
1	18	male	6	15	d	C2_010_DV_303.bmp	s	1105
1	18	male	6	16	s	C2_017_DV_017.bmp	s	1788
1	18	male	6	17	s	C2_014_DV_014.bmp	d	3075
1	18	male	6	18	s	DV_062_C2_062.bmp	s	1327
1	18	male	6	19	s	C2_005_DV_005.bmp	s	993
1	18	male	6	20	d	C2_021_DV_087.bmp	d	1737
1	18	male	6	21	d	C2_051_DV_238.bmp	d	2082
1	18	male	6	22	s	C2_028_DV_028.bmp	d	2046
1	18	male	6	23	d	C2_012_DV_205.bmp	d	1601
1	18	male	6	24	s	C2_056_DV_056.bmp	s	2128
1	18	male	6	25	d	C2_039_DV_072.bmp	d	1426
1	18	male	6	26	d	C2_018_DV_019.bmp	d	1320
1	18	male	6	27	s	C2_040_DV_040.bmp	s	1090
1	18	male	6	28	s	C2_035_DV_035.bmp	s	3573
1	18	male	6	29	d	C2_033_DV_180.bmp	d	1517
1	18	male	6	30	s	C2_016_DV_016.bmp	d	1575
1	18	male	6	31	s	C2_007_DV_007.bmp	d	1135
1	18	male	6	32	d	C2_007_DV_097.bmp	s	1761
1	18	male	6	33	d	C2_011_DV_049.bmp	s	1922
1	18	male	6	34	s	DV_029_C2_029.bmp	d	1083
1	18	male	6	35	d	C2_004_DV_293.bmp	d	1086
1	18	male	6	36	s	C2_034_DV_034.bmp	d	1850
1	18	male	6	37	d	C2_037_DV_085.bmp	s	2878
1	18	male	6	38	s	DV_015_C2_015.bmp	s	1306
1	18	male	6	39	s	C2_031_DV_031.bmp	s	1108
1	18	male	6	40	d	C2_009_DV_033.bmp	s	1599
1	18	male	7	1	d	C2_108_DV_282.bmp	d	1166
1	18	male	7	2	s	DV_100_C2_100.bmp	d	1222
1	18	male	7	3	s	C2_066_DV_066.bmp	s	1276
1	18	male	7	4	d	C2_182_DV_184.bmp	d	1512
1	18	male	7	5	s	C2_084_DV_084.bmp	d	1530
1	18	male	7	6	s	C2_078_DV_078.bmp	d	1243
1	18	male	7	7	s	C2_080_DV_080.bmp	d	1136
1	18	male	7	8	s	C2_068_DV_068.bmp	s	1209
1	18	male	7	9	s	DV_103_C2_103.bmp	d	1656
1	18	male	7	10	s	C2_069_DV_069.bmp	d	2741
1	18	male	7	11	s	C2_082_DV_082.bmp	d	1334
1	18	male	7	12	d	C2_098_DV_024.bmp	d	1640
1	18	male	7	13	d	C2_095_DV_229.bmp	d	1541
1	18	male	7	14	s	C2_065_DV_065.bmp	d	911
1	18	male	7	15	d	C2_092_DV_227.bmp	d	1097
1	18	male	7	16	s	DV_104_C2_104.bmp	s	2140
1	18	male	7	17	d	C2_206_DV_077.bmp	d	1349
1	18	male	7	18	s	C2_071_DV_071.bmp	d	1309
1	18	male	7	19	s	C2_079_DV_079.bmp	d	1064
1	18	male	7	20	d	C2_091_DV_283.bmp	d	2588
1	18	male	7	21	d	C2_076_DV_051.bmp	s	1244
1	18	male	7	22	s	C2_102_DV_102.bmp	s	1465
1	18	male	7	23	s	DV_089_C2_089.bmp	d	2189
1	18	male	7	24	d	C2_055_DV_059.bmp	s	2292
1	18	male	7	25	d	C2_117_DV_219.bmp	s	1744
1	18	male	7	26	d	C2_139_DV_120.bmp	d	1593
1	18	male	7	27	s	C2_073_DV_073.bmp	d	1313
1	18	male	7	28	d	C2_002_DV_041.bmp	d	1314
1	18	male	7	29	s	C2_063_DV_063.bmp	d	3020
1	18	male	7	30	s	DV_086_C2_086.bmp	d	1322
1	18	male	7	31	d	C2_057_DV_067.bmp	s	1708
1	18	male	7	32	d	C2_171_DV_185.bmp	d	1431
1	18	male	7	33	d	C2_218_DV_109.bmp	d	1524
1	18	male	7	34	d	C2_070_DV_012.bmp	d	1358
1	18	male	7	35	d	C2_123_DV_223.bmp	d	1343
1	18	male	7	36	d	C2_143_DV_254.bmp	d	1584
1	18	male	7	37	d	C2_174_DV_183.bmp	s	1160
1	18	male	7	38	s	DV_064_C2_064.bmp	s	1913
1	18	male	7	39	d	C2_211_DV_128.bmp	d	2010
1	18	male	7	40	s	C2_101_DV_101.bmp	s	1512
1	18	male	8	1	d	C2_003_DV_018.bmp	d	1899
1	18	male	8	2	s	DV_118_C2_118.bmp	d	1189
1	18	male	8	3	s	C2_112_DV_112.bmp	d	1437
1	18	male	8	4	d	DV_020_C2_090.bmp	s	1490
1	18	male	8	5	d	DV_032_C2_153.bmp	d	1278
1	18	male	8	6	d	C2_249_DV_083.bmp	d	2057
1	18	male	8	7	d	DV_013_C2_235.bmp	d	1430
1	18	male	8	8	s	DV_127_C2_127.bmp	s	859
1	18	male	8	9	s	DV_137_C2_137.bmp	s	1304
1	18	male	8	10	d	DV_024_C2_085.bmp	d	2427
1	18	male	8	11	d	DV_009_C2_180.bmp	d	2616
1	18	male	8	12	d	C2_240_DV_044.bmp	d	942
1	18	male	8	13	s	C2_105_DV_105.bmp	d	2527
1	18	male	8	14	s	C2_146_DV_146.bmp	d	1113
1	18	male	8	15	d	C2_261_DV_287.bmp	d	1219
1	18	male	8	16	d	DV_037_C2_303.bmp	d	1113
1	18	male	8	17	s	C2_115_DV_115.bmp	s	1475
1	18	male	8	18	s	DV_147_C2_147.bmp	s	1183
1	18	male	8	19	s	C2_113_DV_113.bmp	s	1342
1	18	male	8	20	s	C2_140_DV_140.bmp	d	1232
1	18	male	8	21	s	C2_134_DV_134.bmp	d	1549
1	18	male	8	22	d	C2_304_DV_099.bmp	d	1261
1	18	male	8	23	d	C2_289_DV_039.bmp	d	1497
1	18	male	8	24	d	C2_223_DV_242.bmp	d	1892
1	18	male	8	25	s	C2_116_DV_116.bmp	s	1431
1	18	male	8	26	d	C2_232_DV_048.bmp	d	1445
1	18	male	8	27	s	C2_152_DV_152.bmp	d	2273
1	18	male	8	28	d	C2_266_DV_227.bmp	d	1549
1	18	male	8	29	s	C2_144_DV_144.bmp	d	1358
1	18	male	8	30	s	DV_141_C2_141.bmp	d	1383
1	18	male	8	31	s	C2_119_DV_119.bmp	s	6326
1	18	male	8	32	s	DV_111_C2_111.bmp	s	2632
1	18	male	8	33	s	C2_142_DV_142.bmp	d	3101
1	18	male	8	34	d	DV_012_C2_205.bmp	d	1224
1	18	male	8	35	s	C2_124_DV_124.bmp	d	2326
1	18	male	8	36	d	C2_252_DV_125.bmp	d	1248
1	18	male	8	37	d	C2_239_DV_114.bmp	d	2813
1	18	male	8	38	d	C2_246_DV_160.bmp	d	1715
1	18	male	8	39	s	C2_131_DV_131.bmp	s	2077
1	18	male	8	40	d	C2_242_DV_246.bmp	d	1369
1	18	male	9	1	s	C2_247_DV_247.bmp	d	1569
1	18	male	9	2	d	DV_039_C2_296.bmp	d	1016
1	18	male	9	3	d	DV_114_C2_126.bmp	s	2518
1	18	male	9	4	d	DV_045_C2_027.bmp	s	1992
1	18	male	9	5	d	DV_048_C2_175.bmp	d	1632
1	18	male	9	6	s	DV_161_C2_161.bmp	d	1037
1	18	male	9	7	s	C2_181_Dv_181.bmp	d	1347
1	18	male	9	8	s	C2_172_DV_172.bmp	s	1443
1	18	male	9	9	d	DV_074_C2_075.bmp	s	1817
1	18	male	9	10	d	DV_178_C2_060.bmp	d	2199
1	18	male	9	11	d	DV_130_C2_253.bmp	s	5789
1	18	male	9	12	d	DV_081_C2_282.bmp	d	3276
1	18	male	9	13	d	DV_160_C2_154.bmp	d	1808
1	18	male	9	14	s	DV_214_C2_214.bmp	d	2951
1	18	male	9	15	d	DV_094_C2_022.bmp	d	4040
1	18	male	9	16	d	DV_053_C2_208.bmp	d	1525
1	18	male	9	17	s	C2_243_DV_243.bmp	d	1295
1	18	male	9	18	s	C2_157_DV_157.bmp	d	4770
1	18	male	9	19	s	C2_194_DV_194.bmp	s	7241
1	18	male	9	20	s	C2_226_DV_226.bmp	d	3287
1	18	male	9	21	d	DV_091_C2_211.bmp	d	3314
1	18	male	9	22	d	DV_120_C2_133.bmp	d	1997
1	18	male	9	23	s	C2_155_DV_155.bmp	d	1907
1	18	male	9	24	d	DV_126_C2_076.bmp	s	2334
1	18	male	9	25	d	DV_132_C2_210.bmp	d	4239
1	18	male	9	26	d	DV_088_C2_295.bmp	d	1956
1	18	male	9	27	d	DV_052_C2_264.bmp	s	3261
1	18	male	9	28	s	DV_248_C2_248.bmp	d	3017
1	18	male	9	29	s	C2_207_DV_207.bmp	d	2207
1	18	male	9	30	s	DV_166_C2_166.bmp	s	2366
1	18	male	9	31	d	DV_108_C2_038.bmp	s	1230
1	18	male	9	32	d	DV_129_C2_199.bmp	d	1099
1	18	male	9	33	d	DV_109_C2_268.bmp	d	1510
1	18	male	9	34	s	DV_204_C2_204.bmp	d	1489
1	18	male	9	35	s	DV_200_C2_200.bmp	s	1155
1	18	male	9	36	s	DV_167_C2_167.bmp	s	1852
1	18	male	9	37	s	C2_158_DV_158.bmp	s	1129
1	18	male	9	38	s	DV_231_C2_231.bmp	s	2234
1	18	male	9	39	s	DV_190_C2_190.bmp	s	1448
1	18	male	9	40	s	DV_222_C2_222.bmp	s	1100
1	18	male	10	1	s	C2_271_DV_271.bmp	d	1127
1	18	male	10	2	d	DV_178_C2_099.bmp	d	985
1	18	male	10	3	d	DV_154_C2_042.bmp	d	1881
1	18	male	10	4	s	DV_298_C2_298.bmp	d	1252
1	18	male	10	5	s	C2_278_DV_278.bmp	d	1761
1	18	male	10	6	d	DV_132_C2_168.bmp	d	1601
1	18	male	10	7	d	DV_217_C2_185.bmp	d	1159
1	18	male	10	8	s	C2_302_DV_302.bmp	s	1080
1	18	male	10	9	d	DV_244_C2_042.bmp	d	1115
1	18	male	10	10	s	DV_259_C2_259.bmp	d	1453
1	18	male	10	11	s	C2_258_DV_258.bmp	s	1450
1	18	male	10	12	s	C2_257_DV_257.bmp	s	1391
1	18	male	10	13	d	DV_237_C2_297.bmp	d	1134
1	18	male	10	14	d	DV_296_C2_235.bmp	d	1160
1	18	male	10	15	d	C2_083_DV_108.bmp	d	1816
1	18	male	10	16	s	DV_284_C2_284.bmp	d	1495
1	18	male	10	17	d	DV_208_C2_183.bmp	d	1561
1	18	male	10	18	s	C2_260_DV_260.bmp	s	1593
1	18	male	10	19	s	DV_286_C2_286.bmp	d	2864
1	18	male	10	20	s	C2_290_DV_290.bmp	d	2820
1	18	male	10	21	d	DV_199_C2_125.bmp	d	1466
1	18	male	10	22	s	C2_294_DV_294.bmp	d	30
1	18	male	10	23	d	DV_238_C2_218.bmp	d	3307
1	18	male	10	24	d	DV_170_C2_270.bmp	d	1406
1	18	male	10	25	d	DV_219_C2_135.bmp	s	1053
1	18	male	10	26	s	DV_300_C2_300.bmp	d	1242
1	18	male	10	27	s	DV_299_C2_299.bmp	d	1279
1	18	male	10	28	d	DV_295_C2_216.bmp	d	1219
1	18	male	10	29	s	DV_265_C2_265.bmp	d	1225
1	18	male	10	30	s	C2_256_DV_256.bmp	d	1814
1	18	male	10	31	d	DV_203_C2_277.bmp	s	1660
1	18	male	10	32	s	C2_291_DV_291.bmp	d	1505
1	18	male	10	33	d	C2_008_DV_039.bmp	s	2251
1	18	male	10	34	d	DV_133_C2_139.bmp	d	1344
1	18	male	10	35	d	DV_277_C2_110.bmp	d	1505
1	18	male	10	36	s	DV_274_C2_274.bmp	d	1596
1	18	male	10	37	d	DV_254_C2_287.bmp	d	3194
1	18	male	10	38	s	C2_288_DV_288.bmp	d	2273
1	18	male	10	39	s	DV_267_C2_267.bmp	s	2325
1	18	male	10	40	d	DV_280_C2_003.bmp	d	5782
1	18	male	11	1	s	C2_031_DV_031.bmp	d	2992
1	18	male	11	2	d	C2_038_DV_081.bmp	d	1368
1	18	male	11	3	s	C2_036_DV_036.bmp	d	1296
1	18	male	11	4	s	C2_040_DV_040.bmp	s	3938
1	18	male	11	5	s	C2_043_DV_043.bmp	s	2723
1	18	male	11	6	d	C2_018_DV_019.bmp	d	1677
1	18	male	11	7	s	DV_015_C2_015.bmp	d	1377
1	18	male	11	8	d	C2_023_DV_304.bmp	d	2945
1	18	male	11	9	d	DV_303_C2_217.bmp	d	1202
1	18	male	11	10	s	DV_062_C2_062.bmp	d	1104
1	18	male	11	11	s	C2_034_DV_034.bmp	d	1691
1	18	male	11	12	s	C2_005_DV_005.bmp	d	1838
1	18	male	11	13	d	C2_024_DV_030.bmp	d	1116
1	18	male	11	14	s	C2_014_DV_014.bmp	d	1198
1	18	male	11	15	d	C2_004_DV_293.bmp	d	1348
1	18	male	11	16	s	C2_028_DV_028.bmp	d	1188
1	18	male	11	17	d	C2_037_DV_085.bmp	d	2060
1	18	male	11	18	s	C2_025_DV_025.bmp	d	1337
1	18	male	11	19	s	C2_007_DV_007.bmp	d	1642
1	18	male	11	20	s	C2_056_DV_056.bmp	s	903
1	18	male	11	21	d	C2_012_DV_205.bmp	d	2122
1	18	male	11	22	d	DV_129_C2_092.bmp	s	1180
1	18	male	11	23	s	C2_016_DV_016.bmp	d	2276
1	18	male	11	24	s	C2_054_DV_054.bmp	s	1544
1	18	male	11	25	d	C2_007_DV_097.bmp	d	2384
1	18	male	11	26	d	C2_011_DV_049.bmp	d	1560
1	18	male	11	27	s	C2_035_DV_035.bmp	d	3016
1	18	male	11	28	d	C2_039_DV_072.bmp	d	1887
1	18	male	11	29	s	C2_017_DV_017.bmp	d	2146
1	18	male	11	30	s	DV_046_C2_046.bmp	d	3723
1	18	male	11	31	d	C2_010_DV_303.bmp	d	1685
1	18	male	11	32	d	C2_009_DV_033.bmp	d	2248
1	18	male	11	33	d	C2_051_DV_238.bmp	d	2781
1	18	male	11	34	d	C2_041_DV_044.bmp	d	3908
1	18	male	11	35	d	C2_261_DV_201.bmp	d	2918
1	18	male	11	36	d	C2_021_DV_087.bmp	d	2960
1	18	male	11	37	d	C2_033_DV_180.bmp	d	3913
1	18	male	11	38	s	DV_029_C2_029.bmp	d	1659
1	18	male	11	39	d	C2_050_DV_215.bmp	d	2088
1	18	male	11	40	s	C2_061_DV_061.bmp	s	3019
1	18	male	12	1	s	C2_069_DV_069.bmp	s	2840
1	18	male	12	2	d	C2_092_DV_227.bmp	d	1710
1	18	male	12	3	s	DV_100_C2_100.bmp	s	3128
1	18	male	12	4	d	C2_211_DV_128.bmp	d	1618
1	18	male	12	5	d	C2_098_DV_024.bmp	d	3640
1	18	male	12	6	d	C2_108_DV_282.bmp	d	2381
1	18	male	12	7	s	C2_101_DV_101.bmp	s	1901
1	18	male	12	8	s	C2_066_DV_066.bmp	d	4584
1	18	male	12	9	s	C2_068_DV_068.bmp	s	1359
1	18	male	12	10	d	C2_182_DV_184.bmp	d	1255
1	18	male	12	11	d	C2_070_DV_012.bmp	d	1620
1	18	male	12	12	d	C2_206_DV_077.bmp	d	2634
1	18	male	12	13	s	C2_080_DV_080.bmp	d	2519
1	18	male	12	14	d	C2_055_DV_059.bmp	s	1233
1	18	male	12	15	d	C2_057_DV_067.bmp	s	1263
1	18	male	12	16	s	C2_082_DV_082.bmp	s	1075
1	18	male	12	17	s	DV_086_C2_086.bmp	s	1783
1	18	male	12	18	d	C2_117_DV_219.bmp	d	2446
1	18	male	12	19	s	C2_073_DV_073.bmp	d	2467
1	18	male	12	20	s	C2_071_DV_071.bmp	d	1742
1	18	male	12	21	s	C2_102_DV_102.bmp	s	1135
1	18	male	12	22	s	C2_078_DV_078.bmp	s	1249
1	18	male	12	23	s	DV_089_C2_089.bmp	d	3118
1	18	male	12	24	d	C2_095_DV_229.bmp	d	1368
1	18	male	12	25	d	C2_218_DV_109.bmp	d	1280
1	18	male	12	26	d	C2_171_DV_185.bmp	s	3075
1	18	male	12	27	s	DV_103_C2_103.bmp	d	3543
1	18	male	12	28	d	C2_143_DV_254.bmp	s	3801
1	18	male	12	29	d	C2_002_DV_041.bmp	d	3135
1	18	male	12	30	s	C2_084_DV_084.bmp	d	1952
1	18	male	12	31	d	C2_139_DV_120.bmp	d	3137
1	18	male	12	32	d	C2_076_DV_051.bmp	d	3762
1	18	male	12	33	s	C2_063_DV_063.bmp	s	2139
1	18	male	12	34	s	C2_079_DV_079.bmp	s	12987
1	18	male	12	35	s	DV_104_C2_104.bmp	d	4595
1	18	male	12	36	d	C2_123_DV_223.bmp	d	1914
1	18	male	12	37	d	C2_174_DV_183.bmp	d	1868
1	18	male	12	38	s	C2_065_DV_065.bmp	s	3888
1	18	male	12	39	s	DV_064_C2_064.bmp	d	3035
1	18	male	12	40	d	C2_091_DV_283.bmp	d	2169
1	18	male	13	1	d	DV_024_C2_085.bmp	s	2128
1	18	male	13	2	s	C2_119_DV_119.bmp	s	3569
1	18	male	13	3	d	C2_261_DV_287.bmp	s	2921
1	18	male	13	4	s	C2_146_DV_146.bmp	s	1812
1	18	male	13	5	d	C2_003_DV_018.bmp	d	1834
1	18	male	13	6	s	DV_141_C2_141.bmp	s	3431
1	18	male	13	7	s	C2_131_DV_131.bmp	d	1349
1	18	male	13	8	s	DV_111_C2_111.bmp	d	1549
1	18	male	13	9	s	DV_127_C2_127.bmp	d	3518
1	18	male	13	10	s	C2_152_DV_152.bmp	d	2655
1	18	male	13	11	s	C2_105_DV_105.bmp	d	4356
1	18	male	13	12	d	DV_009_C2_180.bmp	d	1509
1	18	male	13	13	d	C2_240_DV_044.bmp	d	5584
1	18	male	13	14	d	DV_020_C2_090.bmp	s	1319
1	18	male	13	15	d	C2_289_DV_039.bmp	s	2145
1	18	male	13	16	d	C2_242_DV_246.bmp	d	2226
1	18	male	13	17	s	DV_147_C2_147.bmp	d	1928
1	18	male	13	18	s	C2_140_DV_140.bmp	d	2536
1	18	male	13	19	d	C2_304_DV_099.bmp	s	4306
1	18	male	13	20	d	C2_246_DV_160.bmp	d	2909
1	18	male	13	21	d	DV_032_C2_153.bmp	d	2240
1	18	male	13	22	d	C2_232_DV_048.bmp	d	1365
1	18	male	13	23	d	C2_249_DV_083.bmp	d	1437
1	18	male	13	24	s	C2_113_DV_113.bmp	s	3522
1	18	male	13	25	s	C2_115_DV_115.bmp	s	5036
1	18	male	13	26	d	DV_012_C2_205.bmp	d	2897
1	18	male	13	27	s	C2_134_DV_134.bmp	s	1972
1	18	male	13	28	s	C2_124_DV_124.bmp	d	4932
1	18	male	13	29	s	C2_112_DV_112.bmp	d	1558
1	18	male	13	30	s	DV_137_C2_137.bmp	d	1950
1	18	male	13	31	d	DV_013_C2_235.bmp	s	2023
1	18	male	13	32	d	C2_252_DV_125.bmp	s	1477
1	18	male	13	33	s	DV_118_C2_118.bmp	d	2113
1	18	male	13	34	d	DV_037_C2_303.bmp	s	1258
1	18	male	13	35	d	C2_266_DV_227.bmp	s	1862
1	18	male	13	36	s	C2_144_DV_144.bmp	d	1987
1	18	male	13	37	d	C2_223_DV_242.bmp	s	2770
1	18	male	13	38	d	C2_239_DV_114.bmp	s	2338
1	18	male	13	39	s	C2_116_DV_116.bmp	s	6836
1	18	male	13	40	s	C2_142_DV_142.bmp	s	1913
1	18	male	14	1	d	DV_081_C2_282.bmp	d	3003
1	18	male	14	2	s	C2_247_DV_247.bmp	s	3937
1	18	male	14	3	s	C2_158_DV_158.bmp	d	1395
1	18	male	14	4	s	DV_167_C2_167.bmp	s	1233
1	18	male	14	5	d	DV_132_C2_210.bmp	d	1191
1	18	male	14	6	s	DV_190_C2_190.bmp	d	1726
1	18	male	14	7	s	C2_243_DV_243.bmp	d	1312
1	18	male	14	8	d	DV_160_C2_154.bmp	d	1754
1	18	male	14	9	s	DV_222_C2_222.bmp	s	10026
1	18	male	14	10	d	DV_039_C2_296.bmp	d	1576
1	18	male	14	11	d	DV_129_C2_199.bmp	d	1360
1	18	male	14	12	d	DV_091_C2_211.bmp	d	1520
1	18	male	14	13	s	DV_166_C2_166.bmp	s	1507
1	18	male	14	14	d	DV_130_C2_253.bmp	s	3005
1	18	male	14	15	d	DV_126_C2_076.bmp	d	1492
1	18	male	14	16	d	DV_120_C2_133.bmp	s	1600
1	18	male	14	17	d	DV_178_C2_060.bmp	s	4054
1	18	male	14	18	s	C2_226_DV_226.bmp	s	6730
1	18	male	14	19	s	DV_200_C2_200.bmp	d	1516
1	18	male	14	20	s	C2_157_DV_157.bmp	d	2942
1	18	male	14	21	d	DV_094_C2_022.bmp	s	2007
1	18	male	14	22	d	DV_108_C2_038.bmp	d	1406
1	18	male	14	23	s	C2_172_DV_172.bmp	s	2173
1	18	male	14	24	d	DV_114_C2_126.bmp	s	4469
1	18	male	14	25	s	DV_161_C2_161.bmp	s	2817
1	18	male	14	26	d	DV_053_C2_208.bmp	s	1326
1	18	male	14	27	s	DV_231_C2_231.bmp	s	2224
1	18	male	14	28	d	DV_074_C2_075.bmp	d	1470
1	18	male	14	29	d	DV_045_C2_027.bmp	d	2186
1	18	male	14	30	d	DV_088_C2_295.bmp	d	1266
1	18	male	14	31	s	DV_214_C2_214.bmp	d	1326
1	18	male	14	32	s	C2_155_DV_155.bmp	s	2432
1	18	male	14	33	d	DV_052_C2_264.bmp	s	1477
1	18	male	14	34	s	C2_194_DV_194.bmp	s	1713
1	18	male	14	35	d	DV_109_C2_268.bmp	s	1555
1	18	male	14	36	d	DV_048_C2_175.bmp	s	1971
1	18	male	14	37	s	DV_248_C2_248.bmp	s	2523
1	18	male	14	38	s	C2_207_DV_207.bmp	s	3701
1	18	male	14	39	s	DV_204_C2_204.bmp	s	3592
1	18	male	14	40	s	C2_181_Dv_181.bmp	d	2255
1	18	male	15	1	s	C2_291_DV_291.bmp	s	3628
1	18	male	15	2	s	DV_265_C2_265.bmp	d	1881
1	18	male	15	3	s	DV_299_C2_299.bmp	s	3781
1	18	male	15	4	d	C2_083_DV_108.bmp	d	2787
1	18	male	15	5	d	C2_008_DV_039.bmp	d	10051
1	18	male	15	6	s	DV_274_C2_274.bmp	s	4192
1	18	male	15	7	s	DV_284_C2_284.bmp	s	3023
1	18	male	15	8	d	DV_244_C2_042.bmp	d	3229
1	18	male	15	9	s	DV_259_C2_259.bmp	d	2546
1	18	male	15	10	s	C2_256_DV_256.bmp	d	3283
1	18	male	15	11	d	DV_199_C2_125.bmp	d	6366
1	18	male	15	12	d	DV_178_C2_099.bmp	d	1318
1	18	male	15	13	s	C2_290_DV_290.bmp	s	1665
1	18	male	15	14	d	DV_238_C2_218.bmp	s	1565
1	18	male	15	15	s	DV_298_C2_298.bmp	s	1197
1	18	male	15	16	s	C2_294_DV_294.bmp	d	2787
1	18	male	15	17	d	DV_133_C2_139.bmp	d	1858
1	18	male	15	18	d	DV_154_C2_042.bmp	s	2023
1	18	male	15	19	d	DV_237_C2_297.bmp	d	1165
1	18	male	15	20	s	DV_300_C2_300.bmp	s	1693
1	18	male	15	21	s	C2_257_DV_257.bmp	s	1712
1	18	male	15	22	d	DV_203_C2_277.bmp	s	1682
1	18	male	15	23	d	DV_277_C2_110.bmp	s	1382
1	18	male	15	24	s	C2_260_DV_260.bmp	s	1189
1	18	male	15	25	d	DV_296_C2_235.bmp	s	2765
1	18	male	15	26	d	DV_280_C2_003.bmp	s	1405
1	18	male	15	27	d	DV_170_C2_270.bmp	s	1763
1	18	male	15	28	d	DV_132_C2_168.bmp	s	1227
1	18	male	15	29	d	DV_217_C2_185.bmp	d	2049
1	18	male	15	30	s	C2_302_DV_302.bmp	s	2837
1	18	male	15	31	s	C2_271_DV_271.bmp	s	2235
1	18	male	15	32	d	DV_254_C2_287.bmp	d	1712
1	18	male	15	33	s	C2_288_DV_288.bmp	d	2130
1	18	male	15	34	s	DV_286_C2_286.bmp	d	1908
1	18	male	15	35	d	DV_219_C2_135.bmp	s	1719
1	18	male	15	36	s	C2_278_DV_278.bmp	d	1841
1	18	male	15	37	s	C2_258_DV_258.bmp	d	1262
1	18	male	15	38	s	DV_267_C2_267.bmp	d	1433
1	18	male	15	39	d	DV_208_C2_183.bmp	d	1511
1	18	male	15	40	d	DV_295_C2_216.bmp	d	1761
1	18	male	16	1	d	C2_024_DV_030.bmp	s	3211
1	18	male	16	2	d	C2_041_DV_044.bmp	s	2025
1	18	male	16	3	d	C2_050_DV_215.bmp	d	1287
1	18	male	16	4	s	C2_031_DV_031.bmp	d	1042
1	18	male	16	5	d	C2_039_DV_072.bmp	s	1615
1	18	male	16	6	s	C2_007_DV_007.bmp	d	1173
1	18	male	16	7	d	DV_129_C2_092.bmp	d	1773
1	18	male	16	8	s	DV_046_C2_046.bmp	d	1117
1	18	male	16	9	d	C2_009_DV_033.bmp	d	1832
1	18	male	16	10	s	C2_005_DV_005.bmp	s	2085
1	18	male	16	11	d	C2_051_DV_238.bmp	d	2824
1	18	male	16	12	s	DV_062_C2_062.bmp	s	1295
1	18	male	16	13	d	C2_021_DV_087.bmp	d	1529
1	18	male	16	14	s	C2_054_DV_054.bmp	d	1579
1	18	male	16	15	d	C2_007_DV_097.bmp	s	1513
1	18	male	16	16	d	C2_038_DV_081.bmp	d	1043
1	18	male	16	17	s	C2_025_DV_025.bmp	s	2217
1	18	male	16	18	d	C2_012_DV_205.bmp	d	2431
1	18	male	16	19	s	C2_034_DV_034.bmp	d	1060
1	18	male	16	20	s	C2_040_DV_040.bmp	d	1345
1	18	male	16	21	d	C2_023_DV_304.bmp	d	1586
1	18	male	16	22	s	C2_017_DV_017.bmp	d	1217
1	18	male	16	23	d	DV_303_C2_217.bmp	d	1711
1	18	male	16	24	s	DV_029_C2_029.bmp	d	1497
1	18	male	16	25	d	C2_033_DV_180.bmp	d	1332
1	18	male	16	26	d	C2_011_DV_049.bmp	d	1125
1	18	male	16	27	s	C2_028_DV_028.bmp	d	1166
1	18	male	16	28	s	C2_043_DV_043.bmp	d	2254
1	18	male	16	29	s	C2_035_DV_035.bmp	d	2475
1	18	male	16	30	d	C2_261_DV_201.bmp	d	1279
1	18	male	16	31	d	C2_018_DV_019.bmp	d	1483
1	18	male	16	32	d	C2_010_DV_303.bmp	d	1966
1	18	male	16	33	s	DV_015_C2_015.bmp	d	1750
1	18	male	16	34	s	C2_014_DV_014.bmp	d	2359
1	18	male	16	35	d	C2_004_DV_293.bmp	d	1392
1	18	male	16	36	s	C2_061_DV_061.bmp	s	1423
1	18	male	16	37	s	C2_016_DV_016.bmp	s	1509
1	18	male	16	38	s	C2_036_DV_036.bmp	d	1295
1	18	male	16	39	d	C2_037_DV_085.bmp	d	1146
1	18	male	16	40	s	C2_056_DV_056.bmp	s	1291
1	18	male	17	1	d	C2_206_DV_077.bmp	d	1750
1	18	male	17	2	d	C2_108_DV_282.bmp	d	1783
1	18	male	17	3	d	C2_123_DV_223.bmp	d	1294
1	18	male	17	4	s	C2_101_DV_101.bmp	s	1281
1	18	male	17	5	s	DV_103_C2_103.bmp	s	1916
1	18	male	17	6	s	C2_069_DV_069.bmp	s	2406
1	18	male	17	7	s	C2_066_DV_066.bmp	d	1741
1	18	male	17	8	d	C2_182_DV_184.bmp	d	1311
1	18	male	17	9	d	C2_117_DV_219.bmp	d	2688
1	18	male	17	10	s	C2_080_DV_080.bmp	d	1212
1	18	male	17	11	s	DV_086_C2_086.bmp	d	1410
1	18	male	17	12	s	C2_078_DV_078.bmp	s	1401
1	18	male	17	13	d	C2_002_DV_041.bmp	s	2087
1	18	male	17	14	s	C2_065_DV_065.bmp	d	2499
1	18	male	17	15	s	DV_064_C2_064.bmp	d	1206
1	18	male	17	16	d	C2_057_DV_067.bmp	s	892
1	18	male	17	17	s	DV_104_C2_104.bmp	d	1416
1	18	male	17	18	s	C2_082_DV_082.bmp	s	2022
1	18	male	17	19	s	C2_068_DV_068.bmp	s	1052
1	18	male	17	20	d	C2_218_DV_109.bmp	s	1720
1	18	male	17	21	s	C2_063_DV_063.bmp	s	1258
1	18	male	17	22	d	C2_098_DV_024.bmp	d	1230
1	18	male	17	23	d	C2_143_DV_254.bmp	s	1444
1	18	male	17	24	d	C2_076_DV_051.bmp	s	2289
1	18	male	17	25	d	C2_070_DV_012.bmp	d	1292
1	18	male	17	26	s	C2_073_DV_073.bmp	d	1063
1	18	male	17	27	s	C2_071_DV_071.bmp	d	1051
1	18	male	17	28	d	C2_174_DV_183.bmp	d	1712
1	18	male	17	29	d	C2_171_DV_185.bmp	s	1242
1	18	male	17	30	d	C2_139_DV_120.bmp	d	1264
1	18	male	17	31	s	C2_084_DV_084.bmp	d	1244
1	18	male	17	32	d	C2_055_DV_059.bmp	d	2136
1	18	male	17	33	s	DV_089_C2_089.bmp	d	2602
1	18	male	17	34	d	C2_095_DV_229.bmp	s	1320
1	18	male	17	35	d	C2_211_DV_128.bmp	d	1514
1	18	male	17	36	s	C2_102_DV_102.bmp	d	901
1	18	male	17	37	d	C2_091_DV_283.bmp	s	1879
1	18	male	17	38	d	C2_092_DV_227.bmp	s	2171
1	18	male	17	39	s	DV_100_C2_100.bmp	s	1635
1	18	male	17	40	s	C2_079_DV_079.bmp	d	7280
1	18	male	18	1	d	C2_003_DV_018.bmp	d	1915
1	18	male	18	2	s	C2_144_DV_144.bmp	d	2493
1	18	male	18	3	s	DV_147_C2_147.bmp	d	1672
1	18	male	18	4	d	DV_009_C2_180.bmp	d	1284
1	18	male	18	5	s	C2_124_DV_124.bmp	d	2224
1	18	male	18	6	d	DV_032_C2_153.bmp	d	1006
1	18	male	18	7	d	C2_240_DV_044.bmp	d	1245
1	18	male	18	8	s	C2_142_DV_142.bmp	d	2097
1	18	male	18	9	d	C2_289_DV_039.bmp	d	1196
1	18	male	18	10	s	C2_112_DV_112.bmp	d	2371
1	18	male	18	11	d	DV_037_C2_303.bmp	s	1402
1	18	male	18	12	d	C2_246_DV_160.bmp	s	1217
1	18	male	18	13	s	C2_146_DV_146.bmp	d	1311
1	18	male	18	14	s	C2_116_DV_116.bmp	s	1329
1	18	male	18	15	d	C2_266_DV_227.bmp	s	1306
1	18	male	18	16	s	C2_140_DV_140.bmp	d	1141
1	18	male	18	17	d	C2_252_DV_125.bmp	d	1215
1	18	male	18	18	d	C2_232_DV_048.bmp	d	1205
1	18	male	18	19	s	DV_141_C2_141.bmp	d	1643
1	18	male	18	20	d	C2_261_DV_287.bmp	d	2273
1	18	male	18	21	d	C2_304_DV_099.bmp	d	1221
1	18	male	18	22	s	C2_113_DV_113.bmp	d	1619
1	18	male	18	23	s	DV_127_C2_127.bmp	s	920
1	18	male	18	24	d	C2_249_DV_083.bmp	d	1226
1	18	male	18	25	d	C2_223_DV_242.bmp	s	920
1	18	male	18	26	s	DV_137_C2_137.bmp	d	994
1	18	male	18	27	s	C2_131_DV_131.bmp	s	953
1	18	male	18	28	s	C2_152_DV_152.bmp	d	1234
1	18	male	18	29	s	C2_119_DV_119.bmp	d	1095
1	18	male	18	30	d	DV_013_C2_235.bmp	d	1170
1	18	male	18	31	d	DV_024_C2_085.bmp	d	2354
1	18	male	18	32	d	C2_242_DV_246.bmp	d	2195
1	18	male	18	33	d	DV_012_C2_205.bmp	d	1817
1	18	male	18	34	d	DV_020_C2_090.bmp	s	1560
1	18	male	18	35	s	DV_111_C2_111.bmp	d	1543
1	18	male	18	36	s	DV_118_C2_118.bmp	d	1464
1	18	male	18	37	s	C2_105_DV_105.bmp	d	1508
1	18	male	18	38	s	C2_115_DV_115.bmp	d	1463
1	18	male	18	39	d	C2_239_DV_114.bmp	d	4379
1	18	male	18	40	s	C2_134_DV_134.bmp	s	3914
1	18	male	19	1	s	DV_200_C2_200.bmp	s	1269
1	18	male	19	2	s	DV_248_C2_248.bmp	s	1401
1	18	male	19	3	s	C2_155_DV_155.bmp	s	3199
1	18	male	19	4	s	DV_214_C2_214.bmp	d	1805
1	18	male	19	5	s	DV_222_C2_222.bmp	d	1748
1	18	male	19	6	d	DV_052_C2_264.bmp	d	1893
1	18	male	19	7	s	C2_157_DV_157.bmp	d	1864
1	18	male	19	8	d	DV_126_C2_076.bmp	s	2212
1	18	male	19	9	d	DV_091_C2_211.bmp	s	2274
1	18	male	19	10	d	DV_109_C2_268.bmp	d	2222
1	18	male	19	11	d	DV_178_C2_060.bmp	d	1213
1	18	male	19	12	s	DV_167_C2_167.bmp	d	1699
1	18	male	19	13	d	DV_045_C2_027.bmp	d	1237
1	18	male	19	14	s	DV_166_C2_166.bmp	s	1299
1	18	male	19	15	d	DV_039_C2_296.bmp	s	1317
1	18	male	19	16	s	C2_172_DV_172.bmp	d	1159
1	18	male	19	17	s	C2_194_DV_194.bmp	d	1783
1	18	male	19	18	s	DV_231_C2_231.bmp	d	1191
1	18	male	19	19	d	DV_081_C2_282.bmp	d	1038
1	18	male	19	20	s	C2_181_Dv_181.bmp	d	1524
1	18	male	19	21	s	C2_226_DV_226.bmp	s	1430
1	18	male	19	22	s	C2_247_DV_247.bmp	s	1187
1	18	male	19	23	d	DV_114_C2_126.bmp	d	1410
1	18	male	19	24	d	DV_160_C2_154.bmp	d	1833
1	18	male	19	25	d	DV_130_C2_253.bmp	d	1319
1	18	male	19	26	s	DV_161_C2_161.bmp	d	1185
1	18	male	19	27	s	C2_243_DV_243.bmp	d	1295
1	18	male	19	28	d	DV_048_C2_175.bmp	d	1618
1	18	male	19	29	s	C2_207_DV_207.bmp	d	1592
1	18	male	19	30	s	C2_158_DV_158.bmp	d	1575
1	18	male	19	31	d	DV_108_C2_038.bmp	s	1759
1	18	male	19	32	s	DV_190_C2_190.bmp	d	2240
1	18	male	19	33	d	DV_120_C2_133.bmp	d	1350
1	18	male	19	34	d	DV_132_C2_210.bmp	d	1654
1	18	male	19	35	d	DV_094_C2_022.bmp	d	2507
1	18	male	19	36	d	DV_129_C2_199.bmp	d	1486
1	18	male	19	37	d	DV_088_C2_295.bmp	d	1137
1	18	male	19	38	s	DV_204_C2_204.bmp	d	1090
1	18	male	19	39	d	DV_053_C2_208.bmp	d	997
1	18	male	19	40	d	DV_074_C2_075.bmp	d	1100
1	18	male	20	1	s	C2_288_DV_288.bmp	d	1871
1	18	male	20	2	s	DV_286_C2_286.bmp	d	1475
1	18	male	20	3	s	C2_294_DV_294.bmp	s	5687
1	18	male	20	4	s	C2_258_DV_258.bmp	s	1370
1	18	male	20	5	d	DV_254_C2_287.bmp	s	1130
1	18	male	20	6	d	DV_203_C2_277.bmp	s	1900
1	18	male	20	7	d	DV_208_C2_183.bmp	s	1911
1	18	male	20	8	s	C2_257_DV_257.bmp	s	1304
1	18	male	20	9	s	DV_265_C2_265.bmp	d	1371
1	18	male	20	10	d	DV_154_C2_042.bmp	d	1227
1	18	male	20	11	d	C2_008_DV_039.bmp	d	4785
1	18	male	20	12	d	DV_217_C2_185.bmp	d	1456
1	18	male	20	13	d	DV_238_C2_218.bmp	s	1741
1	18	male	20	14	s	C2_271_DV_271.bmp	d	1854
1	18	male	20	15	d	DV_295_C2_216.bmp	d	1867
1	18	male	20	16	d	DV_132_C2_168.bmp	d	1599
1	18	male	20	17	s	C2_291_DV_291.bmp	d	1790
1	18	male	20	18	s	DV_274_C2_274.bmp	d	2620
1	18	male	20	19	d	DV_244_C2_042.bmp	d	2858
1	18	male	20	20	s	DV_259_C2_259.bmp	s	1071
1	18	male	20	21	s	C2_278_DV_278.bmp	d	1203
1	18	male	20	22	d	DV_237_C2_297.bmp	d	1298
1	18	male	20	23	s	DV_298_C2_298.bmp	d	1525
1	18	male	20	24	s	C2_260_DV_260.bmp	s	967
1	18	male	20	25	s	DV_299_C2_299.bmp	d	1207
1	18	male	20	26	s	DV_300_C2_300.bmp	s	982
1	18	male	20	27	s	C2_256_DV_256.bmp	s	1229
1	18	male	20	28	d	DV_296_C2_235.bmp	s	1770
1	18	male	20	29	d	DV_280_C2_003.bmp	d	2145
1	18	male	20	30	s	C2_290_DV_290.bmp	d	1378
1	18	male	20	31	d	DV_170_C2_270.bmp	d	1426
1	18	male	20	32	s	C2_302_DV_302.bmp	s	1464
1	18	male	20	33	s	DV_284_C2_284.bmp	s	1708
1	18	male	20	34	d	DV_133_C2_139.bmp	s	2135
1	18	male	20	35	d	C2_083_DV_108.bmp	d	1392
1	18	male	20	36	d	DV_277_C2_110.bmp	d	1343
1	18	male	20	37	d	DV_178_C2_099.bmp	d	1217
1	18	male	20	38	d	DV_219_C2_135.bmp	d	1167
1	18	male	20	39	s	DV_267_C2_267.bmp	s	1503
1	18	male	20	40	d	DV_199_C2_125.bmp	s	1394
1	18	male	21	1	d	C2_033_DV_180.bmp	d	1254
1	18	male	21	2	d	C2_024_DV_030.bmp	s	1291
1	18	male	21	3	s	C2_025_DV_025.bmp	d	1486
1	18	male	21	4	d	DV_129_C2_092.bmp	s	1218
1	18	male	21	5	s	DV_062_C2_062.bmp	s	999
1	18	male	21	6	s	C2_054_DV_054.bmp	s	1038
1	18	male	21	7	s	C2_014_DV_014.bmp	d	1331
1	18	male	21	8	s	C2_035_DV_035.bmp	s	1540
1	18	male	21	9	s	C2_061_DV_061.bmp	d	990
1	18	male	21	10	d	C2_011_DV_049.bmp	s	1933
1	18	male	21	11	d	DV_303_C2_217.bmp	d	1111
1	18	male	21	12	d	C2_021_DV_087.bmp	d	1465
1	18	male	21	13	d	C2_007_DV_097.bmp	s	1709
1	18	male	21	14	d	C2_018_DV_019.bmp	s	2664
1	18	male	21	15	s	C2_007_DV_007.bmp	d	1052
1	18	male	21	16	s	C2_017_DV_017.bmp	d	1448
1	18	male	21	17	d	C2_261_DV_201.bmp	d	1292
1	18	male	21	18	s	C2_043_DV_043.bmp	s	1008
1	18	male	21	19	d	C2_050_DV_215.bmp	d	1350
1	18	male	21	20	s	C2_040_DV_040.bmp	d	1319
1	18	male	21	21	s	C2_031_DV_031.bmp	s	3105
1	18	male	21	22	d	C2_038_DV_081.bmp	d	1428
1	18	male	21	23	d	C2_037_DV_085.bmp	d	1625
1	18	male	21	24	d	C2_004_DV_293.bmp	d	1487
1	18	male	21	25	d	C2_012_DV_205.bmp	d	1955
1	18	male	21	26	d	C2_023_DV_304.bmp	d	1356
1	18	male	21	27	d	C2_010_DV_303.bmp	d	1524
1	18	male	21	28	s	DV_046_C2_046.bmp	d	2429
1	18	male	21	29	s	C2_034_DV_034.bmp	s	1043
1	18	male	21	30	s	C2_028_DV_028.bmp	s	1736
1	18	male	21	31	s	C2_016_DV_016.bmp	s	1226
1	18	male	21	32	s	C2_056_DV_056.bmp	s	896
1	18	male	21	33	d	C2_009_DV_033.bmp	d	1778
1	18	male	21	34	d	C2_041_DV_044.bmp	s	1594
1	18	male	21	35	s	C2_005_DV_005.bmp	s	1201
1	18	male	21	36	s	DV_015_C2_015.bmp	s	1160
1	18	male	21	37	d	C2_039_DV_072.bmp	d	1233
1	18	male	21	38	s	DV_029_C2_029.bmp	d	2158
1	18	male	21	39	s	C2_036_DV_036.bmp	s	1974
1	18	male	21	40	d	C2_051_DV_238.bmp	d	1086
1	18	male	22	1	s	C2_069_DV_069.bmp	d	1089
1	18	male	22	2	d	C2_095_DV_229.bmp	d	1549
1	18	male	22	3	d	C2_091_DV_283.bmp	s	2094
1	18	male	22	4	d	C2_098_DV_024.bmp	s	1528
1	18	male	22	5	s	C2_066_DV_066.bmp	d	1746
1	18	male	22	6	s	C2_101_DV_101.bmp	s	1339
1	18	male	22	7	d	C2_139_DV_120.bmp	d	1132
1	18	male	22	8	d	C2_123_DV_223.bmp	d	1285
1	18	male	22	9	d	C2_108_DV_282.bmp	d	1705
1	18	male	22	10	s	C2_079_DV_079.bmp	d	1155
1	18	male	22	11	d	C2_218_DV_109.bmp	d	2347
1	18	male	22	12	s	DV_100_C2_100.bmp	s	2116
1	18	male	22	13	s	DV_104_C2_104.bmp	s	1614
1	18	male	22	14	s	DV_064_C2_064.bmp	s	1756
1	18	male	22	15	d	C2_117_DV_219.bmp	d	1365
1	18	male	22	16	d	C2_076_DV_051.bmp	d	1957
1	18	male	22	17	s	DV_103_C2_103.bmp	d	1630
1	18	male	22	18	s	C2_063_DV_063.bmp	s	1283
1	18	male	22	19	s	C2_082_DV_082.bmp	s	1287
1	18	male	22	20	d	C2_002_DV_041.bmp	s	1786
1	18	male	22	21	s	DV_086_C2_086.bmp	s	1945
1	18	male	22	22	s	C2_078_DV_078.bmp	s	1937
1	18	male	22	23	s	C2_073_DV_073.bmp	d	3691
1	18	male	22	24	d	C2_171_DV_185.bmp	d	918
1	18	male	22	25	d	C2_211_DV_128.bmp	d	1784
1	18	male	22	26	s	C2_068_DV_068.bmp	s	952
1	18	male	22	27	s	DV_089_C2_089.bmp	d	1336
1	18	male	22	28	d	C2_057_DV_067.bmp	d	1306
1	18	male	22	29	s	C2_071_DV_071.bmp	d	1420
1	18	male	22	30	d	C2_182_DV_184.bmp	d	5059
1	18	male	22	31	d	C2_092_DV_227.bmp	d	1423
1	18	male	22	32	d	C2_206_DV_077.bmp	d	1716
1	18	male	22	33	s	C2_084_DV_084.bmp	d	1287
1	18	male	22	34	d	C2_070_DV_012.bmp	d	1458
1	18	male	22	35	d	C2_143_DV_254.bmp	s	1415
1	18	male	22	36	s	C2_102_DV_102.bmp	s	2037
1	18	male	22	37	s	C2_080_DV_080.bmp	d	1538
1	18	male	22	38	s	C2_065_DV_065.bmp	d	1212
1	18	male	22	39	d	C2_174_DV_183.bmp	d	2514
1	18	male	22	40	d	C2_055_DV_059.bmp	d	2756
1	18	male	23	1	d	C2_261_DV_287.bmp	d	5788
1	18	male	23	2	s	DV_127_C2_127.bmp	d	2867
1	18	male	23	3	d	C2_240_DV_044.bmp	s	1607
1	18	male	23	4	s	C2_142_DV_142.bmp	s	894
1	18	male	23	5	d	C2_252_DV_125.bmp	s	1257
1	18	male	23	6	d	DV_009_C2_180.bmp	d	1318
1	18	male	23	7	s	C2_146_DV_146.bmp	s	1336
1	18	male	23	8	d	DV_013_C2_235.bmp	s	1353
1	18	male	23	9	s	DV_137_C2_137.bmp	s	1402
1	18	male	23	10	d	DV_032_C2_153.bmp	s	1248
1	18	male	23	11	d	C2_246_DV_160.bmp	s	2485
1	18	male	23	12	s	C2_113_DV_113.bmp	s	1384
1	18	male	23	13	s	C2_115_DV_115.bmp	s	2991
1	18	male	23	14	d	DV_012_C2_205.bmp	d	1383
1	18	male	23	15	d	C2_223_DV_242.bmp	d	2302
1	18	male	23	16	s	C2_119_DV_119.bmp	d	2113
1	18	male	23	17	s	C2_105_DV_105.bmp	d	1923
1	18	male	23	18	s	C2_131_DV_131.bmp	s	2669
1	18	male	23	19	d	C2_249_DV_083.bmp	s	2057
1	18	male	23	20	s	C2_140_DV_140.bmp	s	1990
1	18	male	23	21	s	C2_116_DV_116.bmp	s	1636
1	18	male	23	22	d	DV_037_C2_303.bmp	s	1266
1	18	male	23	23	d	C2_304_DV_099.bmp	s	1382
1	18	male	23	24	s	DV_118_C2_118.bmp	d	2253
1	18	male	23	25	d	C2_232_DV_048.bmp	d	1098
1	18	male	23	26	s	C2_144_DV_144.bmp	d	2573
1	18	male	23	27	s	DV_111_C2_111.bmp	s	2285
1	18	male	23	28	s	C2_134_DV_134.bmp	s	1112
1	18	male	23	29	d	DV_024_C2_085.bmp	s	1698
1	18	male	23	30	d	DV_020_C2_090.bmp	s	1197
1	18	male	23	31	d	C2_242_DV_246.bmp	d	1396
1	18	male	23	32	d	C2_266_DV_227.bmp	d	1746
1	18	male	23	33	s	C2_152_DV_152.bmp	s	1594
1	18	male	23	34	s	DV_141_C2_141.bmp	s	1537
1	18	male	23	35	d	C2_289_DV_039.bmp	d	2218
1	18	male	23	36	s	C2_124_DV_124.bmp	d	1425
1	18	male	23	37	d	C2_239_DV_114.bmp	s	1407
1	18	male	23	38	s	C2_112_DV_112.bmp	s	1269
1	18	male	23	39	s	DV_147_C2_147.bmp	s	1553
1	18	male	23	40	d	C2_003_DV_018.bmp	s	2266
1	18	male	24	1	s	DV_222_C2_222.bmp	s	1158
1	18	male	24	2	d	DV_088_C2_295.bmp	s	1239
1	18	male	24	3	s	DV_161_C2_161.bmp	s	1380
1	18	male	24	4	d	DV_129_C2_199.bmp	d	1355
1	18	male	24	5	s	DV_166_C2_166.bmp	s	1268
1	18	male	24	6	s	DV_231_C2_231.bmp	s	2904
1	18	male	24	7	s	C2_247_DV_247.bmp	s	1578
1	18	male	24	8	d	DV_109_C2_268.bmp	s	1874
1	18	male	24	9	s	C2_226_DV_226.bmp	d	1110
1	18	male	24	10	d	DV_120_C2_133.bmp	d	1593
1	18	male	24	11	s	C2_194_DV_194.bmp	s	1840
1	18	male	24	12	s	C2_172_DV_172.bmp	d	1814
1	18	male	24	13	d	DV_045_C2_027.bmp	d	1700
1	18	male	24	14	d	DV_132_C2_210.bmp	s	1766
1	18	male	24	15	s	C2_158_DV_158.bmp	d	2941
1	18	male	24	16	s	DV_190_C2_190.bmp	d	2111
1	18	male	24	17	d	DV_178_C2_060.bmp	d	1649
1	18	male	24	18	s	C2_207_DV_207.bmp	d	2382
1	18	male	24	19	s	C2_157_DV_157.bmp	d	1405
1	18	male	24	20	d	DV_048_C2_175.bmp	d	1260
1	18	male	24	21	d	DV_108_C2_038.bmp	d	1921
1	18	male	24	22	s	C2_181_Dv_181.bmp	d	1403
1	18	male	24	23	d	DV_126_C2_076.bmp	d	2698
1	18	male	24	24	s	DV_204_C2_204.bmp	s	1124
1	18	male	24	25	d	DV_074_C2_075.bmp	s	1141
1	18	male	24	26	s	DV_248_C2_248.bmp	d	1383
1	18	male	24	27	d	DV_039_C2_296.bmp	d	1070
1	18	male	24	28	d	DV_114_C2_126.bmp	d	1234
1	18	male	24	29	d	DV_053_C2_208.bmp	d	1504
1	18	male	24	30	d	DV_160_C2_154.bmp	d	1946
1	18	male	24	31	s	DV_200_C2_200.bmp	s	1259
1	18	male	24	32	d	DV_091_C2_211.bmp	s	1848
1	18	male	24	33	s	C2_243_DV_243.bmp	s	3965
1	18	male	24	34	d	DV_094_C2_022.bmp	s	1485
1	18	male	24	35	s	C2_155_DV_155.bmp	s	2495
1	18	male	24	36	d	DV_130_C2_253.bmp	s	1930
1	18	male	24	37	s	DV_167_C2_167.bmp	s	1595
1	18	male	24	38	s	DV_214_C2_214.bmp	s	1146
1	18	male	24	39	d	DV_081_C2_282.bmp	s	1579
1	18	male	24	40	d	DV_052_C2_264.bmp	s	1714
1	18	male	25	1	s	DV_299_C2_299.bmp	d	956
1	18	male	25	2	s	C2_271_DV_271.bmp	d	1197
1	18	male	25	3	d	DV_237_C2_297.bmp	d	1532
1	18	male	25	4	d	DV_170_C2_270.bmp	d	1309
1	18	male	25	5	d	C2_008_DV_039.bmp	s	3104
1	18	male	25	6	d	DV_217_C2_185.bmp	s	843
1	18	male	25	7	s	DV_286_C2_286.bmp	d	1327
1	18	male	25	8	s	C2_258_DV_258.bmp	d	1337
1	18	male	25	9	d	DV_296_C2_235.bmp	d	1986
1	18	male	25	10	d	DV_280_C2_003.bmp	d	1258
1	18	male	25	11	d	DV_244_C2_042.bmp	s	2054
1	18	male	25	12	s	C2_291_DV_291.bmp	d	1547
1	18	male	25	13	d	DV_254_C2_287.bmp	d	1668
1	18	male	25	14	s	C2_290_DV_290.bmp	d	1216
1	18	male	25	15	s	C2_288_DV_288.bmp	s	1774
1	18	male	25	16	s	C2_257_DV_257.bmp	s	1254
1	18	male	25	17	s	C2_260_DV_260.bmp	s	979
1	18	male	25	18	d	DV_178_C2_099.bmp	d	3137
1	18	male	25	19	d	DV_132_C2_168.bmp	d	1315
1	18	male	25	20	s	DV_298_C2_298.bmp	s	1197
1	18	male	25	21	s	DV_259_C2_259.bmp	s	1171
1	18	male	25	22	d	DV_203_C2_277.bmp	d	1564
1	18	male	25	23	s	DV_300_C2_300.bmp	s	1372
1	18	male	25	24	s	DV_265_C2_265.bmp	d	1236
1	18	male	25	25	d	DV_238_C2_218.bmp	s	1593
1	18	male	25	26	d	DV_208_C2_183.bmp	d	2640
1	18	male	25	27	s	C2_256_DV_256.bmp	s	1742
1	18	male	25	28	s	C2_302_DV_302.bmp	s	2007
1	18	male	25	29	d	DV_295_C2_216.bmp	d	1229
1	18	male	25	30	s	DV_284_C2_284.bmp	d	2331
1	18	male	25	31	s	C2_294_DV_294.bmp	s	1804
1	18	male	25	32	d	DV_199_C2_125.bmp	d	1787
1	18	male	25	33	d	DV_277_C2_110.bmp	d	1418
1	18	male	25	34	d	DV_133_C2_139.bmp	s	1576
1	18	male	25	35	d	DV_219_C2_135.bmp	d	2576
1	18	male	25	36	d	C2_083_DV_108.bmp	s	1616
1	18	male	25	37	s	DV_267_C2_267.bmp	s	3439
1	18	male	25	38	s	C2_278_DV_278.bmp	d	2971
1	18	male	25	39	s	DV_274_C2_274.bmp	d	1131
1	18	male	25	40	d	DV_154_C2_042.bmp	d	2893
2	19	female	1	1	d	DV_237_C2_297.bmp	d	47975
2	19	female	1	2	d	DV_132_C2_168.bmp	s	4845
2	19	female	1	3	s	DV_259_C2_259.bmp	s	3822
2	19	female	1	4	d	DV_244_C2_042.bmp	d	2248
2	19	female	1	5	s	DV_300_C2_300.bmp	s	2594
2	19	female	1	6	s	DV_267_C2_267.bmp	d	2167
2	19	female	1	7	d	C2_008_DV_039.bmp	d	11385
2	19	female	1	8	s	C2_260_DV_260.bmp	s	2624
2	19	female	1	9	d	DV_254_C2_287.bmp	d	2899
2	19	female	1	10	s	DV_286_C2_286.bmp	s	2059
2	19	female	1	11	s	C2_290_DV_290.bmp	s	5946
2	19	female	1	12	s	C2_288_DV_288.bmp	s	1368
2	19	female	1	13	s	DV_274_C2_274.bmp	d	1102
2	19	female	1	14	d	DV_178_C2_099.bmp	s	4606
2	19	female	1	15	s	C2_256_DV_256.bmp	d	3168
2	19	female	1	16	s	C2_278_DV_278.bmp	s	7085
2	19	female	1	17	d	DV_208_C2_183.bmp	d	3630
2	19	female	1	18	d	DV_154_C2_042.bmp	d	8889
2	19	female	1	19	d	DV_199_C2_125.bmp	s	4618
2	19	female	1	20	s	C2_257_DV_257.bmp	s	5030
2	19	female	1	21	d	DV_133_C2_139.bmp	d	1966
2	19	female	1	22	s	C2_291_DV_291.bmp	d	3692
2	19	female	1	23	d	C2_083_DV_108.bmp	d	2516
2	19	female	1	24	s	C2_258_DV_258.bmp	s	6323
2	19	female	1	25	d	DV_280_C2_003.bmp	d	3188
2	19	female	1	26	d	DV_170_C2_270.bmp	d	5273
2	19	female	1	27	s	DV_299_C2_299.bmp	d	1177
2	19	female	1	28	d	DV_295_C2_216.bmp	d	3589
2	19	female	1	29	s	C2_302_DV_302.bmp	s	4520
2	19	female	1	30	s	DV_265_C2_265.bmp	s	5150
2	19	female	1	31	d	DV_219_C2_135.bmp	d	2054
2	19	female	1	32	d	DV_277_C2_110.bmp	d	6471
2	19	female	1	33	s	C2_271_DV_271.bmp	s	5239
2	19	female	1	34	d	DV_238_C2_218.bmp	d	3619
2	19	female	1	35	s	DV_284_C2_284.bmp	s	1431
2	19	female	1	36	d	DV_217_C2_185.bmp	d	2035
2	19	female	1	37	d	DV_296_C2_235.bmp	d	5627
2	19	female	1	38	s	C2_294_DV_294.bmp	s	7847
2	19	female	1	39	s	DV_298_C2_298.bmp	s	2578
2	19	female	1	40	d	DV_203_C2_277.bmp	d	1885
2	19	female	2	1	s	C2_017_DV_017.bmp	d	2120
2	19	female	2	2	d	C2_041_DV_044.bmp	d	1680
2	19	female	2	3	d	C2_037_DV_085.bmp	s	4241
2	19	female	2	4	d	DV_303_C2_217.bmp	d	5316
2	19	female	2	5	d	C2_051_DV_238.bmp	d	1053
2	19	female	2	6	d	C2_018_DV_019.bmp	d	2191
2	19	female	2	7	d	DV_129_C2_092.bmp	d	5341
2	19	female	2	8	s	C2_025_DV_025.bmp	s	2412
2	19	female	2	9	s	DV_046_C2_046.bmp	s	9654
2	19	female	2	10	s	C2_061_DV_061.bmp	s	1538
2	19	female	2	11	d	C2_011_DV_049.bmp	d	2383
2	19	female	2	12	s	C2_056_DV_056.bmp	s	1013
2	19	female	2	13	s	C2_034_DV_034.bmp	s	777
2	19	female	2	14	s	C2_040_DV_040.bmp	d	956
2	19	female	2	15	d	C2_261_DV_201.bmp	d	1123
2	19	female	2	16	d	C2_024_DV_030.bmp	d	1113
2	19	female	2	17	d	C2_023_DV_304.bmp	s	1058
2	19	female	2	18	s	DV_062_C2_062.bmp	s	780
2	19	female	2	19	s	C2_007_DV_007.bmp	d	906
2	19	female	2	20	d	C2_050_DV_215.bmp	d	1392
2	19	female	2	21	d	C2_038_DV_081.bmp	d	2022
2	19	female	2	22	d	C2_010_DV_303.bmp	s	1242
2	19	female	2	23	s	C2_016_DV_016.bmp	d	579
2	19	female	2	24	s	DV_015_C2_015.bmp	d	1185
2	19	female	2	25	d	C2_007_DV_097.bmp	d	663
2	19	female	2	26	d	C2_012_DV_205.bmp	d	616
2	19	female	2	27	s	C2_028_DV_028.bmp	d	493
2	19	female	2	28	d	C2_004_DV_293.bmp	s	759
2	19	female	2	29	s	DV_029_C2_029.bmp	d	325
2	19	female	2	30	d	C2_021_DV_087.bmp	d	805
2	19	female	2	31	s	C2_036_DV_036.bmp	d	630
2	19	female	2	32	s	C2_035_DV_035.bmp	s	522
2	19	female	2	33	d	C2_039_DV_072.bmp	d	2602
2	19	female	2	34	s	C2_043_DV_043.bmp	d	559
2	19	female	2	35	d	C2_009_DV_033.bmp	d	804
2	19	female	2	36	d	C2_033_DV_180.bmp	d	3359
2	19	female	2	37	s	C2_005_DV_005.bmp	s	5883
2	19	female	2	38	s	C2_014_DV_014.bmp	s	3278
2	19	female	2	39	s	C2_054_DV_054.bmp	s	4135
2	19	female	2	40	s	C2_031_DV_031.bmp	s	1478
2	19	female	3	1	d	C2_002_DV_041.bmp	d	1751
2	19	female	3	2	s	DV_104_C2_104.bmp	s	1774
2	19	female	3	3	s	C2_063_DV_063.bmp	s	1008
2	19	female	3	4	s	C2_080_DV_080.bmp	s	1411
2	19	female	3	5	s	C2_066_DV_066.bmp	s	1089
2	19	female	3	6	d	C2_206_DV_077.bmp	d	2057
2	19	female	3	7	d	C2_098_DV_024.bmp	s	1779
2	19	female	3	8	d	C2_055_DV_059.bmp	d	615
2	19	female	3	9	d	C2_182_DV_184.bmp	s	379
2	19	female	3	10	s	C2_073_DV_073.bmp	s	137
2	19	female	3	11	d	C2_057_DV_067.bmp	s	1156
2	19	female	3	12	s	C2_102_DV_102.bmp	s	1172
2	19	female	3	13	s	C2_101_DV_101.bmp	d	568
2	19	female	3	14	s	DV_064_C2_064.bmp	s	863
2	19	female	3	15	s	DV_089_C2_089.bmp	d	1878
2	19	female	3	16	d	C2_095_DV_229.bmp	d	3296
2	19	female	3	17	s	C2_069_DV_069.bmp	s	1695
2	19	female	3	18	s	C2_082_DV_082.bmp	s	695
2	19	female	3	19	s	C2_065_DV_065.bmp	s	554
2	19	female	3	20	d	C2_108_DV_282.bmp	d	840
2	19	female	3	21	d	C2_143_DV_254.bmp	s	354
2	19	female	3	22	s	DV_086_C2_086.bmp	s	786
2	19	female	3	23	d	C2_117_DV_219.bmp	d	1654
2	19	female	3	24	s	C2_071_DV_071.bmp	s	610
2	19	female	3	25	d	C2_218_DV_109.bmp	d	270
2	19	female	3	26	d	C2_174_DV_183.bmp	s	255
2	19	female	3	27	s	C2_078_DV_078.bmp	s	42
2	19	female	3	28	s	DV_100_C2_100.bmp	s	211
2	19	female	3	29	d	C2_171_DV_185.bmp	d	246
2	19	female	3	30	s	C2_084_DV_084.bmp	s	31
2	19	female	3	31	d	C2_139_DV_120.bmp	s	707
2	19	female	3	32	d	C2_076_DV_051.bmp	d	285
2	19	female	3	33	d	C2_091_DV_283.bmp	s	238
2	19	female	3	34	d	C2_070_DV_012.bmp	s	207
2	19	female	3	35	s	DV_103_C2_103.bmp	s	261
2	19	female	3	36	d	C2_211_DV_128.bmp	s	215
2	19	female	3	37	d	C2_123_DV_223.bmp	d	1059
2	19	female	3	38	s	C2_079_DV_079.bmp	s	608
2	19	female	3	39	s	C2_068_DV_068.bmp	s	373
2	19	female	3	40	d	C2_092_DV_227.bmp	s	617
2	19	female	4	1	d	C2_242_DV_246.bmp	s	851
2	19	female	4	2	s	DV_111_C2_111.bmp	d	620
2	19	female	4	3	d	C2_246_DV_160.bmp	d	1825
2	19	female	4	4	s	C2_113_DV_113.bmp	d	1039
2	19	female	4	5	s	C2_144_DV_144.bmp	s	374
2	19	female	4	6	s	C2_131_DV_131.bmp	s	262
2	19	female	4	7	d	C2_266_DV_227.bmp	d	385
2	19	female	4	8	s	DV_147_C2_147.bmp	s	253
2	19	female	4	9	s	C2_119_DV_119.bmp	s	328
2	19	female	4	10	s	C2_134_DV_134.bmp	d	807
2	19	female	4	11	d	C2_249_DV_083.bmp	s	323
2	19	female	4	12	s	DV_141_C2_141.bmp	s	288
2	19	female	4	13	s	C2_105_DV_105.bmp	d	393
2	19	female	4	14	d	C2_261_DV_287.bmp	d	899
2	19	female	4	15	d	DV_020_C2_090.bmp	s	1119
2	19	female	4	16	d	DV_037_C2_303.bmp	s	1406
2	19	female	4	17	d	C2_252_DV_125.bmp	d	849
2	19	female	4	18	d	C2_239_DV_114.bmp	s	326
2	19	female	4	19	d	C2_232_DV_048.bmp	s	299
2	19	female	4	20	d	DV_013_C2_235.bmp	s	362
2	19	female	4	21	d	C2_240_DV_044.bmp	d	675
2	19	female	4	22	s	DV_137_C2_137.bmp	s	330
2	19	female	4	23	s	DV_118_C2_118.bmp	s	233
2	19	female	4	24	d	DV_032_C2_153.bmp	s	307
2	19	female	4	25	s	C2_112_DV_112.bmp	s	380
2	19	female	4	26	d	C2_003_DV_018.bmp	d	298
2	19	female	4	27	d	DV_012_C2_205.bmp	s	209
2	19	female	4	28	d	C2_289_DV_039.bmp	s	291
2	19	female	4	29	s	DV_127_C2_127.bmp	s	1253
2	19	female	4	30	s	C2_142_DV_142.bmp	s	1159
2	19	female	4	31	s	C2_152_DV_152.bmp	s	343
2	19	female	4	32	s	C2_116_DV_116.bmp	d	715
2	19	female	4	33	s	C2_115_DV_115.bmp	s	324
2	19	female	4	34	s	C2_124_DV_124.bmp	s	1563
2	19	female	4	35	s	C2_140_DV_140.bmp	s	577
2	19	female	4	36	d	DV_024_C2_085.bmp	s	428
2	19	female	4	37	d	C2_304_DV_099.bmp	d	1377
2	19	female	4	38	s	C2_146_DV_146.bmp	s	246
2	19	female	4	39	d	C2_223_DV_242.bmp	s	319
2	19	female	4	40	d	DV_009_C2_180.bmp	d	377
2	19	female	5	1	s	DV_167_C2_167.bmp	s	789
2	19	female	5	2	s	DV_204_C2_204.bmp	s	575
2	19	female	5	3	s	C2_158_DV_158.bmp	s	884
2	19	female	5	4	s	DV_222_C2_222.bmp	s	1007
2	19	female	5	5	s	DV_190_C2_190.bmp	s	1395
2	19	female	5	6	d	DV_053_C2_208.bmp	d	919
2	19	female	5	7	d	DV_130_C2_253.bmp	d	1007
2	19	female	5	8	s	C2_194_DV_194.bmp	s	690
2	19	female	5	9	d	DV_109_C2_268.bmp	s	417
2	19	female	5	10	d	DV_160_C2_154.bmp	d	285
2	19	female	5	11	s	C2_157_DV_157.bmp	d	406
2	19	female	5	12	d	DV_091_C2_211.bmp	d	999
2	19	female	5	13	s	C2_207_DV_207.bmp	s	1109
2	19	female	5	14	s	DV_214_C2_214.bmp	s	918
2	19	female	5	15	d	DV_052_C2_264.bmp	s	870
2	19	female	5	16	d	DV_074_C2_075.bmp	s	944
2	19	female	5	17	s	C2_155_DV_155.bmp	s	1934
2	19	female	5	18	s	C2_226_DV_226.bmp	s	817
2	19	female	5	19	d	DV_039_C2_296.bmp	d	912
2	19	female	5	20	s	DV_200_C2_200.bmp	d	840
2	19	female	5	21	d	DV_045_C2_027.bmp	s	595
2	19	female	5	22	s	C2_243_DV_243.bmp	s	1206
2	19	female	5	23	d	DV_126_C2_076.bmp	s	1131
2	19	female	5	24	s	C2_181_Dv_181.bmp	s	586
2	19	female	5	25	d	DV_120_C2_133.bmp	d	951
2	19	female	5	26	d	DV_114_C2_126.bmp	s	437
2	19	female	5	27	s	DV_248_C2_248.bmp	s	337
2	19	female	5	28	d	DV_094_C2_022.bmp	s	540
2	19	female	5	29	s	DV_231_C2_231.bmp	s	1259
2	19	female	5	30	d	DV_132_C2_210.bmp	s	1725
2	19	female	5	31	s	C2_247_DV_247.bmp	s	979
2	19	female	5	32	d	DV_129_C2_199.bmp	d	1601
2	19	female	5	33	d	DV_108_C2_038.bmp	d	1166
2	19	female	5	34	d	DV_048_C2_175.bmp	d	801
2	19	female	5	35	s	DV_166_C2_166.bmp	s	2105
2	19	female	5	36	s	DV_161_C2_161.bmp	s	904
2	19	female	5	37	d	DV_088_C2_295.bmp	d	1234
2	19	female	5	38	d	DV_178_C2_060.bmp	s	709
2	19	female	5	39	s	C2_172_DV_172.bmp	d	333
2	19	female	5	40	d	DV_081_C2_282.bmp	s	1236
2	19	female	6	1	d	DV_254_C2_287.bmp	s	6770
2	19	female	6	2	d	DV_295_C2_216.bmp	d	1682
2	19	female	6	3	d	DV_170_C2_270.bmp	s	781
2	19	female	6	4	s	DV_265_C2_265.bmp	s	1788
2	19	female	6	5	s	C2_290_DV_290.bmp	s	1307
2	19	female	6	6	d	DV_217_C2_185.bmp	s	1541
2	19	female	6	7	d	DV_277_C2_110.bmp	d	1783
2	19	female	6	8	s	C2_271_DV_271.bmp	s	1062
2	19	female	6	9	d	DV_208_C2_183.bmp	d	1098
2	19	female	6	10	d	DV_133_C2_139.bmp	s	1461
2	19	female	6	11	s	DV_299_C2_299.bmp	s	1369
2	19	female	6	12	d	DV_280_C2_003.bmp	d	1089
2	19	female	6	13	s	DV_286_C2_286.bmp	s	1420
2	19	female	6	14	s	DV_259_C2_259.bmp	s	1514
2	19	female	6	15	d	DV_237_C2_297.bmp	s	2252
2	19	female	6	16	d	DV_238_C2_218.bmp	d	1489
2	19	female	6	17	d	DV_154_C2_042.bmp	d	2340
2	19	female	6	18	d	DV_296_C2_235.bmp	d	1461
2	19	female	6	19	s	C2_288_DV_288.bmp	s	1033
2	19	female	6	20	s	C2_294_DV_294.bmp	s	1279
2	19	female	6	21	s	DV_300_C2_300.bmp	s	938
2	19	female	6	22	d	DV_199_C2_125.bmp	d	771
2	19	female	6	23	s	DV_267_C2_267.bmp	s	315
2	19	female	6	24	s	C2_256_DV_256.bmp	s	349
2	19	female	6	25	s	C2_291_DV_291.bmp	d	1222
2	19	female	6	26	s	C2_257_DV_257.bmp	d	1899
2	19	female	6	27	s	C2_278_DV_278.bmp	d	1150
2	19	female	6	28	d	C2_008_DV_039.bmp	s	1398
2	19	female	6	29	d	DV_132_C2_168.bmp	s	1237
2	19	female	6	30	s	DV_298_C2_298.bmp	s	930
2	19	female	6	31	d	DV_178_C2_099.bmp	d	1428
2	19	female	6	32	s	DV_284_C2_284.bmp	s	1921
2	19	female	6	33	s	DV_274_C2_274.bmp	s	1291
2	19	female	6	34	s	C2_260_DV_260.bmp	s	974
2	19	female	6	35	s	C2_258_DV_258.bmp	s	910
2	19	female	6	36	d	DV_203_C2_277.bmp	d	4465
2	19	female	6	37	d	DV_244_C2_042.bmp	d	1077
2	19	female	6	38	s	C2_302_DV_302.bmp	s	1081
2	19	female	6	39	d	C2_083_DV_108.bmp	s	1372
2	19	female	6	40	d	DV_219_C2_135.bmp	s	1028
2	19	female	7	1	d	C2_051_DV_238.bmp	d	826
2	19	female	7	2	s	C2_028_DV_028.bmp	d	1008
2	19	female	7	3	s	DV_062_C2_062.bmp	s	766
2	19	female	7	4	d	C2_037_DV_085.bmp	s	1781
2	19	female	7	5	s	C2_035_DV_035.bmp	s	789
2	19	female	7	6	s	C2_034_DV_034.bmp	d	1684
2	19	female	7	7	s	C2_054_DV_054.bmp	d	1863
2	19	female	7	8	d	C2_009_DV_033.bmp	d	1275
2	19	female	7	9	d	DV_129_C2_092.bmp	s	919
2	19	female	7	10	d	DV_303_C2_217.bmp	d	985
2	19	female	7	11	d	C2_021_DV_087.bmp	s	945
2	19	female	7	12	d	C2_024_DV_030.bmp	d	1961
2	19	female	7	13	s	C2_014_DV_014.bmp	s	4433
2	19	female	7	14	d	C2_038_DV_081.bmp	s	807
2	19	female	7	15	d	C2_012_DV_205.bmp	d	749
2	19	female	7	16	d	C2_261_DV_201.bmp	s	278
2	19	female	7	17	s	C2_031_DV_031.bmp	s	289
2	19	female	7	18	d	C2_007_DV_097.bmp	d	725
2	19	female	7	19	d	C2_033_DV_180.bmp	d	1159
2	19	female	7	20	d	C2_011_DV_049.bmp	d	1160
2	19	female	7	21	s	C2_016_DV_016.bmp	s	744
2	19	female	7	22	d	C2_023_DV_304.bmp	d	626
2	19	female	7	23	s	C2_056_DV_056.bmp	s	800
2	19	female	7	24	s	C2_007_DV_007.bmp	d	1022
2	19	female	7	25	s	DV_015_C2_015.bmp	s	1803
2	19	female	7	26	s	DV_029_C2_029.bmp	s	1322
2	19	female	7	27	s	C2_061_DV_061.bmp	s	796
2	19	female	7	28	d	C2_010_DV_303.bmp	d	1195
2	19	female	7	29	s	C2_040_DV_040.bmp	d	2513
2	19	female	7	30	s	C2_017_DV_017.bmp	s	1123
2	19	female	7	31	s	C2_036_DV_036.bmp	s	813
2	19	female	7	32	d	C2_041_DV_044.bmp	d	987
2	19	female	7	33	s	C2_043_DV_043.bmp	s	4835
2	19	female	7	34	s	C2_025_DV_025.bmp	s	1936
2	19	female	7	35	d	C2_050_DV_215.bmp	s	801
2	19	female	7	36	d	C2_018_DV_019.bmp	s	776
2	19	female	7	37	d	C2_004_DV_293.bmp	d	680
2	19	female	7	38	d	C2_039_DV_072.bmp	s	603
2	19	female	7	39	s	C2_005_DV_005.bmp	s	458
2	19	female	7	40	s	DV_046_C2_046.bmp	d	911
2	19	female	8	1	d	C2_211_DV_128.bmp	s	233
2	19	female	8	2	s	DV_100_C2_100.bmp	s	191
2	19	female	8	3	s	C2_079_DV_079.bmp	s	206
2	19	female	8	4	d	C2_206_DV_077.bmp	s	173
2	19	female	8	5	d	C2_091_DV_283.bmp	s	165
2	19	female	8	6	d	C2_055_DV_059.bmp	s	165
2	19	female	8	7	d	C2_092_DV_227.bmp	s	93
2	19	female	8	8	d	C2_174_DV_183.bmp	s	407
2	19	female	8	9	s	C2_071_DV_071.bmp	s	334
2	19	female	8	10	s	DV_064_C2_064.bmp	s	87
2	19	female	8	11	d	C2_139_DV_120.bmp	s	370
2	19	female	8	12	s	C2_080_DV_080.bmp	s	210
2	19	female	8	13	s	C2_069_DV_069.bmp	s	225
2	19	female	8	14	d	C2_108_DV_282.bmp	s	215
2	19	female	8	15	s	C2_101_DV_101.bmp	s	173
2	19	female	8	16	s	C2_066_DV_066.bmp	s	157
2	19	female	8	17	s	DV_086_C2_086.bmp	s	78
2	19	female	8	18	d	C2_123_DV_223.bmp	s	1
2	19	female	8	19	s	C2_082_DV_082.bmp	s	376
2	19	female	8	20	s	DV_103_C2_103.bmp	s	2288
2	19	female	8	21	s	C2_084_DV_084.bmp	s	787
2	19	female	8	22	s	C2_078_DV_078.bmp	s	618
2	19	female	8	23	d	C2_182_DV_184.bmp	s	504
2	19	female	8	24	s	C2_073_DV_073.bmp	d	955
2	19	female	8	25	s	DV_089_C2_089.bmp	s	708
2	19	female	8	26	d	C2_070_DV_012.bmp	d	1102
2	19	female	8	27	d	C2_143_DV_254.bmp	s	2593
2	19	female	8	28	d	C2_057_DV_067.bmp	s	1288
2	19	female	8	29	d	C2_117_DV_219.bmp	s	1652
2	19	female	8	30	s	DV_104_C2_104.bmp	s	880
2	19	female	8	31	d	C2_095_DV_229.bmp	s	1180
2	19	female	8	32	s	C2_063_DV_063.bmp	s	739
2	19	female	8	33	d	C2_218_DV_109.bmp	s	652
2	19	female	8	34	d	C2_171_DV_185.bmp	s	552
2	19	female	8	35	s	C2_102_DV_102.bmp	s	361
2	19	female	8	36	s	C2_065_DV_065.bmp	s	369
2	19	female	8	37	d	C2_002_DV_041.bmp	s	305
2	19	female	8	38	s	C2_068_DV_068.bmp	s	395
2	19	female	8	39	d	C2_076_DV_051.bmp	s	258
2	19	female	8	40	d	C2_098_DV_024.bmp	s	303
2	19	female	9	1	d	C2_266_DV_227.bmp	s	257
2	19	female	9	2	s	DV_137_C2_137.bmp	s	382
2	19	female	9	3	d	C2_239_DV_114.bmp	s	253
2	19	female	9	4	d	C2_249_DV_083.bmp	s	738
2	19	female	9	5	s	C2_113_DV_113.bmp	s	443
2	19	female	9	6	s	C2_115_DV_115.bmp	s	369
2	19	female	9	7	s	C2_112_DV_112.bmp	s	601
2	19	female	9	8	s	C2_116_DV_116.bmp	s	631
2	19	female	9	9	s	DV_141_C2_141.bmp	s	317
2	19	female	9	10	s	C2_105_DV_105.bmp	s	463
2	19	female	9	11	s	C2_124_DV_124.bmp	s	307
2	19	female	9	12	s	C2_140_DV_140.bmp	s	485
2	19	female	9	13	d	C2_240_DV_044.bmp	s	545
2	19	female	9	14	s	DV_127_C2_127.bmp	s	529
2	19	female	9	15	d	C2_003_DV_018.bmp	s	323
2	19	female	9	16	s	C2_146_DV_146.bmp	s	501
2	19	female	9	17	d	DV_032_C2_153.bmp	s	447
2	19	female	9	18	d	DV_013_C2_235.bmp	d	868
2	19	female	9	19	s	C2_144_DV_144.bmp	d	2152
2	19	female	9	20	d	C2_242_DV_246.bmp	s	985
2	19	female	9	21	d	DV_037_C2_303.bmp	s	752
2	19	female	9	22	s	DV_111_C2_111.bmp	s	865
2	19	female	9	23	d	C2_252_DV_125.bmp	d	2140
2	19	female	9	24	d	DV_020_C2_090.bmp	d	901
2	19	female	9	25	d	DV_009_C2_180.bmp	s	384
2	19	female	9	26	s	C2_142_DV_142.bmp	s	639
2	19	female	9	27	d	DV_024_C2_085.bmp	d	996
2	19	female	9	28	s	DV_118_C2_118.bmp	s	563
2	19	female	9	29	s	C2_152_DV_152.bmp	s	459
2	19	female	9	30	d	C2_261_DV_287.bmp	s	528
2	19	female	9	31	s	C2_134_DV_134.bmp	s	1457
2	19	female	9	32	d	C2_304_DV_099.bmp	d	3206
2	19	female	9	33	d	C2_246_DV_160.bmp	s	357
2	19	female	9	34	d	C2_223_DV_242.bmp	s	309
2	19	female	9	35	s	C2_131_DV_131.bmp	d	336
2	19	female	9	36	d	C2_232_DV_048.bmp	s	257
2	19	female	9	37	s	C2_119_DV_119.bmp	s	206
2	19	female	9	38	d	C2_289_DV_039.bmp	s	245
2	19	female	9	39	d	DV_012_C2_205.bmp	s	225
2	19	female	9	40	s	DV_147_C2_147.bmp	s	183
2	19	female	10	1	s	C2_247_DV_247.bmp	s	199
2	19	female	10	2	s	C2_158_DV_158.bmp	s	245
2	19	female	10	3	d	DV_091_C2_211.bmp	s	266
2	19	female	10	4	d	DV_109_C2_268.bmp	d	974
2	19	female	10	5	s	DV_248_C2_248.bmp	s	526
2	19	female	10	6	s	DV_200_C2_200.bmp	d	704
2	19	female	10	7	d	DV_048_C2_175.bmp	d	1099
2	19	female	10	8	s	C2_194_DV_194.bmp	s	1349
2	19	female	10	9	s	DV_167_C2_167.bmp	s	805
2	19	female	10	10	s	C2_172_DV_172.bmp	s	676
2	19	female	10	11	s	C2_181_Dv_181.bmp	s	360
2	19	female	10	12	s	C2_243_DV_243.bmp	s	272
2	19	female	10	13	d	DV_114_C2_126.bmp	s	260
2	19	female	10	14	d	DV_039_C2_296.bmp	s	296
2	19	female	10	15	s	DV_214_C2_214.bmp	s	323
2	19	female	10	16	s	C2_226_DV_226.bmp	s	613
2	19	female	10	17	s	C2_207_DV_207.bmp	s	603
2	19	female	10	18	d	DV_052_C2_264.bmp	s	682
2	19	female	10	19	d	DV_120_C2_133.bmp	s	501
2	19	female	10	20	d	DV_088_C2_295.bmp	s	384
2	19	female	10	21	s	C2_157_DV_157.bmp	s	407
2	19	female	10	22	d	DV_130_C2_253.bmp	s	382
2	19	female	10	23	d	DV_094_C2_022.bmp	s	965
2	19	female	10	24	d	DV_178_C2_060.bmp	s	629
2	19	female	10	25	d	DV_160_C2_154.bmp	s	618
2	19	female	10	26	s	DV_204_C2_204.bmp	d	928
2	19	female	10	27	d	DV_126_C2_076.bmp	s	674
2	19	female	10	28	s	DV_190_C2_190.bmp	s	894
2	19	female	10	29	s	DV_161_C2_161.bmp	s	1113
2	19	female	10	30	d	DV_074_C2_075.bmp	s	763
2	19	female	10	31	s	DV_166_C2_166.bmp	s	915
2	19	female	10	32	s	DV_231_C2_231.bmp	s	613
2	19	female	10	33	s	DV_222_C2_222.bmp	s	627
2	19	female	10	34	d	DV_045_C2_027.bmp	s	609
2	19	female	10	35	d	DV_132_C2_210.bmp	s	920
2	19	female	10	36	d	DV_053_C2_208.bmp	s	634
2	19	female	10	37	d	DV_108_C2_038.bmp	s	702
2	19	female	10	38	d	DV_081_C2_282.bmp	s	1537
2	19	female	10	39	d	DV_129_C2_199.bmp	s	2642
2	19	female	10	40	s	C2_155_DV_155.bmp	s	831
2	19	female	11	1	s	DV_274_C2_274.bmp	s	2358
2	19	female	11	2	d	DV_170_C2_270.bmp	d	2598
2	19	female	11	3	d	C2_083_DV_108.bmp	s	1044
2	19	female	11	4	d	DV_178_C2_099.bmp	s	889
2	19	female	11	5	s	DV_267_C2_267.bmp	s	3668
2	19	female	11	6	d	DV_238_C2_218.bmp	s	1184
2	19	female	11	7	s	C2_288_DV_288.bmp	d	1216
2	19	female	11	8	d	DV_244_C2_042.bmp	d	982
2	19	female	11	9	d	DV_295_C2_216.bmp	d	1925
2	19	female	11	10	d	DV_208_C2_183.bmp	d	1279
2	19	female	11	11	d	DV_296_C2_235.bmp	s	658
2	19	female	11	12	d	DV_154_C2_042.bmp	d	759
2	19	female	11	13	s	DV_284_C2_284.bmp	s	992
2	19	female	11	14	s	C2_257_DV_257.bmp	s	695
2	19	female	11	15	d	DV_133_C2_139.bmp	s	1338
2	19	female	11	16	d	C2_008_DV_039.bmp	s	819
2	19	female	11	17	d	DV_219_C2_135.bmp	s	897
2	19	female	11	18	s	C2_290_DV_290.bmp	s	844
2	19	female	11	19	d	DV_217_C2_185.bmp	s	873
2	19	female	11	20	d	DV_277_C2_110.bmp	d	885
2	19	female	11	21	s	DV_300_C2_300.bmp	s	928
2	19	female	11	22	d	DV_237_C2_297.bmp	s	738
2	19	female	11	23	s	C2_302_DV_302.bmp	s	738
2	19	female	11	24	d	DV_203_C2_277.bmp	d	843
2	19	female	11	25	s	C2_271_DV_271.bmp	s	761
2	19	female	11	26	d	DV_132_C2_168.bmp	s	697
2	19	female	11	27	s	DV_259_C2_259.bmp	d	1027
2	19	female	11	28	d	DV_254_C2_287.bmp	s	681
2	19	female	11	29	s	C2_256_DV_256.bmp	s	788
2	19	female	11	30	s	C2_294_DV_294.bmp	s	883
2	19	female	11	31	d	DV_199_C2_125.bmp	s	1479
2	19	female	11	32	s	DV_265_C2_265.bmp	s	2162
2	19	female	11	33	s	C2_258_DV_258.bmp	s	858
2	19	female	11	34	s	C2_291_DV_291.bmp	d	1103
2	19	female	11	35	d	DV_280_C2_003.bmp	d	1689
2	19	female	11	36	s	DV_298_C2_298.bmp	s	2173
2	19	female	11	37	s	C2_278_DV_278.bmp	s	861
2	19	female	11	38	s	DV_286_C2_286.bmp	s	697
2	19	female	11	39	s	C2_260_DV_260.bmp	s	708
2	19	female	11	40	s	DV_299_C2_299.bmp	s	1494
2	19	female	12	1	s	C2_017_DV_017.bmp	s	2738
2	19	female	12	2	s	C2_056_DV_056.bmp	s	771
2	19	female	12	3	s	C2_061_DV_061.bmp	s	587
2	19	female	12	4	s	C2_040_DV_040.bmp	s	657
2	19	female	12	5	s	C2_016_DV_016.bmp	s	1142
2	19	female	12	6	d	C2_018_DV_019.bmp	s	831
2	19	female	12	7	s	C2_054_DV_054.bmp	d	853
2	19	female	12	8	d	C2_012_DV_205.bmp	s	945
2	19	female	12	9	s	C2_043_DV_043.bmp	s	794
2	19	female	12	10	s	C2_007_DV_007.bmp	s	857
2	19	female	12	11	d	C2_010_DV_303.bmp	d	1870
2	19	female	12	12	s	C2_031_DV_031.bmp	s	778
2	19	female	12	13	s	DV_029_C2_029.bmp	s	769
2	19	female	12	14	s	C2_034_DV_034.bmp	d	1457
2	19	female	12	15	d	C2_038_DV_081.bmp	s	1134
2	19	female	12	16	d	C2_021_DV_087.bmp	s	1207
2	19	female	12	17	s	DV_015_C2_015.bmp	d	974
2	19	female	12	18	d	DV_129_C2_092.bmp	s	438
2	19	female	12	19	d	C2_039_DV_072.bmp	s	315
2	19	female	12	20	d	C2_007_DV_097.bmp	s	285
2	19	female	12	21	d	C2_023_DV_304.bmp	s	313
2	19	female	12	22	d	C2_051_DV_238.bmp	s	147
2	19	female	12	23	s	C2_028_DV_028.bmp	s	147
2	19	female	12	24	d	C2_004_DV_293.bmp	s	284
2	19	female	12	25	d	C2_261_DV_201.bmp	s	319
2	19	female	12	26	s	C2_036_DV_036.bmp	s	1001
2	19	female	12	27	s	DV_062_C2_062.bmp	s	1128
2	19	female	12	28	d	C2_024_DV_030.bmp	s	809
2	19	female	12	29	s	C2_005_DV_005.bmp	s	680
2	19	female	12	30	s	C2_014_DV_014.bmp	s	1202
2	19	female	12	31	d	C2_041_DV_044.bmp	d	977
2	19	female	12	32	d	C2_050_DV_215.bmp	s	3961
2	19	female	12	33	d	DV_303_C2_217.bmp	s	1065
2	19	female	12	34	d	C2_009_DV_033.bmp	d	829
2	19	female	12	35	s	C2_025_DV_025.bmp	s	1538
2	19	female	12	36	s	DV_046_C2_046.bmp	s	692
2	19	female	12	37	d	C2_033_DV_180.bmp	s	1407
2	19	female	12	38	d	C2_011_DV_049.bmp	d	1382
2	19	female	12	39	s	C2_035_DV_035.bmp	s	741
2	19	female	12	40	d	C2_037_DV_085.bmp	s	454
2	19	female	13	1	d	C2_091_DV_283.bmp	s	579
2	19	female	13	2	s	DV_104_C2_104.bmp	s	618
2	19	female	13	3	s	DV_103_C2_103.bmp	s	656
2	19	female	13	4	d	C2_070_DV_012.bmp	s	861
2	19	female	13	5	d	C2_055_DV_059.bmp	s	681
2	19	female	13	6	d	C2_117_DV_219.bmp	d	1532
2	19	female	13	7	d	C2_211_DV_128.bmp	s	886
2	19	female	13	8	d	C2_108_DV_282.bmp	s	745
2	19	female	13	9	d	C2_171_DV_185.bmp	s	666
2	19	female	13	10	s	C2_079_DV_079.bmp	s	718
2	19	female	13	11	d	C2_092_DV_227.bmp	s	615
2	19	female	13	12	s	DV_064_C2_064.bmp	s	677
2	19	female	13	13	d	C2_098_DV_024.bmp	d	696
2	19	female	13	14	d	C2_123_DV_223.bmp	s	1027
2	19	female	13	15	d	C2_076_DV_051.bmp	s	777
2	19	female	13	16	d	C2_095_DV_229.bmp	s	689
2	19	female	13	17	s	C2_073_DV_073.bmp	s	1036
2	19	female	13	18	s	DV_086_C2_086.bmp	s	817
2	19	female	13	19	d	C2_174_DV_183.bmp	s	1095
2	19	female	13	20	s	DV_100_C2_100.bmp	d	746
2	19	female	13	21	s	C2_101_DV_101.bmp	s	1163
2	19	female	13	22	s	DV_089_C2_089.bmp	s	875
2	19	female	13	23	s	C2_080_DV_080.bmp	d	823
2	19	female	13	24	s	C2_102_DV_102.bmp	s	741
2	19	female	13	25	d	C2_139_DV_120.bmp	s	838
2	19	female	13	26	s	C2_065_DV_065.bmp	s	827
2	19	female	13	27	d	C2_057_DV_067.bmp	s	769
2	19	female	13	28	d	C2_182_DV_184.bmp	s	977
2	19	female	13	29	d	C2_206_DV_077.bmp	d	905
2	19	female	13	30	s	C2_071_DV_071.bmp	s	883
2	19	female	13	31	s	C2_063_DV_063.bmp	s	647
2	19	female	13	32	s	C2_066_DV_066.bmp	s	883
2	19	female	13	33	s	C2_069_DV_069.bmp	s	743
2	19	female	13	34	s	C2_084_DV_084.bmp	s	680
2	19	female	13	35	d	C2_143_DV_254.bmp	s	2418
2	19	female	13	36	d	C2_218_DV_109.bmp	d	1625
2	19	female	13	37	s	C2_082_DV_082.bmp	s	943
2	19	female	13	38	s	C2_078_DV_078.bmp	s	1304
2	19	female	13	39	s	C2_068_DV_068.bmp	s	811
2	19	female	13	40	d	C2_002_DV_041.bmp	s	1473
2	19	female	14	1	d	C2_266_DV_227.bmp	s	741
2	19	female	14	2	s	C2_105_DV_105.bmp	s	959
2	19	female	14	3	d	C2_242_DV_246.bmp	s	879
2	19	female	14	4	d	C2_252_DV_125.bmp	s	1755
2	19	female	14	5	d	C2_223_DV_242.bmp	s	1579
2	19	female	14	6	d	C2_240_DV_044.bmp	s	843
2	19	female	14	7	s	C2_115_DV_115.bmp	s	904
2	19	female	14	8	s	C2_116_DV_116.bmp	s	1123
2	19	female	14	9	s	DV_141_C2_141.bmp	s	677
2	19	female	14	10	d	DV_024_C2_085.bmp	s	1097
2	19	female	14	11	d	C2_246_DV_160.bmp	s	867
2	19	female	14	12	d	C2_261_DV_287.bmp	d	1751
2	19	female	14	13	s	C2_131_DV_131.bmp	s	1176
2	19	female	14	14	d	DV_013_C2_235.bmp	s	800
2	19	female	14	15	s	C2_134_DV_134.bmp	s	639
2	19	female	14	16	s	DV_137_C2_137.bmp	s	1571
2	19	female	14	17	d	DV_020_C2_090.bmp	d	1139
2	19	female	14	18	s	C2_152_DV_152.bmp	s	1860
2	19	female	14	19	d	DV_009_C2_180.bmp	d	1633
2	19	female	14	20	s	DV_127_C2_127.bmp	s	1918
2	19	female	14	21	s	C2_140_DV_140.bmp	d	1296
2	19	female	14	22	d	C2_249_DV_083.bmp	s	835
2	19	female	14	23	s	DV_118_C2_118.bmp	s	880
2	19	female	14	24	d	C2_232_DV_048.bmp	s	1012
2	19	female	14	25	s	C2_146_DV_146.bmp	s	2778
2	19	female	14	26	d	DV_012_C2_205.bmp	s	1537
2	19	female	14	27	s	C2_124_DV_124.bmp	d	2594
2	19	female	14	28	s	DV_147_C2_147.bmp	s	641
2	19	female	14	29	s	C2_119_DV_119.bmp	s	694
2	19	female	14	30	s	C2_113_DV_113.bmp	s	658
2	19	female	14	31	s	C2_142_DV_142.bmp	s	1902
2	19	female	14	32	d	C2_239_DV_114.bmp	s	2409
2	19	female	14	33	d	C2_289_DV_039.bmp	s	6223
2	19	female	14	34	d	DV_037_C2_303.bmp	s	637
2	19	female	14	35	d	C2_304_DV_099.bmp	d	42
2	19	female	14	36	s	C2_112_DV_112.bmp	s	7
2	19	female	14	37	d	DV_032_C2_153.bmp	s	54
2	19	female	14	38	s	DV_111_C2_111.bmp	s	435
2	19	female	14	39	s	C2_144_DV_144.bmp	s	208
2	19	female	14	40	d	C2_003_DV_018.bmp	s	223
2	19	female	15	1	s	C2_172_DV_172.bmp	s	373
2	19	female	15	2	d	DV_114_C2_126.bmp	s	325
2	19	female	15	3	s	C2_181_Dv_181.bmp	s	495
2	19	female	15	4	d	DV_109_C2_268.bmp	s	481
2	19	female	15	5	d	DV_160_C2_154.bmp	d	501
2	19	female	15	6	s	DV_166_C2_166.bmp	s	671
2	19	female	15	7	d	DV_088_C2_295.bmp	d	787
2	19	female	15	8	s	C2_157_DV_157.bmp	s	1331
2	19	female	15	9	s	DV_190_C2_190.bmp	s	580
2	19	female	15	10	s	C2_155_DV_155.bmp	s	915
2	19	female	15	11	s	DV_161_C2_161.bmp	d	1773
2	19	female	15	12	d	DV_094_C2_022.bmp	d	1045
2	19	female	15	13	d	DV_108_C2_038.bmp	s	594
2	19	female	15	14	d	DV_052_C2_264.bmp	s	729
2	19	female	15	15	d	DV_120_C2_133.bmp	s	531
2	19	female	15	16	s	DV_248_C2_248.bmp	s	508
2	19	female	15	17	d	DV_048_C2_175.bmp	s	439
2	19	female	15	18	s	C2_226_DV_226.bmp	d	1236
2	19	female	15	19	s	C2_158_DV_158.bmp	s	585
2	19	female	15	20	s	C2_243_DV_243.bmp	s	512
2	19	female	15	21	s	C2_247_DV_247.bmp	s	490
2	19	female	15	22	d	DV_129_C2_199.bmp	s	781
2	19	female	15	23	d	DV_130_C2_253.bmp	d	1620
2	19	female	15	24	s	DV_204_C2_204.bmp	s	330
2	19	female	15	25	d	DV_081_C2_282.bmp	s	332
2	19	female	15	26	s	C2_207_DV_207.bmp	s	317
2	19	female	15	27	d	DV_074_C2_075.bmp	s	303
2	19	female	15	28	d	DV_039_C2_296.bmp	s	266
2	19	female	15	29	d	DV_178_C2_060.bmp	s	590
2	19	female	15	30	s	DV_200_C2_200.bmp	s	661
2	19	female	15	31	d	DV_045_C2_027.bmp	s	905
2	19	female	15	32	d	DV_053_C2_208.bmp	s	1172
2	19	female	15	33	d	DV_132_C2_210.bmp	d	2156
2	19	female	15	34	s	DV_222_C2_222.bmp	s	685
2	19	female	15	35	d	DV_126_C2_076.bmp	s	704
2	19	female	15	36	s	DV_167_C2_167.bmp	s	1035
2	19	female	15	37	d	DV_091_C2_211.bmp	s	1128
2	19	female	15	38	s	DV_214_C2_214.bmp	s	657
2	19	female	15	39	s	C2_194_DV_194.bmp	s	542
2	19	female	15	40	s	DV_231_C2_231.bmp	s	503
2	19	female	16	1	s	DV_274_C2_274.bmp	s	67366
2	19	female	16	2	s	DV_286_C2_286.bmp	s	1302
2	19	female	16	3	s	C2_278_DV_278.bmp	s	600
2	19	female	16	4	s	DV_299_C2_299.bmp	s	503
2	19	female	16	5	d	DV_132_C2_168.bmp	s	298
2	19	female	16	6	s	C2_257_DV_257.bmp	d	380
2	19	female	16	7	d	DV_295_C2_216.bmp	d	948
2	19	female	16	8	s	DV_265_C2_265.bmp	s	1100
2	19	female	16	9	d	C2_008_DV_039.bmp	d	1751
2	19	female	16	10	d	DV_170_C2_270.bmp	s	816
2	19	female	16	11	d	DV_244_C2_042.bmp	d	870
2	19	female	16	12	d	DV_296_C2_235.bmp	d	778
2	19	female	16	13	d	DV_237_C2_297.bmp	d	1361
2	19	female	16	14	s	C2_260_DV_260.bmp	s	721
2	19	female	16	15	s	C2_256_DV_256.bmp	s	643
2	19	female	16	16	d	DV_217_C2_185.bmp	s	672
2	19	female	16	17	s	DV_267_C2_267.bmp	d	2412
2	19	female	16	18	s	C2_294_DV_294.bmp	d	906
2	19	female	16	19	s	C2_258_DV_258.bmp	s	541
2	19	female	16	20	s	DV_300_C2_300.bmp	s	766
2	19	female	16	21	s	C2_290_DV_290.bmp	s	902
2	19	female	16	22	s	DV_298_C2_298.bmp	s	721
2	19	female	16	23	s	DV_259_C2_259.bmp	s	555
2	19	female	16	24	d	DV_219_C2_135.bmp	s	627
2	19	female	16	25	d	DV_133_C2_139.bmp	s	449
2	19	female	16	26	s	DV_284_C2_284.bmp	s	389
2	19	female	16	27	d	DV_199_C2_125.bmp	s	517
2	19	female	16	28	d	DV_277_C2_110.bmp	s	143
2	19	female	16	29	d	DV_208_C2_183.bmp	s	104
2	19	female	16	30	s	C2_288_DV_288.bmp	s	443
2	19	female	16	31	d	DV_254_C2_287.bmp	s	192
2	19	female	16	32	s	C2_291_DV_291.bmp	s	72
2	19	female	16	33	s	C2_271_DV_271.bmp	s	468
2	19	female	16	34	d	DV_154_C2_042.bmp	s	88
2	19	female	16	35	s	C2_302_DV_302.bmp	s	211
2	19	female	16	36	d	DV_280_C2_003.bmp	s	105
2	19	female	16	37	d	DV_238_C2_218.bmp	s	140
2	19	female	16	38	d	DV_178_C2_099.bmp	s	165
2	19	female	16	39	d	DV_203_C2_277.bmp	s	37
2	19	female	16	40	d	C2_083_DV_108.bmp	s	82
2	19	female	17	1	d	C2_021_DV_087.bmp	s	518
2	19	female	17	2	d	C2_033_DV_180.bmp	s	64
2	19	female	17	3	s	C2_061_DV_061.bmp	s	68
2	19	female	17	4	d	C2_009_DV_033.bmp	s	48
2	19	female	17	5	d	C2_038_DV_081.bmp	s	4
2	19	female	17	6	s	C2_016_DV_016.bmp	s	515
2	19	female	17	7	s	DV_062_C2_062.bmp	d	13
2	19	female	17	8	s	C2_025_DV_025.bmp	s	475
2	19	female	17	9	d	DV_303_C2_217.bmp	s	103
2	19	female	17	10	d	DV_129_C2_092.bmp	s	114
2	19	female	17	11	s	C2_040_DV_040.bmp	s	212
2	19	female	17	12	s	C2_035_DV_035.bmp	s	218
2	19	female	17	13	s	C2_017_DV_017.bmp	s	184
2	19	female	17	14	s	C2_036_DV_036.bmp	s	1279
2	19	female	17	15	s	DV_046_C2_046.bmp	s	570
2	19	female	17	16	d	C2_051_DV_238.bmp	s	554
2	19	female	17	17	s	C2_028_DV_028.bmp	s	2323
2	19	female	17	18	s	C2_031_DV_031.bmp	s	660
2	19	female	17	19	d	C2_018_DV_019.bmp	s	665
2	19	female	17	20	s	C2_014_DV_014.bmp	s	581
2	19	female	17	21	d	C2_007_DV_097.bmp	s	324
2	19	female	17	22	d	C2_261_DV_201.bmp	d	1726
2	19	female	17	23	d	C2_039_DV_072.bmp	d	2224
2	19	female	17	24	s	C2_056_DV_056.bmp	s	774
2	19	female	17	25	s	C2_005_DV_005.bmp	s	510
2	19	female	17	26	d	C2_023_DV_304.bmp	s	633
2	19	female	17	27	s	DV_029_C2_029.bmp	s	1398
2	19	female	17	28	s	C2_043_DV_043.bmp	s	1397
2	19	female	17	29	d	C2_004_DV_293.bmp	s	2043
2	19	female	17	30	s	DV_015_C2_015.bmp	s	1457
2	19	female	17	31	s	C2_034_DV_034.bmp	s	1029
2	19	female	17	32	d	C2_037_DV_085.bmp	s	1843
2	19	female	17	33	d	C2_010_DV_303.bmp	s	664
2	19	female	17	34	d	C2_012_DV_205.bmp	s	828
2	19	female	17	35	s	C2_007_DV_007.bmp	s	769
2	19	female	17	36	d	C2_024_DV_030.bmp	s	1217
2	19	female	17	37	s	C2_054_DV_054.bmp	s	967
2	19	female	17	38	d	C2_011_DV_049.bmp	s	1143
2	19	female	17	39	d	C2_041_DV_044.bmp	s	641
2	19	female	17	40	d	C2_050_DV_215.bmp	s	1413
2	19	female	18	1	s	C2_066_DV_066.bmp	s	979
2	19	female	18	2	d	C2_076_DV_051.bmp	s	1426
2	19	female	18	3	s	C2_082_DV_082.bmp	s	3552
2	19	female	18	4	d	C2_174_DV_183.bmp	s	841
2	19	female	18	5	d	C2_002_DV_041.bmp	s	670
2	19	female	18	6	s	C2_102_DV_102.bmp	s	1978
2	19	female	18	7	s	C2_079_DV_079.bmp	s	914
2	19	female	18	8	d	C2_092_DV_227.bmp	s	652
2	19	female	18	9	s	C2_065_DV_065.bmp	s	632
2	19	female	18	10	s	DV_089_C2_089.bmp	s	926
2	19	female	18	11	s	C2_073_DV_073.bmp	s	5248
2	19	female	18	12	s	DV_104_C2_104.bmp	s	564
2	19	female	18	13	d	C2_057_DV_067.bmp	s	732
2	19	female	18	14	d	C2_055_DV_059.bmp	s	2158
2	19	female	18	15	d	C2_218_DV_109.bmp	s	702
2	19	female	18	16	s	DV_064_C2_064.bmp	s	889
2	19	female	18	17	s	C2_069_DV_069.bmp	s	548
2	19	female	18	18	d	C2_206_DV_077.bmp	s	405
2	19	female	18	19	s	DV_103_C2_103.bmp	s	315
2	19	female	18	20	s	C2_071_DV_071.bmp	s	573
2	19	female	18	21	d	C2_117_DV_219.bmp	s	437
2	19	female	18	22	d	C2_098_DV_024.bmp	s	362
2	19	female	18	23	s	C2_101_DV_101.bmp	s	554
2	19	female	18	24	d	C2_182_DV_184.bmp	s	419
2	19	female	18	25	s	C2_084_DV_084.bmp	s	497
2	19	female	18	26	d	C2_143_DV_254.bmp	s	595
2	19	female	18	27	d	C2_139_DV_120.bmp	s	546
2	19	female	18	28	s	DV_100_C2_100.bmp	d	2563
2	19	female	18	29	d	C2_211_DV_128.bmp	s	795
2	19	female	18	30	d	C2_091_DV_283.bmp	s	609
2	19	female	18	31	d	C2_171_DV_185.bmp	s	568
2	19	female	18	32	d	C2_123_DV_223.bmp	s	520
2	19	female	18	33	s	DV_086_C2_086.bmp	s	642
2	19	female	18	34	d	C2_095_DV_229.bmp	s	576
2	19	female	18	35	s	C2_078_DV_078.bmp	s	1096
2	19	female	18	36	d	C2_108_DV_282.bmp	s	1314
2	19	female	18	37	d	C2_070_DV_012.bmp	d	1716
2	19	female	18	38	s	C2_068_DV_068.bmp	s	814
2	19	female	18	39	s	C2_063_DV_063.bmp	s	868
2	19	female	18	40	s	C2_080_DV_080.bmp	s	800
2	19	female	19	1	d	C2_252_DV_125.bmp	d	1543
2	19	female	19	2	s	DV_127_C2_127.bmp	s	576
2	19	female	19	3	d	DV_024_C2_085.bmp	s	584
2	19	female	19	4	d	C2_239_DV_114.bmp	s	647
2	19	female	19	5	s	DV_141_C2_141.bmp	s	499
2	19	female	19	6	s	C2_146_DV_146.bmp	s	406
2	19	female	19	7	s	C2_113_DV_113.bmp	s	829
2	19	female	19	8	s	C2_134_DV_134.bmp	s	482
2	19	female	19	9	s	C2_119_DV_119.bmp	s	397
2	19	female	19	10	s	C2_142_DV_142.bmp	s	236
2	19	female	19	11	d	C2_003_DV_018.bmp	s	241
2	19	female	19	12	s	C2_140_DV_140.bmp	s	631
2	19	female	19	13	d	C2_240_DV_044.bmp	s	732
2	19	female	19	14	d	DV_037_C2_303.bmp	s	285
2	19	female	19	15	s	C2_131_DV_131.bmp	s	217
2	19	female	19	16	s	C2_105_DV_105.bmp	s	223
2	19	female	19	17	s	C2_152_DV_152.bmp	s	317
2	19	female	19	18	s	DV_118_C2_118.bmp	s	831
2	19	female	19	19	s	C2_115_DV_115.bmp	s	244
2	19	female	19	20	s	DV_137_C2_137.bmp	s	513
2	19	female	19	21	d	C2_261_DV_287.bmp	d	835
2	19	female	19	22	d	DV_012_C2_205.bmp	d	1529
2	19	female	19	23	d	DV_032_C2_153.bmp	s	1210
2	19	female	19	24	s	C2_144_DV_144.bmp	s	529
2	19	female	19	25	d	C2_289_DV_039.bmp	s	618
2	19	female	19	26	d	C2_242_DV_246.bmp	s	576
2	19	female	19	27	d	C2_223_DV_242.bmp	s	688
2	19	female	19	28	d	C2_246_DV_160.bmp	s	587
2	19	female	19	29	d	C2_304_DV_099.bmp	d	1947
2	19	female	19	30	d	C2_249_DV_083.bmp	s	611
2	19	female	19	31	s	C2_112_DV_112.bmp	s	505
2	19	female	19	32	s	C2_124_DV_124.bmp	s	475
2	19	female	19	33	d	C2_266_DV_227.bmp	s	543
2	19	female	19	34	d	DV_020_C2_090.bmp	s	864
2	19	female	19	35	d	DV_013_C2_235.bmp	s	684
2	19	female	19	36	s	C2_116_DV_116.bmp	s	720
2	19	female	19	37	s	DV_111_C2_111.bmp	s	810
2	19	female	19	38	d	DV_009_C2_180.bmp	s	752
2	19	female	19	39	s	DV_147_C2_147.bmp	s	745
2	19	female	19	40	d	C2_232_DV_048.bmp	s	6466
2	19	female	20	1	s	C2_181_Dv_181.bmp	d	1054
2	19	female	20	2	s	C2_158_DV_158.bmp	s	450
2	19	female	20	3	s	DV_161_C2_161.bmp	s	295
2	19	female	20	4	s	C2_155_DV_155.bmp	s	466
2	19	female	20	5	s	C2_194_DV_194.bmp	s	558
2	19	female	20	6	d	DV_039_C2_296.bmp	s	574
2	19	female	20	7	s	C2_226_DV_226.bmp	s	638
2	19	female	20	8	d	DV_120_C2_133.bmp	s	500
2	19	female	20	9	s	DV_167_C2_167.bmp	s	470
2	19	female	20	10	d	DV_132_C2_210.bmp	s	578
2	19	female	20	11	d	DV_053_C2_208.bmp	s	482
2	19	female	20	12	s	C2_157_DV_157.bmp	s	597
2	19	female	20	13	d	DV_109_C2_268.bmp	s	580
2	19	female	20	14	s	DV_222_C2_222.bmp	s	995
2	19	female	20	15	d	DV_091_C2_211.bmp	s	1345
2	19	female	20	16	s	DV_166_C2_166.bmp	s	777
2	19	female	20	17	d	DV_130_C2_253.bmp	s	593
2	19	female	20	18	d	DV_081_C2_282.bmp	s	1376
2	19	female	20	19	d	DV_108_C2_038.bmp	s	728
2	19	female	20	20	s	C2_207_DV_207.bmp	s	849
2	19	female	20	21	d	DV_126_C2_076.bmp	s	582
2	19	female	20	22	d	DV_094_C2_022.bmp	s	549
2	19	female	20	23	d	DV_074_C2_075.bmp	s	694
2	19	female	20	24	s	DV_231_C2_231.bmp	s	601
2	19	female	20	25	s	DV_204_C2_204.bmp	s	663
2	19	female	20	26	s	C2_243_DV_243.bmp	s	547
2	19	female	20	27	d	DV_088_C2_295.bmp	s	636
2	19	female	20	28	s	C2_247_DV_247.bmp	s	489
2	19	female	20	29	d	DV_160_C2_154.bmp	s	605
2	19	female	20	30	d	DV_114_C2_126.bmp	s	523
2	19	female	20	31	s	DV_248_C2_248.bmp	s	1245
2	19	female	20	32	d	DV_048_C2_175.bmp	s	1290
2	19	female	20	33	s	DV_200_C2_200.bmp	s	917
2	19	female	20	34	d	DV_129_C2_199.bmp	s	1096
2	19	female	20	35	s	DV_190_C2_190.bmp	s	890
2	19	female	20	36	d	DV_052_C2_264.bmp	s	702
2	19	female	20	37	s	C2_172_DV_172.bmp	s	784
2	19	female	20	38	d	DV_178_C2_060.bmp	s	616
2	19	female	20	39	d	DV_045_C2_027.bmp	s	478
2	19	female	20	40	s	DV_214_C2_214.bmp	s	586
2	19	female	21	1	s	C2_290_DV_290.bmp	s	3466
2	19	female	21	2	d	DV_219_C2_135.bmp	s	11069
2	19	female	21	3	s	DV_286_C2_286.bmp	s	5545
2	19	female	21	4	s	C2_288_DV_288.bmp	s	882
2	19	female	21	5	d	DV_254_C2_287.bmp	s	821
2	19	female	21	6	d	DV_237_C2_297.bmp	d	1403
2	19	female	21	7	d	DV_238_C2_218.bmp	s	682
2	19	female	21	8	s	DV_265_C2_265.bmp	s	821
2	19	female	21	9	d	DV_203_C2_277.bmp	s	571
2	19	female	21	10	s	C2_256_DV_256.bmp	s	779
2	19	female	21	11	d	C2_083_DV_108.bmp	s	1546
2	19	female	21	12	d	C2_008_DV_039.bmp	s	1915
2	19	female	21	13	s	C2_271_DV_271.bmp	s	5749
2	19	female	21	14	d	DV_199_C2_125.bmp	s	998
2	19	female	21	15	s	C2_302_DV_302.bmp	s	5420
2	19	female	21	16	d	DV_178_C2_099.bmp	s	1362
2	19	female	21	17	d	DV_244_C2_042.bmp	d	8257
2	19	female	21	18	s	DV_274_C2_274.bmp	s	1046
2	19	female	21	19	s	C2_258_DV_258.bmp	s	1139
2	19	female	21	20	d	DV_154_C2_042.bmp	d	1268
2	19	female	21	21	s	DV_259_C2_259.bmp	s	1696
2	19	female	21	22	d	DV_208_C2_183.bmp	s	243
2	19	female	21	23	d	DV_133_C2_139.bmp	s	24
2	19	female	21	24	d	DV_170_C2_270.bmp	s	70
2	19	female	21	25	d	DV_132_C2_168.bmp	s	98
2	19	female	21	26	s	DV_267_C2_267.bmp	s	85
2	19	female	21	27	s	C2_257_DV_257.bmp	s	5288
2	19	female	21	28	d	DV_295_C2_216.bmp	s	819
2	19	female	21	29	s	C2_291_DV_291.bmp	s	577
2	19	female	21	30	d	DV_280_C2_003.bmp	d	993
2	19	female	21	31	s	C2_294_DV_294.bmp	s	641
2	19	female	21	32	s	C2_278_DV_278.bmp	s	462
2	19	female	21	33	s	DV_299_C2_299.bmp	s	274
2	19	female	21	34	d	DV_217_C2_185.bmp	s	254
2	19	female	21	35	d	DV_296_C2_235.bmp	s	243
2	19	female	21	36	s	C2_260_DV_260.bmp	s	1184
2	19	female	21	37	d	DV_277_C2_110.bmp	s	407
2	19	female	21	38	s	DV_300_C2_300.bmp	s	294
2	19	female	21	39	s	DV_284_C2_284.bmp	s	1152
2	19	female	21	40	s	DV_298_C2_298.bmp	s	425
2	19	female	22	1	s	C2_025_DV_025.bmp	s	415
2	19	female	22	2	d	C2_007_DV_097.bmp	s	365
2	19	female	22	3	d	DV_129_C2_092.bmp	s	1725
2	19	female	22	4	d	C2_024_DV_030.bmp	s	463
2	19	female	22	5	d	C2_004_DV_293.bmp	s	515
2	19	female	22	6	d	C2_018_DV_019.bmp	s	837
2	19	female	22	7	d	C2_038_DV_081.bmp	s	1050
2	19	female	22	8	d	C2_050_DV_215.bmp	s	799
2	19	female	22	9	s	C2_040_DV_040.bmp	s	710
2	19	female	22	10	d	DV_303_C2_217.bmp	s	656
2	19	female	22	11	s	DV_046_C2_046.bmp	s	485
2	19	female	22	12	d	C2_261_DV_201.bmp	s	457
2	19	female	22	13	s	C2_043_DV_043.bmp	s	413
2	19	female	22	14	s	C2_056_DV_056.bmp	s	523
2	19	female	22	15	s	C2_016_DV_016.bmp	s	517
2	19	female	22	16	s	C2_005_DV_005.bmp	s	687
2	19	female	22	17	d	C2_012_DV_205.bmp	s	635
2	19	female	22	18	s	C2_007_DV_007.bmp	s	320
2	19	female	22	19	d	C2_051_DV_238.bmp	s	578
2	19	female	22	20	d	C2_041_DV_044.bmp	s	7297
2	19	female	22	21	s	DV_062_C2_062.bmp	s	1011
2	19	female	22	22	s	C2_034_DV_034.bmp	s	553
2	19	female	22	23	d	C2_011_DV_049.bmp	s	2730
2	19	female	22	24	s	DV_029_C2_029.bmp	s	1355
2	19	female	22	25	d	C2_033_DV_180.bmp	s	620
2	19	female	22	26	s	C2_028_DV_028.bmp	s	4754
2	19	female	22	27	s	C2_014_DV_014.bmp	s	930
2	19	female	22	28	d	C2_009_DV_033.bmp	s	5908
2	19	female	22	29	s	C2_035_DV_035.bmp	s	1022
2	19	female	22	30	d	C2_021_DV_087.bmp	s	2572
2	19	female	22	31	s	C2_054_DV_054.bmp	s	69394
2	19	female	22	32	s	C2_036_DV_036.bmp	s	2257
2	19	female	22	33	s	C2_017_DV_017.bmp	s	518
2	19	female	22	34	d	C2_010_DV_303.bmp	s	456
2	19	female	22	35	s	C2_031_DV_031.bmp	s	308
2	19	female	22	36	d	C2_023_DV_304.bmp	s	479
2	19	female	22	37	s	C2_061_DV_061.bmp	s	658
2	19	female	22	38	s	DV_015_C2_015.bmp	s	471
2	19	female	22	39	d	C2_037_DV_085.bmp	s	651
2	19	female	22	40	d	C2_039_DV_072.bmp	d	15136
2	19	female	23	1	d	C2_092_DV_227.bmp	s	1009
2	19	female	23	2	d	C2_117_DV_219.bmp	s	1168
2	19	female	23	3	d	C2_206_DV_077.bmp	s	33063
2	19	female	23	4	d	C2_139_DV_120.bmp	s	795
2	19	female	23	5	d	C2_091_DV_283.bmp	s	394
2	19	female	23	6	s	C2_102_DV_102.bmp	s	329
2	19	female	23	7	d	C2_143_DV_254.bmp	s	346
2	19	female	23	8	s	C2_071_DV_071.bmp	s	427
2	19	female	23	9	d	C2_174_DV_183.bmp	s	593
2	19	female	23	10	d	C2_076_DV_051.bmp	s	12799
2	19	female	23	11	s	C2_079_DV_079.bmp	s	910
2	19	female	23	12	d	C2_055_DV_059.bmp	d	2617
2	19	female	23	13	s	C2_065_DV_065.bmp	s	247
2	19	female	23	14	d	C2_002_DV_041.bmp	s	83
2	19	female	23	15	d	C2_171_DV_185.bmp	s	175
2	19	female	23	16	s	C2_084_DV_084.bmp	s	343
2	19	female	23	17	d	C2_070_DV_012.bmp	s	240
2	19	female	23	18	s	DV_104_C2_104.bmp	s	269
2	19	female	23	19	d	C2_211_DV_128.bmp	s	497
2	19	female	23	20	d	C2_108_DV_282.bmp	s	548
2	19	female	23	21	s	DV_086_C2_086.bmp	s	645
2	19	female	23	22	s	C2_073_DV_073.bmp	s	545
2	19	female	23	23	s	DV_100_C2_100.bmp	s	538
2	19	female	23	24	d	C2_218_DV_109.bmp	s	331
2	19	female	23	25	s	C2_080_DV_080.bmp	s	237
2	19	female	23	26	s	C2_078_DV_078.bmp	s	378
2	19	female	23	27	d	C2_123_DV_223.bmp	s	233
2	19	female	23	28	d	C2_057_DV_067.bmp	s	271
2	19	female	23	29	s	C2_068_DV_068.bmp	s	99
2	19	female	23	30	s	DV_103_C2_103.bmp	s	389
2	19	female	23	31	s	DV_089_C2_089.bmp	s	213
2	19	female	23	32	s	C2_066_DV_066.bmp	s	387
2	19	female	23	33	d	C2_095_DV_229.bmp	s	618
2	19	female	23	34	s	DV_064_C2_064.bmp	s	751
2	19	female	23	35	s	C2_063_DV_063.bmp	s	608
2	19	female	23	36	s	C2_082_DV_082.bmp	s	2278
2	19	female	23	37	d	C2_098_DV_024.bmp	s	474
2	19	female	23	38	s	C2_101_DV_101.bmp	s	598
2	19	female	23	39	s	C2_069_DV_069.bmp	s	1172
2	19	female	23	40	d	C2_182_DV_184.bmp	s	1052
2	19	female	24	1	d	DV_020_C2_090.bmp	s	761
2	19	female	24	2	d	C2_240_DV_044.bmp	s	52520
2	19	female	24	3	s	DV_118_C2_118.bmp	s	1850
2	19	female	24	4	d	C2_242_DV_246.bmp	s	1127
2	19	female	24	5	d	C2_261_DV_287.bmp	s	1289
2	19	female	24	6	d	C2_246_DV_160.bmp	s	1084
2	19	female	24	7	s	C2_134_DV_134.bmp	s	848
2	19	female	24	8	s	C2_112_DV_112.bmp	s	11852
2	19	female	24	9	d	DV_009_C2_180.bmp	s	864
2	19	female	24	10	s	DV_127_C2_127.bmp	s	524
2	19	female	24	11	s	C2_140_DV_140.bmp	s	206
2	19	female	24	12	d	C2_289_DV_039.bmp	s	261
2	19	female	24	13	s	C2_119_DV_119.bmp	s	209
2	19	female	24	14	s	DV_147_C2_147.bmp	s	287
2	19	female	24	15	s	C2_115_DV_115.bmp	s	147
2	19	female	24	16	d	C2_304_DV_099.bmp	s	147
2	19	female	24	17	d	DV_024_C2_085.bmp	s	76
2	19	female	24	18	d	DV_012_C2_205.bmp	s	64
2	19	female	24	19	s	DV_111_C2_111.bmp	s	1276
2	19	female	24	20	s	DV_141_C2_141.bmp	s	312
2	19	female	24	21	s	C2_116_DV_116.bmp	s	106
2	19	female	24	22	d	DV_032_C2_153.bmp	s	45
2	19	female	24	23	s	C2_131_DV_131.bmp	s	633
2	19	female	24	24	d	C2_223_DV_242.bmp	s	375
2	19	female	24	25	s	C2_105_DV_105.bmp	s	295
2	19	female	24	26	d	C2_266_DV_227.bmp	s	713
2	19	female	24	27	s	C2_152_DV_152.bmp	s	259
2	19	female	24	28	s	C2_146_DV_146.bmp	s	328
2	19	female	24	29	d	C2_249_DV_083.bmp	s	257
2	19	female	24	30	s	C2_113_DV_113.bmp	s	206
2	19	female	24	31	s	C2_124_DV_124.bmp	s	237
2	19	female	24	32	d	C2_252_DV_125.bmp	s	250
2	19	female	24	33	s	C2_144_DV_144.bmp	s	247
2	19	female	24	34	d	C2_003_DV_018.bmp	s	235
2	19	female	24	35	d	C2_239_DV_114.bmp	s	257
2	19	female	24	36	d	DV_037_C2_303.bmp	s	237
2	19	female	24	37	s	C2_142_DV_142.bmp	s	155
2	19	female	24	38	d	DV_013_C2_235.bmp	s	243
2	19	female	24	39	d	C2_232_DV_048.bmp	s	345
2	19	female	24	40	s	DV_137_C2_137.bmp	s	337
2	19	female	25	1	d	DV_109_C2_268.bmp	s	555
2	19	female	25	2	d	DV_108_C2_038.bmp	s	122
2	19	female	25	3	d	DV_053_C2_208.bmp	s	1212
2	19	female	25	4	s	C2_243_DV_243.bmp	s	210
2	19	female	25	5	d	DV_081_C2_282.bmp	s	176
2	19	female	25	6	s	DV_231_C2_231.bmp	s	104
2	19	female	25	7	s	DV_204_C2_204.bmp	s	235
2	19	female	25	8	s	C2_226_DV_226.bmp	s	432
2	19	female	25	9	s	C2_247_DV_247.bmp	s	294
2	19	female	25	10	d	DV_091_C2_211.bmp	s	209
2	19	female	25	11	s	C2_157_DV_157.bmp	s	312
2	19	female	25	12	s	C2_181_Dv_181.bmp	s	274
2	19	female	25	13	s	C2_172_DV_172.bmp	s	334
2	19	female	25	14	d	DV_074_C2_075.bmp	s	983
2	19	female	25	15	d	DV_126_C2_076.bmp	s	550
2	19	female	25	16	d	DV_114_C2_126.bmp	s	1407
2	19	female	25	17	d	DV_120_C2_133.bmp	s	526
2	19	female	25	18	d	DV_132_C2_210.bmp	s	3840
2	19	female	25	19	s	DV_166_C2_166.bmp	s	573
2	19	female	25	20	s	DV_248_C2_248.bmp	s	237
2	19	female	25	21	s	DV_167_C2_167.bmp	s	738
2	19	female	25	22	s	DV_222_C2_222.bmp	s	860
2	19	female	25	23	s	DV_214_C2_214.bmp	s	472
2	19	female	25	24	d	DV_160_C2_154.bmp	s	724
2	19	female	25	25	s	C2_194_DV_194.bmp	s	678
2	19	female	25	26	d	DV_039_C2_296.bmp	s	1058
2	19	female	25	27	s	DV_161_C2_161.bmp	s	566
2	19	female	25	28	s	C2_155_DV_155.bmp	s	566
2	19	female	25	29	d	DV_178_C2_060.bmp	s	661
2	19	female	25	30	s	C2_207_DV_207.bmp	s	441
2	19	female	25	31	s	C2_158_DV_158.bmp	s	471
2	19	female	25	32	d	DV_094_C2_022.bmp	s	315
2	19	female	25	33	s	DV_190_C2_190.bmp	s	237
2	19	female	25	34	d	DV_088_C2_295.bmp	s	170
2	19	female	25	35	d	DV_052_C2_264.bmp	s	1298
2	19	female	25	36	s	DV_200_C2_200.bmp	s	469
2	19	female	25	37	d	DV_130_C2_253.bmp	s	273
2	19	female	25	38	d	DV_129_C2_199.bmp	s	261
2	19	female	25	39	d	DV_045_C2_027.bmp	s	185
[truncated: 23,001 more rows]

## Sheet: Experiment 2
RoomNumber	Subject	Age	Sex	Block	Trial	CorrectAnswer	Lineup	Response	RTs
SG_MatchingHamood_14_V1_1	1	19	female	1	1	d	C2_037_DV_085.bmp	d	2730
SG_MatchingHamood_14_V1_1	1	19	female	1	2	s	DV_029_C2_029.bmp	s	2026
SG_MatchingHamood_14_V1_1	1	19	female	1	3	s	DV_046_C2_046.bmp	s	2533
SG_MatchingHamood_14_V1_1	1	19	female	1	4	d	C2_041_DV_044.bmp	d	2341
SG_MatchingHamood_14_V1_1	1	19	female	1	5	s	C2_007_DV_007.bmp	s	7115
SG_MatchingHamood_14_V1_1	1	19	female	1	6	s	DV_015_C2_015.bmp	s	2996
SG_MatchingHamood_14_V1_1	1	19	female	1	7	s	C2_017_DV_017.bmp	d	1570
SG_MatchingHamood_14_V1_1	1	19	female	1	8	d	C2_023_DV_304.bmp	d	1359
SG_MatchingHamood_14_V1_1	1	19	female	1	9	s	C2_043_DV_043.bmp	s	2661
SG_MatchingHamood_14_V1_1	1	19	female	1	10	d	C2_039_DV_072.bmp	d	6960
SG_MatchingHamood_14_V1_1	1	19	female	1	11	d	C2_011_DV_049.bmp	d	2246
SG_MatchingHamood_14_V1_1	1	19	female	1	12	d	C2_051_DV_238.bmp	d	1600
SG_MatchingHamood_14_V1_1	1	19	female	1	13	d	C2_261_DV_201.bmp	d	4509
SG_MatchingHamood_14_V1_1	1	19	female	1	14	d	DV_129_C2_092.bmp	d	1414
SG_MatchingHamood_14_V1_1	1	19	female	1	15	s	DV_062_C2_062.bmp	d	3210
SG_MatchingHamood_14_V1_1	1	19	female	1	16	d	C2_021_DV_087.bmp	s	6638
SG_MatchingHamood_14_V1_1	1	19	female	1	17	s	C2_036_DV_036.bmp	d	1283
SG_MatchingHamood_14_V1_1	1	19	female	1	18	d	C2_050_DV_215.bmp	d	2589
SG_MatchingHamood_14_V1_1	1	19	female	1	19	s	C2_054_DV_054.bmp	s	7378
SG_MatchingHamood_14_V1_1	1	19	female	1	20	s	C2_040_DV_040.bmp	s	5497
SG_MatchingHamood_14_V1_1	1	19	female	1	21	d	C2_018_DV_019.bmp	d	2105
SG_MatchingHamood_14_V1_1	1	19	female	1	22	s	C2_016_DV_016.bmp	s	2220
SG_MatchingHamood_14_V1_1	1	19	female	1	23	s	C2_031_DV_031.bmp	s	2824
SG_MatchingHamood_14_V1_1	1	19	female	1	24	d	C2_038_DV_081.bmp	d	2340
SG_MatchingHamood_14_V1_1	1	19	female	1	25	d	C2_024_DV_030.bmp	d	10474
SG_MatchingHamood_14_V1_1	1	19	female	1	26	d	C2_012_DV_205.bmp	d	1091
SG_MatchingHamood_14_V1_1	1	19	female	1	27	s	C2_035_DV_035.bmp	s	1292
SG_MatchingHamood_14_V1_1	1	19	female	1	28	s	C2_005_DV_005.bmp	d	1109
SG_MatchingHamood_14_V1_1	1	19	female	1	29	d	C2_010_DV_303.bmp	d	1717
SG_MatchingHamood_14_V1_1	1	19	female	1	30	s	C2_028_DV_028.bmp	s	2198
SG_MatchingHamood_14_V1_1	1	19	female	1	31	d	C2_009_DV_033.bmp	d	1579
SG_MatchingHamood_14_V1_1	1	19	female	1	32	d	DV_303_C2_217.bmp	d	1073
SG_MatchingHamood_14_V1_1	1	19	female	1	33	d	C2_033_DV_180.bmp	d	1523
SG_MatchingHamood_14_V1_1	1	19	female	1	34	s	C2_056_DV_056.bmp	s	1044
SG_MatchingHamood_14_V1_1	1	19	female	1	35	d	C2_004_DV_293.bmp	d	1782
SG_MatchingHamood_14_V1_1	1	19	female	1	36	s	C2_014_DV_014.bmp	s	3300
SG_MatchingHamood_14_V1_1	1	19	female	1	37	s	C2_025_DV_025.bmp	s	2189
SG_MatchingHamood_14_V1_1	1	19	female	1	38	s	C2_061_DV_061.bmp	s	1089
SG_MatchingHamood_14_V1_1	1	19	female	1	39	s	C2_034_DV_034.bmp	d	931
SG_MatchingHamood_14_V1_1	1	19	female	1	40	d	C2_007_DV_097.bmp	d	7451
SG_MatchingHamood_14_V1_1	1	19	female	2	1	d	C2_171_DV_185.bmp	d	8646
SG_MatchingHamood_14_V1_1	1	19	female	2	2	s	C2_073_DV_073.bmp	s	2394
SG_MatchingHamood_14_V1_1	1	19	female	2	3	s	C2_063_DV_063.bmp	s	1207
SG_MatchingHamood_14_V1_1	1	19	female	2	4	s	DV_100_C2_100.bmp	s	1499
SG_MatchingHamood_14_V1_1	1	19	female	2	5	s	DV_086_C2_086.bmp	s	2477
SG_MatchingHamood_14_V1_1	1	19	female	2	6	d	C2_123_DV_223.bmp	d	1407
SG_MatchingHamood_14_V1_1	1	19	female	2	7	d	C2_182_DV_184.bmp	d	1107
SG_MatchingHamood_14_V1_1	1	19	female	2	8	s	DV_064_C2_064.bmp	s	1155
SG_MatchingHamood_14_V1_1	1	19	female	2	9	d	C2_206_DV_077.bmp	s	1251
SG_MatchingHamood_14_V1_1	1	19	female	2	10	d	C2_070_DV_012.bmp	d	1366
SG_MatchingHamood_14_V1_1	1	19	female	2	11	d	C2_092_DV_227.bmp	d	1124
SG_MatchingHamood_14_V1_1	1	19	female	2	12	s	DV_103_C2_103.bmp	s	1213
SG_MatchingHamood_14_V1_1	1	19	female	2	13	d	C2_057_DV_067.bmp	d	2281
SG_MatchingHamood_14_V1_1	1	19	female	2	14	s	DV_089_C2_089.bmp	s	2810
SG_MatchingHamood_14_V1_1	1	19	female	2	15	d	C2_055_DV_059.bmp	s	855
SG_MatchingHamood_14_V1_1	1	19	female	2	16	d	C2_091_DV_283.bmp	s	3026
SG_MatchingHamood_14_V1_1	1	19	female	2	17	d	C2_002_DV_041.bmp	d	2293
SG_MatchingHamood_14_V1_1	1	19	female	2	18	s	C2_078_DV_078.bmp	s	1053
SG_MatchingHamood_14_V1_1	1	19	female	2	19	s	C2_084_DV_084.bmp	s	985
SG_MatchingHamood_14_V1_1	1	19	female	2	20	s	C2_101_DV_101.bmp	s	3927
SG_MatchingHamood_14_V1_1	1	19	female	2	21	s	C2_065_DV_065.bmp	s	911
SG_MatchingHamood_14_V1_1	1	19	female	2	22	d	C2_211_DV_128.bmp	d	984
SG_MatchingHamood_14_V1_1	1	19	female	2	23	s	C2_102_DV_102.bmp	s	2117
SG_MatchingHamood_14_V1_1	1	19	female	2	24	s	C2_082_DV_082.bmp	s	1686
SG_MatchingHamood_14_V1_1	1	19	female	2	25	s	DV_104_C2_104.bmp	s	7424
SG_MatchingHamood_14_V1_1	1	19	female	2	26	d	C2_098_DV_024.bmp	d	4508
SG_MatchingHamood_14_V1_1	1	19	female	2	27	d	C2_108_DV_282.bmp	d	1781
SG_MatchingHamood_14_V1_1	1	19	female	2	28	s	C2_068_DV_068.bmp	s	1475
SG_MatchingHamood_14_V1_1	1	19	female	2	29	d	C2_139_DV_120.bmp	s	1837
SG_MatchingHamood_14_V1_1	1	19	female	2	30	s	C2_079_DV_079.bmp	s	3617
SG_MatchingHamood_14_V1_1	1	19	female	2	31	d	C2_174_DV_183.bmp	d	3333
SG_MatchingHamood_14_V1_1	1	19	female	2	32	s	C2_071_DV_071.bmp	s	910
SG_MatchingHamood_14_V1_1	1	19	female	2	33	s	C2_080_DV_080.bmp	s	1622
SG_MatchingHamood_14_V1_1	1	19	female	2	34	d	C2_117_DV_219.bmp	s	1483
SG_MatchingHamood_14_V1_1	1	19	female	2	35	d	C2_095_DV_229.bmp	d	1300
SG_MatchingHamood_14_V1_1	1	19	female	2	36	d	C2_143_DV_254.bmp	s	1335
SG_MatchingHamood_14_V1_1	1	19	female	2	37	s	C2_066_DV_066.bmp	s	1688
SG_MatchingHamood_14_V1_1	1	19	female	2	38	d	C2_218_DV_109.bmp	s	2170
SG_MatchingHamood_14_V1_1	1	19	female	2	39	d	C2_076_DV_051.bmp	d	2665
SG_MatchingHamood_14_V1_1	1	19	female	2	40	s	C2_069_DV_069.bmp	s	988
SG_MatchingHamood_14_V1_1	1	19	female	3	1	s	C2_112_DV_112.bmp	s	2786
SG_MatchingHamood_14_V1_1	1	19	female	3	2	s	DV_137_C2_137.bmp	s	5041
SG_MatchingHamood_14_V1_1	1	19	female	3	3	d	C2_246_DV_160.bmp	s	1501
SG_MatchingHamood_14_V1_1	1	19	female	3	4	d	C2_240_DV_044.bmp	s	966
SG_MatchingHamood_14_V1_1	1	19	female	3	5	s	C2_134_DV_134.bmp	d	1149
SG_MatchingHamood_14_V1_1	1	19	female	3	6	s	DV_127_C2_127.bmp	s	923
SG_MatchingHamood_14_V1_1	1	19	female	3	7	d	DV_009_C2_180.bmp	d	7372
SG_MatchingHamood_14_V1_1	1	19	female	3	8	s	C2_144_DV_144.bmp	d	6571
SG_MatchingHamood_14_V1_1	1	19	female	3	9	d	C2_239_DV_114.bmp	d	1634
SG_MatchingHamood_14_V1_1	1	19	female	3	10	s	C2_124_DV_124.bmp	s	710
SG_MatchingHamood_14_V1_1	1	19	female	3	11	d	DV_037_C2_303.bmp	d	1286
SG_MatchingHamood_14_V1_1	1	19	female	3	12	d	DV_020_C2_090.bmp	d	2552
SG_MatchingHamood_14_V1_1	1	19	female	3	13	s	DV_141_C2_141.bmp	s	1328
SG_MatchingHamood_14_V1_1	1	19	female	3	14	s	C2_119_DV_119.bmp	d	1336
SG_MatchingHamood_14_V1_1	1	19	female	3	15	d	C2_249_DV_083.bmp	s	1232
SG_MatchingHamood_14_V1_1	1	19	female	3	16	s	DV_147_C2_147.bmp	s	1078
SG_MatchingHamood_14_V1_1	1	19	female	3	17	d	C2_003_DV_018.bmp	d	872
SG_MatchingHamood_14_V1_1	1	19	female	3	18	d	C2_242_DV_246.bmp	d	2803
SG_MatchingHamood_14_V1_1	1	19	female	3	19	d	C2_252_DV_125.bmp	s	4336
SG_MatchingHamood_14_V1_1	1	19	female	3	20	s	C2_113_DV_113.bmp	s	1945
SG_MatchingHamood_14_V1_1	1	19	female	3	21	d	C2_232_DV_048.bmp	d	3353
SG_MatchingHamood_14_V1_1	1	19	female	3	22	d	C2_289_DV_039.bmp	d	1009
SG_MatchingHamood_14_V1_1	1	19	female	3	23	d	C2_266_DV_227.bmp	d	774
SG_MatchingHamood_14_V1_1	1	19	female	3	24	s	C2_115_DV_115.bmp	s	732
SG_MatchingHamood_14_V1_1	1	19	female	3	25	d	DV_032_C2_153.bmp	s	852
SG_MatchingHamood_14_V1_1	1	19	female	3	26	d	DV_013_C2_235.bmp	d	736
SG_MatchingHamood_14_V1_1	1	19	female	3	27	d	DV_012_C2_205.bmp	d	1016
SG_MatchingHamood_14_V1_1	1	19	female	3	28	s	C2_140_DV_140.bmp	d	1332
SG_MatchingHamood_14_V1_1	1	19	female	3	29	d	DV_024_C2_085.bmp	s	2924
SG_MatchingHamood_14_V1_1	1	19	female	3	30	d	C2_304_DV_099.bmp	s	981
SG_MatchingHamood_14_V1_1	1	19	female	3	31	s	DV_111_C2_111.bmp	d	714
SG_MatchingHamood_14_V1_1	1	19	female	3	32	s	DV_118_C2_118.bmp	s	1132
SG_MatchingHamood_14_V1_1	1	19	female	3	33	s	C2_105_DV_105.bmp	s	843
SG_MatchingHamood_14_V1_1	1	19	female	3	34	d	C2_223_DV_242.bmp	s	1439
SG_MatchingHamood_14_V1_1	1	19	female	3	35	s	C2_146_DV_146.bmp	s	4579
SG_MatchingHamood_14_V1_1	1	19	female	3	36	s	C2_131_DV_131.bmp	d	1217
SG_MatchingHamood_14_V1_1	1	19	female	3	37	s	C2_152_DV_152.bmp	d	3599
SG_MatchingHamood_14_V1_1	1	19	female	3	38	s	C2_116_DV_116.bmp	s	1860
SG_MatchingHamood_14_V1_1	1	19	female	3	39	d	C2_261_DV_287.bmp	d	2535
SG_MatchingHamood_14_V1_1	1	19	female	3	40	s	C2_142_DV_142.bmp	s	1895
SG_MatchingHamood_14_V1_1	1	19	female	4	1	s	C2_181_Dv_181.bmp	s	1897
SG_MatchingHamood_14_V1_1	1	19	female	4	2	s	DV_248_C2_248.bmp	s	2235
SG_MatchingHamood_14_V1_1	1	19	female	4	3	s	C2_158_DV_158.bmp	s	1655
SG_MatchingHamood_14_V1_1	1	19	female	4	4	d	DV_160_C2_154.bmp	s	1498
SG_MatchingHamood_14_V1_1	1	19	female	4	5	d	DV_048_C2_175.bmp	d	1644
SG_MatchingHamood_14_V1_1	1	19	female	4	6	d	DV_094_C2_022.bmp	d	1710
SG_MatchingHamood_14_V1_1	1	19	female	4	7	s	DV_166_C2_166.bmp	d	1503
SG_MatchingHamood_14_V1_1	1	19	female	4	8	s	DV_167_C2_167.bmp	s	3617
SG_MatchingHamood_14_V1_1	1	19	female	4	9	d	DV_045_C2_027.bmp	d	1294
SG_MatchingHamood_14_V1_1	1	19	female	4	10	d	DV_114_C2_126.bmp	d	2303
SG_MatchingHamood_14_V1_1	1	19	female	4	11	d	DV_129_C2_199.bmp	s	1233
SG_MatchingHamood_14_V1_1	1	19	female	4	12	s	DV_161_C2_161.bmp	s	1853
SG_MatchingHamood_14_V1_1	1	19	female	4	13	s	DV_204_C2_204.bmp	s	1576
SG_MatchingHamood_14_V1_1	1	19	female	4	14	s	C2_157_DV_157.bmp	s	4110
SG_MatchingHamood_14_V1_1	1	19	female	4	15	s	C2_247_DV_247.bmp	s	3223
SG_MatchingHamood_14_V1_1	1	19	female	4	16	d	DV_091_C2_211.bmp	d	2404
SG_MatchingHamood_14_V1_1	1	19	female	4	17	s	DV_190_C2_190.bmp	s	1912
SG_MatchingHamood_14_V1_1	1	19	female	4	18	s	C2_172_DV_172.bmp	s	1210
SG_MatchingHamood_14_V1_1	1	19	female	4	19	d	DV_108_C2_038.bmp	s	1095
SG_MatchingHamood_14_V1_1	1	19	female	4	20	d	DV_039_C2_296.bmp	s	1416
SG_MatchingHamood_14_V1_1	1	19	female	4	21	d	DV_053_C2_208.bmp	d	853
SG_MatchingHamood_14_V1_1	1	19	female	4	22	d	DV_132_C2_210.bmp	s	3184
SG_MatchingHamood_14_V1_1	1	19	female	4	23	s	DV_200_C2_200.bmp	s	1198
SG_MatchingHamood_14_V1_1	1	19	female	4	24	d	DV_088_C2_295.bmp	d	724
SG_MatchingHamood_14_V1_1	1	19	female	4	25	d	DV_081_C2_282.bmp	s	949
SG_MatchingHamood_14_V1_1	1	19	female	4	26	d	DV_130_C2_253.bmp	s	1132
SG_MatchingHamood_14_V1_1	1	19	female	4	27	s	DV_222_C2_222.bmp	d	1300
SG_MatchingHamood_14_V1_1	1	19	female	4	28	d	DV_126_C2_076.bmp	d	2286
SG_MatchingHamood_14_V1_1	1	19	female	4	29	d	DV_074_C2_075.bmp	s	1632
SG_MatchingHamood_14_V1_1	1	19	female	4	30	s	C2_194_DV_194.bmp	s	1636
SG_MatchingHamood_14_V1_1	1	19	female	4	31	d	DV_052_C2_264.bmp	s	1240
SG_MatchingHamood_14_V1_1	1	19	female	4	32	s	C2_243_DV_243.bmp	s	1524
SG_MatchingHamood_14_V1_1	1	19	female	4	33	d	DV_120_C2_133.bmp	s	940
SG_MatchingHamood_14_V1_1	1	19	female	4	34	d	DV_178_C2_060.bmp	s	1293
SG_MatchingHamood_14_V1_1	1	19	female	4	35	s	DV_214_C2_214.bmp	s	1071
SG_MatchingHamood_14_V1_1	1	19	female	4	36	s	C2_207_DV_207.bmp	s	1192
SG_MatchingHamood_14_V1_1	1	19	female	4	37	d	DV_109_C2_268.bmp	d	966
SG_MatchingHamood_14_V1_1	1	19	female	4	38	s	C2_155_DV_155.bmp	s	1156
SG_MatchingHamood_14_V1_1	1	19	female	4	39	s	DV_231_C2_231.bmp	s	917
SG_MatchingHamood_14_V1_1	1	19	female	4	40	s	C2_226_DV_226.bmp	s	1053
SG_MatchingHamood_14_V1_1	1	19	female	5	1	d	DV_254_C2_287.bmp	s	1817
SG_MatchingHamood_14_V1_1	1	19	female	5	2	d	DV_132_C2_168.bmp	s	1453
SG_MatchingHamood_14_V1_1	1	19	female	5	3	d	DV_219_C2_135.bmp	s	1289
SG_MatchingHamood_14_V1_1	1	19	female	5	4	s	DV_299_C2_299.bmp	s	2307
SG_MatchingHamood_14_V1_1	1	19	female	5	5	d	C2_083_DV_108.bmp	s	1797
SG_MatchingHamood_14_V1_1	1	19	female	5	6	d	DV_280_C2_003.bmp	s	2130
SG_MatchingHamood_14_V1_1	1	19	female	5	7	d	DV_199_C2_125.bmp	s	1314
SG_MatchingHamood_14_V1_1	1	19	female	5	8	s	C2_258_DV_258.bmp	s	1019
SG_MatchingHamood_14_V1_1	1	19	female	5	9	s	DV_259_C2_259.bmp	s	1048
SG_MatchingHamood_14_V1_1	1	19	female	5	10	s	DV_284_C2_284.bmp	s	1106
SG_MatchingHamood_14_V1_1	1	19	female	5	11	d	DV_208_C2_183.bmp	d	3180
SG_MatchingHamood_14_V1_1	1	19	female	5	12	s	C2_290_DV_290.bmp	s	1314
SG_MatchingHamood_14_V1_1	1	19	female	5	13	d	DV_154_C2_042.bmp	d	1236
SG_MatchingHamood_14_V1_1	1	19	female	5	14	s	C2_271_DV_271.bmp	s	2576
SG_MatchingHamood_14_V1_1	1	19	female	5	15	s	C2_291_DV_291.bmp	s	1541
SG_MatchingHamood_14_V1_1	1	19	female	5	16	d	DV_133_C2_139.bmp	d	4237
SG_MatchingHamood_14_V1_1	1	19	female	5	17	d	DV_203_C2_277.bmp	d	1281
SG_MatchingHamood_14_V1_1	1	19	female	5	18	s	DV_274_C2_274.bmp	s	2715
SG_MatchingHamood_14_V1_1	1	19	female	5	19	s	DV_300_C2_300.bmp	s	1724
SG_MatchingHamood_14_V1_1	1	19	female	5	20	d	DV_295_C2_216.bmp	d	1124
SG_MatchingHamood_14_V1_1	1	19	female	5	21	s	C2_260_DV_260.bmp	s	1092
SG_MatchingHamood_14_V1_1	1	19	female	5	22	s	C2_288_DV_288.bmp	d	9430
SG_MatchingHamood_14_V1_1	1	19	female	5	23	s	C2_278_DV_278.bmp	s	1282
SG_MatchingHamood_14_V1_1	1	19	female	5	24	d	DV_238_C2_218.bmp	d	835
SG_MatchingHamood_14_V1_1	1	19	female	5	25	d	DV_178_C2_099.bmp	d	2719
SG_MatchingHamood_14_V1_1	1	19	female	5	26	s	C2_302_DV_302.bmp	d	1897
SG_MatchingHamood_14_V1_1	1	19	female	5	27	s	DV_298_C2_298.bmp	d	2522
SG_MatchingHamood_14_V1_1	1	19	female	5	28	d	DV_296_C2_235.bmp	s	2715
SG_MatchingHamood_14_V1_1	1	19	female	5	29	s	C2_256_DV_256.bmp	s	1100
SG_MatchingHamood_14_V1_1	1	19	female	5	30	s	DV_286_C2_286.bmp	s	1069
SG_MatchingHamood_14_V1_1	1	19	female	5	31	d	C2_008_DV_039.bmp	s	1072
SG_MatchingHamood_14_V1_1	1	19	female	5	32	d	DV_244_C2_042.bmp	d	1794
SG_MatchingHamood_14_V1_1	1	19	female	5	33	s	DV_265_C2_265.bmp	d	1440
SG_MatchingHamood_14_V1_1	1	19	female	5	34	s	C2_294_DV_294.bmp	d	1628
SG_MatchingHamood_14_V1_1	1	19	female	5	35	s	C2_257_DV_257.bmp	s	3303
SG_MatchingHamood_14_V1_1	1	19	female	5	36	d	DV_237_C2_297.bmp	d	865
SG_MatchingHamood_14_V1_1	1	19	female	5	37	d	DV_217_C2_185.bmp	d	901
SG_MatchingHamood_14_V1_1	1	19	female	5	38	d	DV_170_C2_270.bmp	s	935
SG_MatchingHamood_14_V1_1	1	19	female	5	39	s	DV_267_C2_267.bmp	d	879
SG_MatchingHamood_14_V1_1	1	19	female	5	40	d	DV_277_C2_110.bmp	d	921
SG_MatchingHamood_14_V1_2	1	19	female	1	1	d	C2_011_DV_049.bmp	d	3131
SG_MatchingHamood_14_V1_2	1	19	female	1	2	s	C2_031_DV_031.bmp	s	4090
SG_MatchingHamood_14_V1_2	1	19	female	1	3	s	C2_014_DV_014.bmp	s	7748
SG_MatchingHamood_14_V1_2	1	19	female	1	4	d	C2_261_DV_201.bmp	s	1475
SG_MatchingHamood_14_V1_2	1	19	female	1	5	s	C2_043_DV_043.bmp	s	1101
SG_MatchingHamood_14_V1_2	1	19	female	1	6	d	C2_007_DV_097.bmp	d	950
SG_MatchingHamood_14_V1_2	1	19	female	1	7	s	C2_034_DV_034.bmp	d	6677
SG_MatchingHamood_14_V1_2	1	19	female	1	8	s	C2_040_DV_040.bmp	s	2902
SG_MatchingHamood_14_V1_2	1	19	female	1	9	d	C2_038_DV_081.bmp	d	3215
SG_MatchingHamood_14_V1_2	1	19	female	1	10	d	C2_023_DV_304.bmp	d	3164
SG_MatchingHamood_14_V1_2	1	19	female	1	11	d	C2_051_DV_238.bmp	d	1066
SG_MatchingHamood_14_V1_2	1	19	female	1	12	d	C2_050_DV_215.bmp	d	4596
SG_MatchingHamood_14_V1_2	1	19	female	1	13	s	DV_046_C2_046.bmp	s	1247
SG_MatchingHamood_14_V1_2	1	19	female	1	14	d	DV_129_C2_092.bmp	d	1051
SG_MatchingHamood_14_V1_2	1	19	female	1	15	s	C2_017_DV_017.bmp	s	1183
SG_MatchingHamood_14_V1_2	1	19	female	1	16	s	DV_062_C2_062.bmp	s	1229
SG_MatchingHamood_14_V1_2	1	19	female	1	17	d	C2_009_DV_033.bmp	d	2608
SG_MatchingHamood_14_V1_2	1	19	female	1	18	d	C2_039_DV_072.bmp	d	1621
SG_MatchingHamood_14_V1_2	1	19	female	1	19	s	C2_025_DV_025.bmp	d	1978
SG_MatchingHamood_14_V1_2	1	19	female	1	20	s	C2_005_DV_005.bmp	s	1999
SG_MatchingHamood_14_V1_2	1	19	female	1	21	s	C2_054_DV_054.bmp	d	2821
SG_MatchingHamood_14_V1_2	1	19	female	1	22	s	C2_036_DV_036.bmp	d	1362
SG_MatchingHamood_14_V1_2	1	19	female	1	23	s	DV_015_C2_015.bmp	s	1079
SG_MatchingHamood_14_V1_2	1	19	female	1	24	s	C2_061_DV_061.bmp	s	1000
SG_MatchingHamood_14_V1_2	1	19	female	1	25	s	C2_007_DV_007.bmp	s	1478
SG_MatchingHamood_14_V1_2	1	19	female	1	26	d	C2_041_DV_044.bmp	s	2079
SG_MatchingHamood_14_V1_2	1	19	female	1	27	d	C2_021_DV_087.bmp	s	2953
SG_MatchingHamood_14_V1_2	1	19	female	1	28	d	C2_018_DV_019.bmp	d	1823
SG_MatchingHamood_14_V1_2	1	19	female	1	29	s	C2_056_DV_056.bmp	s	741
SG_MatchingHamood_14_V1_2	1	19	female	1	30	d	C2_024_DV_030.bmp	d	4218
SG_MatchingHamood_14_V1_2	1	19	female	1	31	d	DV_303_C2_217.bmp	d	1767
SG_MatchingHamood_14_V1_2	1	19	female	1	32	d	C2_012_DV_205.bmp	s	1135
SG_MatchingHamood_14_V1_2	1	19	female	1	33	s	C2_028_DV_028.bmp	s	1655
SG_MatchingHamood_14_V1_2	1	19	female	1	34	d	C2_004_DV_293.bmp	d	945
SG_MatchingHamood_14_V1_2	1	19	female	1	35	d	C2_037_DV_085.bmp	d	1688
SG_MatchingHamood_14_V1_2	1	19	female	1	36	s	C2_035_DV_035.bmp	s	770
SG_MatchingHamood_14_V1_2	1	19	female	1	37	s	C2_016_DV_016.bmp	s	3871
SG_MatchingHamood_14_V1_2	1	19	female	1	38	d	C2_033_DV_180.bmp	d	3731
SG_MatchingHamood_14_V1_2	1	19	female	1	39	s	DV_029_C2_029.bmp	s	9770
SG_MatchingHamood_14_V1_2	1	19	female	1	40	d	C2_010_DV_303.bmp	s	5088
SG_MatchingHamood_14_V1_2	1	19	female	2	1	s	DV_089_C2_089.bmp	s	1151
SG_MatchingHamood_14_V1_2	1	19	female	2	2	d	C2_002_DV_041.bmp	d	1712
SG_MatchingHamood_14_V1_2	1	19	female	2	3	s	C2_063_DV_063.bmp	d	2975
SG_MatchingHamood_14_V1_2	1	19	female	2	4	s	C2_101_DV_101.bmp	s	1679
SG_MatchingHamood_14_V1_2	1	19	female	2	5	s	C2_084_DV_084.bmp	s	823
SG_MatchingHamood_14_V1_2	1	19	female	2	6	s	C2_068_DV_068.bmp	s	710
SG_MatchingHamood_14_V1_2	1	19	female	2	7	s	DV_103_C2_103.bmp	s	1364
SG_MatchingHamood_14_V1_2	1	19	female	2	8	d	C2_076_DV_051.bmp	d	1257
SG_MatchingHamood_14_V1_2	1	19	female	2	9	d	C2_174_DV_183.bmp	d	1207
SG_MatchingHamood_14_V1_2	1	19	female	2	10	s	DV_086_C2_086.bmp	d	979
SG_MatchingHamood_14_V1_2	1	19	female	2	11	d	C2_092_DV_227.bmp	d	2515
SG_MatchingHamood_14_V1_2	1	19	female	2	12	s	C2_082_DV_082.bmp	s	642
SG_MatchingHamood_14_V1_2	1	19	female	2	13	d	C2_218_DV_109.bmp	s	1062
SG_MatchingHamood_14_V1_2	1	19	female	2	14	d	C2_206_DV_077.bmp	s	1632
SG_MatchingHamood_14_V1_2	1	19	female	2	15	s	C2_073_DV_073.bmp	s	1332
SG_MatchingHamood_14_V1_2	1	19	female	2	16	d	C2_117_DV_219.bmp	s	1153
SG_MatchingHamood_14_V1_2	1	19	female	2	17	s	DV_064_C2_064.bmp	s	977
SG_MatchingHamood_14_V1_2	1	19	female	2	18	s	C2_078_DV_078.bmp	s	1528
SG_MatchingHamood_14_V1_2	1	19	female	2	19	s	C2_069_DV_069.bmp	s	935
SG_MatchingHamood_14_V1_2	1	19	female	2	20	d	C2_057_DV_067.bmp	s	800
SG_MatchingHamood_14_V1_2	1	19	female	2	21	d	C2_171_DV_185.bmp	s	828
SG_MatchingHamood_14_V1_2	1	19	female	2	22	s	C2_066_DV_066.bmp	s	825
SG_MatchingHamood_14_V1_2	1	19	female	2	23	d	C2_211_DV_128.bmp	s	1388
SG_MatchingHamood_14_V1_2	1	19	female	2	24	s	DV_100_C2_100.bmp	s	787
SG_MatchingHamood_14_V1_2	1	19	female	2	25	d	C2_091_DV_283.bmp	s	1727
SG_MatchingHamood_14_V1_2	1	19	female	2	26	s	DV_104_C2_104.bmp	s	1352
SG_MatchingHamood_14_V1_2	1	19	female	2	27	s	C2_102_DV_102.bmp	s	1352
SG_MatchingHamood_14_V1_2	1	19	female	2	28	d	C2_139_DV_120.bmp	d	1422
SG_MatchingHamood_14_V1_2	1	19	female	2	29	s	C2_080_DV_080.bmp	s	1331
SG_MatchingHamood_14_V1_2	1	19	female	2	30	s	C2_065_DV_065.bmp	s	728
SG_MatchingHamood_14_V1_2	1	19	female	2	31	s	C2_079_DV_079.bmp	s	1015
SG_MatchingHamood_14_V1_2	1	19	female	2	32	d	C2_108_DV_282.bmp	d	3277
SG_MatchingHamood_14_V1_2	1	19	female	2	33	d	C2_182_DV_184.bmp	s	2512
SG_MatchingHamood_14_V1_2	1	19	female	2	34	d	C2_143_DV_254.bmp	d	1369
SG_MatchingHamood_14_V1_2	1	19	female	2	35	d	C2_055_DV_059.bmp	d	2200
SG_MatchingHamood_14_V1_2	1	19	female	2	36	d	C2_123_DV_223.bmp	d	5477
SG_MatchingHamood_14_V1_2	1	19	female	2	37	d	C2_098_DV_024.bmp	s	2647
SG_MatchingHamood_14_V1_2	1	19	female	2	38	s	C2_071_DV_071.bmp	s	1274
SG_MatchingHamood_14_V1_2	1	19	female	2	39	d	C2_095_DV_229.bmp	s	1637
SG_MatchingHamood_14_V1_2	1	19	female	2	40	d	C2_070_DV_012.bmp	s	3335
SG_MatchingHamood_14_V1_2	1	19	female	3	1	s	C2_142_DV_142.bmp	s	2456
SG_MatchingHamood_14_V1_2	1	19	female	3	2	s	C2_105_DV_105.bmp	s	10978
SG_MatchingHamood_14_V1_2	1	19	female	3	3	s	C2_115_DV_115.bmp	s	2360
SG_MatchingHamood_14_V1_2	1	19	female	3	4	d	C2_242_DV_246.bmp	s	6438
SG_MatchingHamood_14_V1_2	1	19	female	3	5	d	C2_223_DV_242.bmp	s	2994
SG_MatchingHamood_14_V1_2	1	19	female	3	6	d	C2_246_DV_160.bmp	s	3753
SG_MatchingHamood_14_V1_2	1	19	female	3	7	s	DV_127_C2_127.bmp	s	1896
SG_MatchingHamood_14_V1_2	1	19	female	3	8	d	DV_020_C2_090.bmp	s	6544
SG_MatchingHamood_14_V1_2	1	19	female	3	9	s	DV_137_C2_137.bmp	s	2591
SG_MatchingHamood_14_V1_2	1	19	female	3	10	s	C2_144_DV_144.bmp	s	4715
SG_MatchingHamood_14_V1_2	1	19	female	3	11	s	C2_119_DV_119.bmp	s	3899
SG_MatchingHamood_14_V1_2	1	19	female	3	12	d	DV_012_C2_205.bmp	d	4062
SG_MatchingHamood_14_V1_2	1	19	female	3	13	d	C2_240_DV_044.bmp	s	1887
SG_MatchingHamood_14_V1_2	1	19	female	3	14	d	C2_266_DV_227.bmp	s	3064
SG_MatchingHamood_14_V1_2	1	19	female	3	15	d	C2_239_DV_114.bmp	s	8073
SG_MatchingHamood_14_V1_2	1	19	female	3	16	s	DV_118_C2_118.bmp	s	2494
SG_MatchingHamood_14_V1_2	1	19	female	3	17	s	C2_116_DV_116.bmp	s	1164
SG_MatchingHamood_14_V1_2	1	19	female	3	18	s	DV_111_C2_111.bmp	s	1651
SG_MatchingHamood_14_V1_2	1	19	female	3	19	s	C2_112_DV_112.bmp	s	4030
SG_MatchingHamood_14_V1_2	1	19	female	3	20	d	DV_032_C2_153.bmp	s	3945
SG_MatchingHamood_14_V1_2	1	19	female	3	21	d	C2_289_DV_039.bmp	d	1008
SG_MatchingHamood_14_V1_2	1	19	female	3	22	s	C2_140_DV_140.bmp	s	1086
SG_MatchingHamood_14_V1_2	1	19	female	3	23	d	C2_252_DV_125.bmp	s	1143
SG_MatchingHamood_14_V1_2	1	19	female	3	24	d	DV_009_C2_180.bmp	d	1855
SG_MatchingHamood_14_V1_2	1	19	female	3	25	s	C2_113_DV_113.bmp	s	7713
SG_MatchingHamood_14_V1_2	1	19	female	3	26	s	C2_134_DV_134.bmp	s	1258
SG_MatchingHamood_14_V1_2	1	19	female	3	27	d	C2_003_DV_018.bmp	s	918
SG_MatchingHamood_14_V1_2	1	19	female	3	28	s	C2_152_DV_152.bmp	s	781
SG_MatchingHamood_14_V1_2	1	19	female	3	29	s	DV_141_C2_141.bmp	s	1266
SG_MatchingHamood_14_V1_2	1	19	female	3	30	d	C2_304_DV_099.bmp	s	806
SG_MatchingHamood_14_V1_2	1	19	female	3	31	d	DV_013_C2_235.bmp	d	753
SG_MatchingHamood_14_V1_2	1	19	female	3	32	s	C2_146_DV_146.bmp	s	641
SG_MatchingHamood_14_V1_2	1	19	female	3	33	d	DV_024_C2_085.bmp	d	788
SG_MatchingHamood_14_V1_2	1	19	female	3	34	s	DV_147_C2_147.bmp	s	1108
SG_MatchingHamood_14_V1_2	1	19	female	3	35	s	C2_124_DV_124.bmp	s	924
SG_MatchingHamood_14_V1_2	1	19	female	3	36	d	C2_232_DV_048.bmp	s	1508
SG_MatchingHamood_14_V1_2	1	19	female	3	37	d	C2_261_DV_287.bmp	d	1397
SG_MatchingHamood_14_V1_2	1	19	female	3	38	s	C2_131_DV_131.bmp	s	1707
SG_MatchingHamood_14_V1_2	1	19	female	3	39	d	DV_037_C2_303.bmp	d	1068
SG_MatchingHamood_14_V1_2	1	19	female	3	40	d	C2_249_DV_083.bmp	d	1174
SG_MatchingHamood_14_V1_2	1	19	female	4	1	s	DV_248_C2_248.bmp	s	907
SG_MatchingHamood_14_V1_2	1	19	female	4	2	s	DV_214_C2_214.bmp	s	980
SG_MatchingHamood_14_V1_2	1	19	female	4	3	s	DV_231_C2_231.bmp	s	1282
SG_MatchingHamood_14_V1_2	1	19	female	4	4	d	DV_109_C2_268.bmp	d	1476
SG_MatchingHamood_14_V1_2	1	19	female	4	5	d	DV_114_C2_126.bmp	d	919
SG_MatchingHamood_14_V1_2	1	19	female	4	6	s	DV_167_C2_167.bmp	s	893
SG_MatchingHamood_14_V1_2	1	19	female	4	7	d	DV_160_C2_154.bmp	d	1257
SG_MatchingHamood_14_V1_2	1	19	female	4	8	d	DV_048_C2_175.bmp	s	788
SG_MatchingHamood_14_V1_2	1	19	female	4	9	d	DV_045_C2_027.bmp	d	1298
SG_MatchingHamood_14_V1_2	1	19	female	4	10	s	DV_204_C2_204.bmp	s	1802
SG_MatchingHamood_14_V1_2	1	19	female	4	11	d	DV_132_C2_210.bmp	d	1605
SG_MatchingHamood_14_V1_2	1	19	female	4	12	s	DV_222_C2_222.bmp	d	3075
SG_MatchingHamood_14_V1_2	1	19	female	4	13	s	DV_161_C2_161.bmp	s	2927
SG_MatchingHamood_14_V1_2	1	19	female	4	14	d	DV_120_C2_133.bmp	d	2271
SG_MatchingHamood_14_V1_2	1	19	female	4	15	s	C2_172_DV_172.bmp	d	1898
SG_MatchingHamood_14_V1_2	1	19	female	4	16	s	DV_200_C2_200.bmp	s	875
SG_MatchingHamood_14_V1_2	1	19	female	4	17	d	DV_130_C2_253.bmp	s	6532
SG_MatchingHamood_14_V1_2	1	19	female	4	18	d	DV_039_C2_296.bmp	s	8482
SG_MatchingHamood_14_V1_2	1	19	female	4	19	s	DV_190_C2_190.bmp	s	1070
SG_MatchingHamood_14_V1_2	1	19	female	4	20	s	C2_157_DV_157.bmp	s	15343
SG_MatchingHamood_14_V1_2	1	19	female	4	21	d	DV_126_C2_076.bmp	d	4910
SG_MatchingHamood_14_V1_2	1	19	female	4	22	s	C2_194_DV_194.bmp	s	1102
SG_MatchingHamood_14_V1_2	1	19	female	4	23	s	C2_181_Dv_181.bmp	s	985
SG_MatchingHamood_14_V1_2	1	19	female	4	24	s	DV_166_C2_166.bmp	s	893
SG_MatchingHamood_14_V1_2	1	19	female	4	25	s	C2_158_DV_158.bmp	s	749
SG_MatchingHamood_14_V1_2	1	19	female	4	26	s	C2_226_DV_226.bmp	s	1653
SG_MatchingHamood_14_V1_2	1	19	female	4	27	s	C2_155_DV_155.bmp	s	1161
SG_MatchingHamood_14_V1_2	1	19	female	4	28	d	DV_129_C2_199.bmp	s	3102
SG_MatchingHamood_14_V1_2	1	19	female	4	29	d	DV_091_C2_211.bmp	d	3352
SG_MatchingHamood_14_V1_2	1	19	female	4	30	d	DV_088_C2_295.bmp	d	1510
SG_MatchingHamood_14_V1_2	1	19	female	4	31	s	C2_207_DV_207.bmp	s	1551
SG_MatchingHamood_14_V1_2	1	19	female	4	32	d	DV_053_C2_208.bmp	s	1919
SG_MatchingHamood_14_V1_2	1	19	female	4	33	s	C2_247_DV_247.bmp	s	903
SG_MatchingHamood_14_V1_2	1	19	female	4	34	d	DV_108_C2_038.bmp	s	825
SG_MatchingHamood_14_V1_2	1	19	female	4	35	d	DV_094_C2_022.bmp	d	836
SG_MatchingHamood_14_V1_2	1	19	female	4	36	d	DV_074_C2_075.bmp	s	1201
SG_MatchingHamood_14_V1_2	1	19	female	4	37	d	DV_052_C2_264.bmp	s	933
SG_MatchingHamood_14_V1_2	1	19	female	4	38	s	C2_243_DV_243.bmp	s	869
SG_MatchingHamood_14_V1_2	1	19	female	4	39	d	DV_081_C2_282.bmp	s	824
SG_MatchingHamood_14_V1_2	1	19	female	4	40	d	DV_178_C2_060.bmp	d	1443
SG_MatchingHamood_14_V1_2	1	19	female	5	1	s	DV_265_C2_265.bmp	s	1095
SG_MatchingHamood_14_V1_2	1	19	female	5	2	d	DV_154_C2_042.bmp	d	2070
SG_MatchingHamood_14_V1_2	1	19	female	5	3	d	DV_237_C2_297.bmp	s	1235
SG_MatchingHamood_14_V1_2	1	19	female	5	4	s	DV_298_C2_298.bmp	s	798
SG_MatchingHamood_14_V1_2	1	19	female	5	5	d	DV_238_C2_218.bmp	s	1186
SG_MatchingHamood_14_V1_2	1	19	female	5	6	d	DV_244_C2_042.bmp	d	1681
SG_MatchingHamood_14_V1_2	1	19	female	5	7	s	C2_278_DV_278.bmp	s	794
SG_MatchingHamood_14_V1_2	1	19	female	5	8	s	C2_257_DV_257.bmp	s	951
SG_MatchingHamood_14_V1_2	1	19	female	5	9	s	DV_259_C2_259.bmp	s	918
SG_MatchingHamood_14_V1_2	1	19	female	5	10	s	DV_274_C2_274.bmp	d	631
SG_MatchingHamood_14_V1_2	1	19	female	5	11	d	DV_199_C2_125.bmp	d	1059
SG_MatchingHamood_14_V1_2	1	19	female	5	12	d	DV_254_C2_287.bmp	s	1260
SG_MatchingHamood_14_V1_2	1	19	female	5	13	s	C2_294_DV_294.bmp	d	1423
SG_MatchingHamood_14_V1_2	1	19	female	5	14	d	DV_295_C2_216.bmp	s	1357
SG_MatchingHamood_14_V1_2	1	19	female	5	15	d	C2_083_DV_108.bmp	d	796
SG_MatchingHamood_14_V1_2	1	19	female	5	16	s	DV_299_C2_299.bmp	s	1297
SG_MatchingHamood_14_V1_2	1	19	female	5	17	s	C2_260_DV_260.bmp	s	1482
SG_MatchingHamood_14_V1_2	1	19	female	5	18	d	DV_208_C2_183.bmp	s	754
SG_MatchingHamood_14_V1_2	1	19	female	5	19	s	C2_258_DV_258.bmp	s	697
SG_MatchingHamood_14_V1_2	1	19	female	5	20	s	DV_284_C2_284.bmp	s	1274
SG_MatchingHamood_14_V1_2	1	19	female	5	21	d	DV_170_C2_270.bmp	s	854
SG_MatchingHamood_14_V1_2	1	19	female	5	22	d	DV_296_C2_235.bmp	d	1472
SG_MatchingHamood_14_V1_2	1	19	female	5	23	s	C2_290_DV_290.bmp	d	1346
SG_MatchingHamood_14_V1_2	1	19	female	5	24	s	DV_267_C2_267.bmp	s	777
SG_MatchingHamood_14_V1_2	1	19	female	5	25	d	DV_280_C2_003.bmp	d	920
SG_MatchingHamood_14_V1_2	1	19	female	5	26	d	DV_133_C2_139.bmp	s	1119
SG_MatchingHamood_14_V1_2	1	19	female	5	27	s	C2_288_DV_288.bmp	d	575
SG_MatchingHamood_14_V1_2	1	19	female	5	28	s	C2_302_DV_302.bmp	s	734
SG_MatchingHamood_14_V1_2	1	19	female	5	29	d	DV_178_C2_099.bmp	s	1445
SG_MatchingHamood_14_V1_2	1	19	female	5	30	d	DV_132_C2_168.bmp	s	1872
SG_MatchingHamood_14_V1_2	1	19	female	5	31	s	DV_286_C2_286.bmp	d	1634
SG_MatchingHamood_14_V1_2	1	19	female	5	32	d	DV_217_C2_185.bmp	s	1101
SG_MatchingHamood_14_V1_2	1	19	female	5	33	d	DV_219_C2_135.bmp	s	1093
SG_MatchingHamood_14_V1_2	1	19	female	5	34	d	DV_203_C2_277.bmp	d	2792
SG_MatchingHamood_14_V1_2	1	19	female	5	35	s	DV_300_C2_300.bmp	s	901
SG_MatchingHamood_14_V1_2	1	19	female	5	36	s	C2_256_DV_256.bmp	s	758
SG_MatchingHamood_14_V1_2	1	19	female	5	37	d	DV_277_C2_110.bmp	d	1620
SG_MatchingHamood_14_V1_2	1	19	female	5	38	s	C2_271_DV_271.bmp	s	815
SG_MatchingHamood_14_V1_2	1	19	female	5	39	d	C2_008_DV_039.bmp	s	2557
SG_MatchingHamood_14_V1_2	1	19	female	5	40	s	C2_291_DV_291.bmp	s	730
SG_MatchingHamood_14_V1_3	1	19	female	1	1	s	C2_031_DV_031.bmp	s	1291
SG_MatchingHamood_14_V1_3	1	19	female	1	2	s	C2_034_DV_034.bmp	s	3125
SG_MatchingHamood_14_V1_3	1	19	female	1	3	d	C2_023_DV_304.bmp	s	1572
SG_MatchingHamood_14_V1_3	1	19	female	1	4	s	C2_014_DV_014.bmp	s	904
SG_MatchingHamood_14_V1_3	1	19	female	1	5	s	C2_028_DV_028.bmp	s	2906
SG_MatchingHamood_14_V1_3	1	19	female	1	6	d	C2_009_DV_033.bmp	d	2339
SG_MatchingHamood_14_V1_3	1	19	female	1	7	s	C2_035_DV_035.bmp	s	6155
SG_MatchingHamood_14_V1_3	1	19	female	1	8	s	DV_062_C2_062.bmp	s	1458
SG_MatchingHamood_14_V1_3	1	19	female	1	9	s	C2_043_DV_043.bmp	s	1293
SG_MatchingHamood_14_V1_3	1	19	female	1	10	s	C2_054_DV_054.bmp	s	1087
SG_MatchingHamood_14_V1_3	1	19	female	1	11	d	C2_010_DV_303.bmp	s	2711
SG_MatchingHamood_14_V1_3	1	19	female	1	12	d	C2_041_DV_044.bmp	d	2552
SG_MatchingHamood_14_V1_3	1	19	female	1	13	s	DV_029_C2_029.bmp	s	5452
SG_MatchingHamood_14_V1_3	1	19	female	1	14	d	C2_018_DV_019.bmp	d	1856
SG_MatchingHamood_14_V1_3	1	19	female	1	15	d	C2_051_DV_238.bmp	d	1234
SG_MatchingHamood_14_V1_3	1	19	female	1	16	d	C2_033_DV_180.bmp	d	1351
SG_MatchingHamood_14_V1_3	1	19	female	1	17	d	C2_012_DV_205.bmp	s	2669
SG_MatchingHamood_14_V1_3	1	19	female	1	18	d	C2_037_DV_085.bmp	s	2456
SG_MatchingHamood_14_V1_3	1	19	female	1	19	s	C2_017_DV_017.bmp	s	2603
SG_MatchingHamood_14_V1_3	1	19	female	1	20	s	C2_040_DV_040.bmp	s	1351
SG_MatchingHamood_14_V1_3	1	19	female	1	21	d	C2_024_DV_030.bmp	d	1204
SG_MatchingHamood_14_V1_3	1	19	female	1	22	s	C2_005_DV_005.bmp	s	2082
SG_MatchingHamood_14_V1_3	1	19	female	1	23	s	C2_025_DV_025.bmp	s	2467
SG_MatchingHamood_14_V1_3	1	19	female	1	24	s	DV_015_C2_015.bmp	s	1044
SG_MatchingHamood_14_V1_3	1	19	female	1	25	d	C2_038_DV_081.bmp	s	1990
SG_MatchingHamood_14_V1_3	1	19	female	1	26	d	DV_303_C2_217.bmp	d	870
SG_MatchingHamood_14_V1_3	1	19	female	1	27	d	C2_004_DV_293.bmp	d	1255
SG_MatchingHamood_14_V1_3	1	19	female	1	28	d	C2_007_DV_097.bmp	d	1331
SG_MatchingHamood_14_V1_3	1	19	female	1	29	s	C2_061_DV_061.bmp	s	946
SG_MatchingHamood_14_V1_3	1	19	female	1	30	s	C2_007_DV_007.bmp	s	3479
SG_MatchingHamood_14_V1_3	1	19	female	1	31	d	C2_261_DV_201.bmp	s	3146
SG_MatchingHamood_14_V1_3	1	19	female	1	32	s	C2_036_DV_036.bmp	d	3224
SG_MatchingHamood_14_V1_3	1	19	female	1	33	d	C2_021_DV_087.bmp	s	2043
SG_MatchingHamood_14_V1_3	1	19	female	1	34	s	C2_016_DV_016.bmp	s	1709
SG_MatchingHamood_14_V1_3	1	19	female	1	35	d	DV_129_C2_092.bmp	d	6119
SG_MatchingHamood_14_V1_3	1	19	female	1	36	d	C2_039_DV_072.bmp	s	1440
SG_MatchingHamood_14_V1_3	1	19	female	1	37	s	C2_056_DV_056.bmp	s	971
SG_MatchingHamood_14_V1_3	1	19	female	1	38	s	DV_046_C2_046.bmp	s	1513
SG_MatchingHamood_14_V1_3	1	19	female	1	39	d	C2_011_DV_049.bmp	d	2489
SG_MatchingHamood_14_V1_3	1	19	female	1	40	d	C2_050_DV_215.bmp	d	3883
SG_MatchingHamood_14_V1_3	1	19	female	2	1	s	DV_089_C2_089.bmp	s	1788
SG_MatchingHamood_14_V1_3	1	19	female	2	2	d	C2_218_DV_109.bmp	s	1378
SG_MatchingHamood_14_V1_3	1	19	female	2	3	s	DV_086_C2_086.bmp	s	1400
SG_MatchingHamood_14_V1_3	1	19	female	2	4	d	C2_098_DV_024.bmp	d	2236
SG_MatchingHamood_14_V1_3	1	19	female	2	5	d	C2_123_DV_223.bmp	s	1648
SG_MatchingHamood_14_V1_3	1	19	female	2	6	d	C2_182_DV_184.bmp	d	3514
SG_MatchingHamood_14_V1_3	1	19	female	2	7	s	C2_084_DV_084.bmp	s	923
SG_MatchingHamood_14_V1_3	1	19	female	2	8	s	C2_079_DV_079.bmp	d	954
SG_MatchingHamood_14_V1_3	1	19	female	2	9	d	C2_143_DV_254.bmp	s	697
SG_MatchingHamood_14_V1_3	1	19	female	2	10	d	C2_055_DV_059.bmp	d	1018
SG_MatchingHamood_14_V1_3	1	19	female	2	11	d	C2_174_DV_183.bmp	s	1678
SG_MatchingHamood_14_V1_3	1	19	female	2	12	s	DV_103_C2_103.bmp	s	1664
SG_MatchingHamood_14_V1_3	1	19	female	2	13	s	C2_071_DV_071.bmp	s	1266
SG_MatchingHamood_14_V1_3	1	19	female	2	14	s	C2_101_DV_101.bmp	s	1396
SG_MatchingHamood_14_V1_3	1	19	female	2	15	s	DV_100_C2_100.bmp	s	1176
SG_MatchingHamood_14_V1_3	1	19	female	2	16	s	C2_082_DV_082.bmp	s	679
SG_MatchingHamood_14_V1_3	1	19	female	2	17	s	C2_073_DV_073.bmp	s	1185
SG_MatchingHamood_14_V1_3	1	19	female	2	18	d	C2_076_DV_051.bmp	s	9557
SG_MatchingHamood_14_V1_3	1	19	female	2	19	d	C2_108_DV_282.bmp	s	862
SG_MatchingHamood_14_V1_3	1	19	female	2	20	d	C2_002_DV_041.bmp	d	1103
SG_MatchingHamood_14_V1_3	1	19	female	2	21	s	DV_104_C2_104.bmp	s	807
SG_MatchingHamood_14_V1_3	1	19	female	2	22	d	C2_206_DV_077.bmp	s	1117
SG_MatchingHamood_14_V1_3	1	19	female	2	23	d	C2_095_DV_229.bmp	s	9244
SG_MatchingHamood_14_V1_3	1	19	female	2	24	d	C2_070_DV_012.bmp	d	6943
SG_MatchingHamood_14_V1_3	1	19	female	2	25	d	C2_139_DV_120.bmp	s	6396
SG_MatchingHamood_14_V1_3	1	19	female	2	26	s	C2_066_DV_066.bmp	s	1169
SG_MatchingHamood_14_V1_3	1	19	female	2	27	s	C2_078_DV_078.bmp	s	1166
SG_MatchingHamood_14_V1_3	1	19	female	2	28	d	C2_171_DV_185.bmp	d	2558
SG_MatchingHamood_14_V1_3	1	19	female	2	29	d	C2_092_DV_227.bmp	d	2765
SG_MatchingHamood_14_V1_3	1	19	female	2	30	s	C2_080_DV_080.bmp	s	1068
SG_MatchingHamood_14_V1_3	1	19	female	2	31	d	C2_091_DV_283.bmp	s	1260
SG_MatchingHamood_14_V1_3	1	19	female	2	32	s	C2_068_DV_068.bmp	s	799
SG_MatchingHamood_14_V1_3	1	19	female	2	33	s	C2_063_DV_063.bmp	s	1117
SG_MatchingHamood_14_V1_3	1	19	female	2	34	s	C2_102_DV_102.bmp	s	748
SG_MatchingHamood_14_V1_3	1	19	female	2	35	s	C2_069_DV_069.bmp	s	804
SG_MatchingHamood_14_V1_3	1	19	female	2	36	s	C2_065_DV_065.bmp	s	744
SG_MatchingHamood_14_V1_3	1	19	female	2	37	d	C2_057_DV_067.bmp	d	1590
SG_MatchingHamood_14_V1_3	1	19	female	2	38	d	C2_117_DV_219.bmp	d	2805
SG_MatchingHamood_14_V1_3	1	19	female	2	39	d	C2_211_DV_128.bmp	d	1778
SG_MatchingHamood_14_V1_3	1	19	female	2	40	s	DV_064_C2_064.bmp	s	1216
SG_MatchingHamood_14_V1_3	1	19	female	3	1	d	DV_037_C2_303.bmp	d	1172
SG_MatchingHamood_14_V1_3	1	19	female	3	2	d	C2_242_DV_246.bmp	d	1143
SG_MatchingHamood_14_V1_3	1	19	female	3	3	d	C2_232_DV_048.bmp	d	1376
SG_MatchingHamood_14_V1_3	1	19	female	3	4	d	C2_003_DV_018.bmp	d	941
SG_MatchingHamood_14_V1_3	1	19	female	3	5	s	DV_118_C2_118.bmp	d	911
SG_MatchingHamood_14_V1_3	1	19	female	3	6	d	C2_240_DV_044.bmp	d	1239
SG_MatchingHamood_14_V1_3	1	19	female	3	7	d	DV_032_C2_153.bmp	s	2298
SG_MatchingHamood_14_V1_3	1	19	female	3	8	s	DV_137_C2_137.bmp	s	1074
SG_MatchingHamood_14_V1_3	1	19	female	3	9	s	C2_115_DV_115.bmp	s	1307
SG_MatchingHamood_14_V1_3	1	19	female	3	10	d	C2_252_DV_125.bmp	d	1997
SG_MatchingHamood_14_V1_3	1	19	female	3	11	d	DV_009_C2_180.bmp	d	1345
SG_MatchingHamood_14_V1_3	1	19	female	3	12	s	C2_112_DV_112.bmp	d	3129
SG_MatchingHamood_14_V1_3	1	19	female	3	13	s	C2_119_DV_119.bmp	d	2336
SG_MatchingHamood_14_V1_3	1	19	female	3	14	d	C2_239_DV_114.bmp	d	2367
SG_MatchingHamood_14_V1_3	1	19	female	3	15	d	C2_266_DV_227.bmp	d	1581
SG_MatchingHamood_14_V1_3	1	19	female	3	16	d	DV_024_C2_085.bmp	d	2059
SG_MatchingHamood_14_V1_3	1	19	female	3	17	s	DV_111_C2_111.bmp	d	1806
SG_MatchingHamood_14_V1_3	1	19	female	3	18	s	DV_141_C2_141.bmp	s	3378
SG_MatchingHamood_14_V1_3	1	19	female	3	19	d	C2_289_DV_039.bmp	s	3399
SG_MatchingHamood_14_V1_3	1	19	female	3	20	s	C2_146_DV_146.bmp	s	949
SG_MatchingHamood_14_V1_3	1	19	female	3	21	d	C2_249_DV_083.bmp	s	844
SG_MatchingHamood_14_V1_3	1	19	female	3	22	d	DV_020_C2_090.bmp	s	655
SG_MatchingHamood_14_V1_3	1	19	female	3	23	s	C2_144_DV_144.bmp	d	794
SG_MatchingHamood_14_V1_3	1	19	female	3	24	d	C2_246_DV_160.bmp	d	848
SG_MatchingHamood_14_V1_3	1	19	female	3	25	d	C2_304_DV_099.bmp	s	2265
SG_MatchingHamood_14_V1_3	1	19	female	3	26	s	C2_113_DV_113.bmp	s	1372
SG_MatchingHamood_14_V1_3	1	19	female	3	27	d	DV_013_C2_235.bmp	s	5216
SG_MatchingHamood_14_V1_3	1	19	female	3	28	s	C2_124_DV_124.bmp	s	965
SG_MatchingHamood_14_V1_3	1	19	female	3	29	s	C2_152_DV_152.bmp	s	1091
SG_MatchingHamood_14_V1_3	1	19	female	3	30	s	C2_134_DV_134.bmp	s	1357
SG_MatchingHamood_14_V1_3	1	19	female	3	31	d	DV_012_C2_205.bmp	s	9164
SG_MatchingHamood_14_V1_3	1	19	female	3	32	s	C2_142_DV_142.bmp	s	4051
SG_MatchingHamood_14_V1_3	1	19	female	3	33	d	C2_261_DV_287.bmp	d	2156
SG_MatchingHamood_14_V1_3	1	19	female	3	34	d	C2_223_DV_242.bmp	s	3197
SG_MatchingHamood_14_V1_3	1	19	female	3	35	s	C2_131_DV_131.bmp	d	2801
SG_MatchingHamood_14_V1_3	1	19	female	3	36	s	C2_105_DV_105.bmp	s	1118
SG_MatchingHamood_14_V1_3	1	19	female	3	37	s	DV_127_C2_127.bmp	s	717
SG_MatchingHamood_14_V1_3	1	19	female	3	38	s	C2_140_DV_140.bmp	s	1069
SG_MatchingHamood_14_V1_3	1	19	female	3	39	s	DV_147_C2_147.bmp	s	1055
SG_MatchingHamood_14_V1_3	1	19	female	3	40	s	C2_116_DV_116.bmp	s	1377
SG_MatchingHamood_14_V1_3	1	19	female	4	1	d	DV_039_C2_296.bmp	d	2950
SG_MatchingHamood_14_V1_3	1	19	female	4	2	s	C2_247_DV_247.bmp	d	1013
SG_MatchingHamood_14_V1_3	1	19	female	4	3	s	C2_207_DV_207.bmp	s	1018
SG_MatchingHamood_14_V1_3	1	19	female	4	4	d	DV_160_C2_154.bmp	d	2085
SG_MatchingHamood_14_V1_3	1	19	female	4	5	s	C2_157_DV_157.bmp	s	1991
SG_MatchingHamood_14_V1_3	1	19	female	4	6	s	C2_226_DV_226.bmp	s	780
SG_MatchingHamood_14_V1_3	1	19	female	4	7	s	DV_200_C2_200.bmp	s	986
SG_MatchingHamood_14_V1_3	1	19	female	4	8	s	DV_248_C2_248.bmp	s	1368
SG_MatchingHamood_14_V1_3	1	19	female	4	9	s	DV_231_C2_231.bmp	s	789
SG_MatchingHamood_14_V1_3	1	19	female	4	10	d	DV_081_C2_282.bmp	d	7209
SG_MatchingHamood_14_V1_3	1	19	female	4	11	s	DV_161_C2_161.bmp	d	2190
SG_MatchingHamood_14_V1_3	1	19	female	4	12	d	DV_132_C2_210.bmp	d	7131
SG_MatchingHamood_14_V1_3	1	19	female	4	13	d	DV_126_C2_076.bmp	d	1229
SG_MatchingHamood_14_V1_3	1	19	female	4	14	d	DV_114_C2_126.bmp	d	895
SG_MatchingHamood_14_V1_3	1	19	female	4	15	d	DV_045_C2_027.bmp	d	1664
SG_MatchingHamood_14_V1_3	1	19	female	4	16	s	C2_158_DV_158.bmp	s	947
SG_MatchingHamood_14_V1_3	1	19	female	4	17	d	DV_129_C2_199.bmp	d	1401
SG_MatchingHamood_14_V1_3	1	19	female	4	18	d	DV_094_C2_022.bmp	d	1005
SG_MatchingHamood_14_V1_3	1	19	female	4	19	d	DV_052_C2_264.bmp	s	1035
SG_MatchingHamood_14_V1_3	1	19	female	4	20	s	C2_194_DV_194.bmp	s	1173
SG_MatchingHamood_14_V1_3	1	19	female	4	21	s	DV_204_C2_204.bmp	s	882
SG_MatchingHamood_14_V1_3	1	19	female	4	22	s	C2_243_DV_243.bmp	s	1188
SG_MatchingHamood_14_V1_3	1	19	female	4	23	d	DV_130_C2_253.bmp	s	1756
SG_MatchingHamood_14_V1_3	1	19	female	4	24	s	C2_181_Dv_181.bmp	s	2297
SG_MatchingHamood_14_V1_3	1	19	female	4	25	s	DV_167_C2_167.bmp	s	1003
SG_MatchingHamood_14_V1_3	1	19	female	4	26	s	DV_166_C2_166.bmp	s	1104
SG_MatchingHamood_14_V1_3	1	19	female	4	27	d	DV_178_C2_060.bmp	d	3271
SG_MatchingHamood_14_V1_3	1	19	female	4	28	s	DV_190_C2_190.bmp	d	1384
SG_MatchingHamood_14_V1_3	1	19	female	4	29	s	C2_155_DV_155.bmp	s	1726
SG_MatchingHamood_14_V1_3	1	19	female	4	30	d	DV_048_C2_175.bmp	d	902
SG_MatchingHamood_14_V1_3	1	19	female	4	31	s	DV_214_C2_214.bmp	s	1256
SG_MatchingHamood_14_V1_3	1	19	female	4	32	s	DV_222_C2_222.bmp	s	1121
SG_MatchingHamood_14_V1_3	1	19	female	4	33	s	C2_172_DV_172.bmp	s	1363
SG_MatchingHamood_14_V1_3	1	19	female	4	34	d	DV_108_C2_038.bmp	s	3592
SG_MatchingHamood_14_V1_3	1	19	female	4	35	d	DV_053_C2_208.bmp	d	1535
SG_MatchingHamood_14_V1_3	1	19	female	4	36	d	DV_088_C2_295.bmp	s	1982
SG_MatchingHamood_14_V1_3	1	19	female	4	37	d	DV_120_C2_133.bmp	s	1754
SG_MatchingHamood_14_V1_3	1	19	female	4	38	d	DV_074_C2_075.bmp	s	658
SG_MatchingHamood_14_V1_3	1	19	female	4	39	d	DV_109_C2_268.bmp	d	1203
SG_MatchingHamood_14_V1_3	1	19	female	4	40	d	DV_091_C2_211.bmp	s	2624
SG_MatchingHamood_14_V1_3	1	19	female	5	1	s	DV_265_C2_265.bmp	d	2414
SG_MatchingHamood_14_V1_3	1	19	female	5	2	s	C2_291_DV_291.bmp	d	1201
SG_MatchingHamood_14_V1_3	1	19	female	5	3	s	DV_284_C2_284.bmp	s	1340
SG_MatchingHamood_14_V1_3	1	19	female	5	4	d	C2_008_DV_039.bmp	s	1282
SG_MatchingHamood_14_V1_3	1	19	female	5	5	d	DV_170_C2_270.bmp	d	1276
SG_MatchingHamood_14_V1_3	1	19	female	5	6	s	DV_298_C2_298.bmp	d	2317
SG_MatchingHamood_14_V1_3	1	19	female	5	7	d	DV_238_C2_218.bmp	d	767
SG_MatchingHamood_14_V1_3	1	19	female	5	8	s	C2_256_DV_256.bmp	d	998
SG_MatchingHamood_14_V1_3	1	19	female	5	9	s	C2_288_DV_288.bmp	s	1153
SG_MatchingHamood_14_V1_3	1	19	female	5	10	d	DV_254_C2_287.bmp	d	799
SG_MatchingHamood_14_V1_3	1	19	female	5	11	d	C2_083_DV_108.bmp	d	876
SG_MatchingHamood_14_V1_3	1	19	female	5	12	s	DV_259_C2_259.bmp	s	1503
SG_MatchingHamood_14_V1_3	1	19	female	5	13	d	DV_244_C2_042.bmp	d	1368
SG_MatchingHamood_14_V1_3	1	19	female	5	14	d	DV_133_C2_139.bmp	s	1398
SG_MatchingHamood_14_V1_3	1	19	female	5	15	d	DV_296_C2_235.bmp	s	1002
SG_MatchingHamood_14_V1_3	1	19	female	5	16	d	DV_280_C2_003.bmp	d	1246
SG_MatchingHamood_14_V1_3	1	19	female	5	17	s	C2_260_DV_260.bmp	s	833
SG_MatchingHamood_14_V1_3	1	19	female	5	18	s	C2_290_DV_290.bmp	d	926
SG_MatchingHamood_14_V1_3	1	19	female	5	19	d	DV_237_C2_297.bmp	s	958
SG_MatchingHamood_14_V1_3	1	19	female	5	20	d	DV_203_C2_277.bmp	s	820
SG_MatchingHamood_14_V1_3	1	19	female	5	21	s	DV_274_C2_274.bmp	s	1417
SG_MatchingHamood_14_V1_3	1	19	female	5	22	s	DV_286_C2_286.bmp	s	906
SG_MatchingHamood_14_V1_3	1	19	female	5	23	d	DV_277_C2_110.bmp	s	868
SG_MatchingHamood_14_V1_3	1	19	female	5	24	d	DV_199_C2_125.bmp	d	872
SG_MatchingHamood_14_V1_3	1	19	female	5	25	s	C2_302_DV_302.bmp	s	1224
SG_MatchingHamood_14_V1_3	1	19	female	5	26	d	DV_208_C2_183.bmp	s	893
SG_MatchingHamood_14_V1_3	1	19	female	5	27	s	DV_300_C2_300.bmp	s	895
SG_MatchingHamood_14_V1_3	1	19	female	5	28	d	DV_178_C2_099.bmp	s	1161
SG_MatchingHamood_14_V1_3	1	19	female	5	29	s	C2_278_DV_278.bmp	d	878
SG_MatchingHamood_14_V1_3	1	19	female	5	30	s	C2_257_DV_257.bmp	s	1294
SG_MatchingHamood_14_V1_3	1	19	female	5	31	d	DV_217_C2_185.bmp	s	1409
SG_MatchingHamood_14_V1_3	1	19	female	5	32	s	DV_299_C2_299.bmp	s	870
SG_MatchingHamood_14_V1_3	1	19	female	5	33	d	DV_132_C2_168.bmp	s	936
SG_MatchingHamood_14_V1_3	1	19	female	5	34	d	DV_219_C2_135.bmp	s	728
SG_MatchingHamood_14_V1_3	1	19	female	5	35	d	DV_295_C2_216.bmp	s	686
SG_MatchingHamood_14_V1_3	1	19	female	5	36	s	C2_271_DV_271.bmp	s	728
SG_MatchingHamood_14_V1_3	1	19	female	5	37	s	DV_267_C2_267.bmp	s	927
SG_MatchingHamood_14_V1_3	1	19	female	5	38	s	C2_294_DV_294.bmp	s	766
SG_MatchingHamood_14_V1_3	1	19	female	5	39	s	C2_258_DV_258.bmp	s	821
SG_MatchingHamood_14_V1_3	1	19	female	5	40	d	DV_154_C2_042.bmp	d	976
SG_MatchingHamood_14_V1_4	1	19	female	1	1	d	C2_012_DV_205.bmp	s	5384
SG_MatchingHamood_14_V1_4	1	19	female	1	2	d	C2_018_DV_019.bmp	s	8782
SG_MatchingHamood_14_V1_4	1	19	female	1	3	s	C2_025_DV_025.bmp	s	1052
SG_MatchingHamood_14_V1_4	1	19	female	1	4	d	C2_051_DV_238.bmp	d	1770
SG_MatchingHamood_14_V1_4	1	19	female	1	5	s	C2_061_DV_061.bmp	s	808
SG_MatchingHamood_14_V1_4	1	19	female	1	6	d	C2_009_DV_033.bmp	d	952
SG_MatchingHamood_14_V1_4	1	19	female	1	7	s	C2_007_DV_007.bmp	s	1704
SG_MatchingHamood_14_V1_4	1	19	female	1	8	s	DV_015_C2_015.bmp	s	714
SG_MatchingHamood_14_V1_4	1	19	female	1	9	s	DV_046_C2_046.bmp	s	794
SG_MatchingHamood_14_V1_4	1	19	female	1	10	s	C2_014_DV_014.bmp	s	824
SG_MatchingHamood_14_V1_4	1	19	female	1	11	s	C2_043_DV_043.bmp	s	894
SG_MatchingHamood_14_V1_4	1	19	female	1	12	d	C2_007_DV_097.bmp	d	976
SG_MatchingHamood_14_V1_4	1	19	female	1	13	s	C2_040_DV_040.bmp	s	999
SG_MatchingHamood_14_V1_4	1	19	female	1	14	s	C2_035_DV_035.bmp	s	1077
SG_MatchingHamood_14_V1_4	1	19	female	1	15	d	C2_023_DV_304.bmp	s	1544
SG_MatchingHamood_14_V1_4	1	19	female	1	16	d	C2_021_DV_087.bmp	s	18264
SG_MatchingHamood_14_V1_4	1	19	female	1	17	s	C2_031_DV_031.bmp	s	971
SG_MatchingHamood_14_V1_4	1	19	female	1	18	s	C2_005_DV_005.bmp	s	2035
SG_MatchingHamood_14_V1_4	1	19	female	1	19	d	C2_050_DV_215.bmp	s	959
SG_MatchingHamood_14_V1_4	1	19	female	1	20	s	C2_017_DV_017.bmp	s	943
SG_MatchingHamood_14_V1_4	1	19	female	1	21	s	C2_016_DV_016.bmp	s	727
SG_MatchingHamood_14_V1_4	1	19	female	1	22	s	C2_056_DV_056.bmp	s	664
SG_MatchingHamood_14_V1_4	1	19	female	1	23	d	C2_024_DV_030.bmp	s	747
SG_MatchingHamood_14_V1_4	1	19	female	1	24	d	C2_039_DV_072.bmp	d	1148
SG_MatchingHamood_14_V1_4	1	19	female	1	25	d	C2_033_DV_180.bmp	d	1147
SG_MatchingHamood_14_V1_4	1	19	female	1	26	d	C2_041_DV_044.bmp	d	996
SG_MatchingHamood_14_V1_4	1	19	female	1	27	d	C2_010_DV_303.bmp	d	1737
SG_MatchingHamood_14_V1_4	1	19	female	1	28	d	C2_038_DV_081.bmp	d	2330
SG_MatchingHamood_14_V1_4	1	19	female	1	29	d	C2_004_DV_293.bmp	d	2579
SG_MatchingHamood_14_V1_4	1	19	female	1	30	d	C2_261_DV_201.bmp	s	1297
SG_MatchingHamood_14_V1_4	1	19	female	1	31	s	DV_062_C2_062.bmp	s	820
SG_MatchingHamood_14_V1_4	1	19	female	1	32	s	C2_036_DV_036.bmp	s	785
SG_MatchingHamood_14_V1_4	1	19	female	1	33	d	C2_011_DV_049.bmp	d	919
SG_MatchingHamood_14_V1_4	1	19	female	1	34	s	C2_054_DV_054.bmp	s	1512
SG_MatchingHamood_14_V1_4	1	19	female	1	35	s	C2_028_DV_028.bmp	s	1649
SG_MatchingHamood_14_V1_4	1	19	female	1	36	d	C2_037_DV_085.bmp	s	3764
SG_MatchingHamood_14_V1_4	1	19	female	1	37	s	DV_029_C2_029.bmp	s	1299
SG_MatchingHamood_14_V1_4	1	19	female	1	38	d	DV_129_C2_092.bmp	d	1229
SG_MatchingHamood_14_V1_4	1	19	female	1	39	s	C2_034_DV_034.bmp	s	1906
SG_MatchingHamood_14_V1_4	1	19	female	1	40	d	DV_303_C2_217.bmp	d	3414
SG_MatchingHamood_14_V1_4	1	19	female	2	1	s	DV_103_C2_103.bmp	s	1345
SG_MatchingHamood_14_V1_4	1	19	female	2	2	d	C2_143_DV_254.bmp	d	1994
SG_MatchingHamood_14_V1_4	1	19	female	2	3	d	C2_117_DV_219.bmp	d	2207
SG_MatchingHamood_14_V1_4	1	19	female	2	4	s	C2_063_DV_063.bmp	s	941
SG_MatchingHamood_14_V1_4	1	19	female	2	5	d	C2_123_DV_223.bmp	s	975
SG_MatchingHamood_14_V1_4	1	19	female	2	6	s	C2_078_DV_078.bmp	s	2454
SG_MatchingHamood_14_V1_4	1	19	female	2	7	d	C2_002_DV_041.bmp	d	2459
SG_MatchingHamood_14_V1_4	1	19	female	2	8	s	C2_079_DV_079.bmp	s	5189
SG_MatchingHamood_14_V1_4	1	19	female	2	9	d	C2_095_DV_229.bmp	s	2276
SG_MatchingHamood_14_V1_4	1	19	female	2	10	s	C2_069_DV_069.bmp	s	912
SG_MatchingHamood_14_V1_4	1	19	female	2	11	s	DV_104_C2_104.bmp	s	1081
SG_MatchingHamood_14_V1_4	1	19	female	2	12	d	C2_108_DV_282.bmp	s	1068
SG_MatchingHamood_14_V1_4	1	19	female	2	13	s	C2_101_DV_101.bmp	s	1231
SG_MatchingHamood_14_V1_4	1	19	female	2	14	d	C2_211_DV_128.bmp	s	1004
SG_MatchingHamood_14_V1_4	1	19	female	2	15	d	C2_174_DV_183.bmp	s	1163
SG_MatchingHamood_14_V1_4	1	19	female	2	16	s	C2_071_DV_071.bmp	s	1138
SG_MatchingHamood_14_V1_4	1	19	female	2	17	d	C2_070_DV_012.bmp	s	3610
SG_MatchingHamood_14_V1_4	1	19	female	2	18	d	C2_098_DV_024.bmp	s	1726
SG_MatchingHamood_14_V1_4	1	19	female	2	19	d	C2_091_DV_283.bmp	s	1541
SG_MatchingHamood_14_V1_4	1	19	female	2	20	s	DV_100_C2_100.bmp	s	871
SG_MatchingHamood_14_V1_4	1	19	female	2	21	d	C2_055_DV_059.bmp	d	1115
SG_MatchingHamood_14_V1_4	1	19	female	2	22	s	C2_080_DV_080.bmp	s	4420
SG_MatchingHamood_14_V1_4	1	19	female	2	23	s	C2_084_DV_084.bmp	s	3680
SG_MatchingHamood_14_V1_4	1	19	female	2	24	d	C2_092_DV_227.bmp	s	3349
SG_MatchingHamood_14_V1_4	1	19	female	2	25	d	C2_076_DV_051.bmp	s	4891
SG_MatchingHamood_14_V1_4	1	19	female	2	26	s	DV_064_C2_064.bmp	s	1279
SG_MatchingHamood_14_V1_4	1	19	female	2	27	d	C2_171_DV_185.bmp	s	1337
SG_MatchingHamood_14_V1_4	1	19	female	2	28	s	DV_089_C2_089.bmp	s	3506
SG_MatchingHamood_14_V1_4	1	19	female	2	29	d	C2_139_DV_120.bmp	d	1332
SG_MatchingHamood_14_V1_4	1	19	female	2	30	d	C2_218_DV_109.bmp	s	1429
SG_MatchingHamood_14_V1_4	1	19	female	2	31	d	C2_057_DV_067.bmp	s	1521
SG_MatchingHamood_14_V1_4	1	19	female	2	32	s	DV_086_C2_086.bmp	s	1971
SG_MatchingHamood_14_V1_4	1	19	female	2	33	s	C2_073_DV_073.bmp	s	4650
SG_MatchingHamood_14_V1_4	1	19	female	2	34	s	C2_066_DV_066.bmp	s	3862
SG_MatchingHamood_14_V1_4	1	19	female	2	35	s	C2_065_DV_065.bmp	s	986
SG_MatchingHamood_14_V1_4	1	19	female	2	36	s	C2_068_DV_068.bmp	s	768
SG_MatchingHamood_14_V1_4	1	19	female	2	37	d	C2_206_DV_077.bmp	s	1416
SG_MatchingHamood_14_V1_4	1	19	female	2	38	s	C2_102_DV_102.bmp	s	1245
SG_MatchingHamood_14_V1_4	1	19	female	2	39	d	C2_182_DV_184.bmp	s	5048
SG_MatchingHamood_14_V1_4	1	19	female	2	40	s	C2_082_DV_082.bmp	s	957
SG_MatchingHamood_14_V1_4	1	19	female	3	1	s	C2_112_DV_112.bmp	s	2156
SG_MatchingHamood_14_V1_4	1	19	female	3	2	d	C2_242_DV_246.bmp	d	2444
SG_MatchingHamood_14_V1_4	1	19	female	3	3	d	C2_266_DV_227.bmp	s	1048
SG_MatchingHamood_14_V1_4	1	19	female	3	4	s	C2_119_DV_119.bmp	d	972
SG_MatchingHamood_14_V1_4	1	19	female	3	5	s	C2_146_DV_146.bmp	s	2363
SG_MatchingHamood_14_V1_4	1	19	female	3	6	d	DV_037_C2_303.bmp	s	6016
SG_MatchingHamood_14_V1_4	1	19	female	3	7	d	DV_012_C2_205.bmp	d	3831
SG_MatchingHamood_14_V1_4	1	19	female	3	8	s	DV_141_C2_141.bmp	s	1004
SG_MatchingHamood_14_V1_4	1	19	female	3	9	d	C2_239_DV_114.bmp	s	2762
SG_MatchingHamood_14_V1_4	1	19	female	3	10	s	C2_140_DV_140.bmp	s	1240
SG_MatchingHamood_14_V1_4	1	19	female	3	11	s	DV_147_C2_147.bmp	s	1165
SG_MatchingHamood_14_V1_4	1	19	female	3	12	s	C2_144_DV_144.bmp	s	1380
SG_MatchingHamood_14_V1_4	1	19	female	3	13	d	C2_223_DV_242.bmp	s	1635
SG_MatchingHamood_14_V1_4	1	19	female	3	14	d	C2_249_DV_083.bmp	s	9336
SG_MatchingHamood_14_V1_4	1	19	female	3	15	d	C2_246_DV_160.bmp	s	5313
SG_MatchingHamood_14_V1_4	1	19	female	3	16	s	C2_116_DV_116.bmp	s	1323
SG_MatchingHamood_14_V1_4	1	19	female	3	17	s	C2_152_DV_152.bmp	s	908
SG_MatchingHamood_14_V1_4	1	19	female	3	18	s	DV_137_C2_137.bmp	s	1981
SG_MatchingHamood_14_V1_4	1	19	female	3	19	d	DV_032_C2_153.bmp	d	1541
SG_MatchingHamood_14_V1_4	1	19	female	3	20	d	DV_020_C2_090.bmp	s	1525
SG_MatchingHamood_14_V1_4	1	19	female	3	21	s	DV_118_C2_118.bmp	s	3999
SG_MatchingHamood_14_V1_4	1	19	female	3	22	d	C2_240_DV_044.bmp	s	4581
SG_MatchingHamood_14_V1_4	1	19	female	3	23	d	C2_304_DV_099.bmp	s	3226
SG_MatchingHamood_14_V1_4	1	19	female	3	24	d	C2_289_DV_039.bmp	s	1471
SG_MatchingHamood_14_V1_4	1	19	female	3	25	s	C2_142_DV_142.bmp	s	1587
SG_MatchingHamood_14_V1_4	1	19	female	3	26	d	DV_009_C2_180.bmp	d	1888
SG_MatchingHamood_14_V1_4	1	19	female	3	27	d	DV_013_C2_235.bmp	s	2237
SG_MatchingHamood_14_V1_4	1	19	female	3	28	s	C2_113_DV_113.bmp	s	1088
SG_MatchingHamood_14_V1_4	1	19	female	3	29	s	C2_134_DV_134.bmp	s	1092
SG_MatchingHamood_14_V1_4	1	19	female	3	30	d	DV_024_C2_085.bmp	d	1214
SG_MatchingHamood_14_V1_4	1	19	female	3	31	s	DV_127_C2_127.bmp	s	1469
SG_MatchingHamood_14_V1_4	1	19	female	3	32	s	C2_115_DV_115.bmp	s	1671
SG_MatchingHamood_14_V1_4	1	19	female	3	33	d	C2_252_DV_125.bmp	d	1378
SG_MatchingHamood_14_V1_4	1	19	female	3	34	s	C2_105_DV_105.bmp	s	945
SG_MatchingHamood_14_V1_4	1	19	female	3	35	s	C2_124_DV_124.bmp	d	1362
SG_MatchingHamood_14_V1_4	1	19	female	3	36	d	C2_003_DV_018.bmp	s	1409
SG_MatchingHamood_14_V1_4	1	19	female	3	37	d	C2_232_DV_048.bmp	d	1046
SG_MatchingHamood_14_V1_4	1	19	female	3	38	d	C2_261_DV_287.bmp	s	5209
SG_MatchingHamood_14_V1_4	1	19	female	3	39	s	C2_131_DV_131.bmp	s	1144
SG_MatchingHamood_14_V1_4	1	19	female	3	40	s	DV_111_C2_111.bmp	d	7552
SG_MatchingHamood_14_V1_4	1	19	female	4	1	s	DV_204_C2_204.bmp	s	910
SG_MatchingHamood_14_V1_4	1	19	female	4	2	s	DV_190_C2_190.bmp	s	1072
SG_MatchingHamood_14_V1_4	1	19	female	4	3	d	DV_129_C2_199.bmp	s	10906
SG_MatchingHamood_14_V1_4	1	19	female	4	4	d	DV_160_C2_154.bmp	s	6733
SG_MatchingHamood_14_V1_4	1	19	female	4	5	s	C2_181_Dv_181.bmp	s	3325
SG_MatchingHamood_14_V1_4	1	19	female	4	6	s	DV_248_C2_248.bmp	s	847
SG_MatchingHamood_14_V1_4	1	19	female	4	7	d	DV_088_C2_295.bmp	d	1267
SG_MatchingHamood_14_V1_4	1	19	female	4	8	s	C2_158_DV_158.bmp	s	1070
SG_MatchingHamood_14_V1_4	1	19	female	4	9	s	DV_200_C2_200.bmp	s	753
SG_MatchingHamood_14_V1_4	1	19	female	4	10	s	DV_161_C2_161.bmp	s	1361
SG_MatchingHamood_14_V1_4	1	19	female	4	11	s	C2_157_DV_157.bmp	s	3729
SG_MatchingHamood_14_V1_4	1	19	female	4	12	s	C2_247_DV_247.bmp	s	5394
SG_MatchingHamood_14_V1_4	1	19	female	4	13	s	DV_231_C2_231.bmp	s	5367
SG_MatchingHamood_14_V1_4	1	19	female	4	14	d	DV_045_C2_027.bmp	d	3318
SG_MatchingHamood_14_V1_4	1	19	female	4	15	d	DV_114_C2_126.bmp	d	2856
SG_MatchingHamood_14_V1_4	1	19	female	4	16	d	DV_081_C2_282.bmp	s	1109
SG_MatchingHamood_14_V1_4	1	19	female	4	17	d	DV_126_C2_076.bmp	s	2670
SG_MatchingHamood_14_V1_4	1	19	female	4	18	d	DV_039_C2_296.bmp	s	4162
SG_MatchingHamood_14_V1_4	1	19	female	4	19	s	DV_214_C2_214.bmp	s	8569
SG_MatchingHamood_14_V1_4	1	19	female	4	20	s	C2_226_DV_226.bmp	s	817
SG_MatchingHamood_14_V1_4	1	19	female	4	21	d	DV_074_C2_075.bmp	s	1174
SG_MatchingHamood_14_V1_4	1	19	female	4	22	s	C2_207_DV_207.bmp	s	4436
SG_MatchingHamood_14_V1_4	1	19	female	4	23	d	DV_108_C2_038.bmp	s	1442
SG_MatchingHamood_14_V1_4	1	19	female	4	24	d	DV_130_C2_253.bmp	s	1726
SG_MatchingHamood_14_V1_4	1	19	female	4	25	s	C2_155_DV_155.bmp	s	2304
SG_MatchingHamood_14_V1_4	1	19	female	4	26	s	C2_194_DV_194.bmp	s	921
SG_MatchingHamood_14_V1_4	1	19	female	4	27	d	DV_053_C2_208.bmp	d	3313
SG_MatchingHamood_14_V1_4	1	19	female	4	28	d	DV_178_C2_060.bmp	d	3437
SG_MatchingHamood_14_V1_4	1	19	female	4	29	d	DV_120_C2_133.bmp	s	1178
SG_MatchingHamood_14_V1_4	1	19	female	4	30	s	C2_243_DV_243.bmp	s	1727
SG_MatchingHamood_14_V1_4	1	19	female	4	31	d	DV_048_C2_175.bmp	d	1528
SG_MatchingHamood_14_V1_4	1	19	female	4	32	s	DV_167_C2_167.bmp	s	1649
SG_MatchingHamood_14_V1_4	1	19	female	4	33	s	C2_172_DV_172.bmp	s	2493
SG_MatchingHamood_14_V1_4	1	19	female	4	34	d	DV_052_C2_264.bmp	s	2063
SG_MatchingHamood_14_V1_4	1	19	female	4	35	s	DV_166_C2_166.bmp	s	1611
SG_MatchingHamood_14_V1_4	1	19	female	4	36	s	DV_222_C2_222.bmp	s	3440
SG_MatchingHamood_14_V1_4	1	19	female	4	37	d	DV_132_C2_210.bmp	s	7949
SG_MatchingHamood_14_V1_4	1	19	female	4	38	d	DV_091_C2_211.bmp	s	1547
SG_MatchingHamood_14_V1_4	1	19	female	4	39	d	DV_109_C2_268.bmp	s	2274
SG_MatchingHamood_14_V1_4	1	19	female	4	40	d	DV_094_C2_022.bmp	s	2237
SG_MatchingHamood_14_V1_4	1	19	female	5	1	s	C2_258_DV_258.bmp	s	939
SG_MatchingHamood_14_V1_4	1	19	female	5	2	s	C2_291_DV_291.bmp	s	1090
SG_MatchingHamood_14_V1_4	1	19	female	5	3	s	DV_274_C2_274.bmp	s	1150
SG_MatchingHamood_14_V1_4	1	19	female	5	4	s	C2_290_DV_290.bmp	s	1076
SG_MatchingHamood_14_V1_4	1	19	female	5	5	d	DV_170_C2_270.bmp	d	2000
SG_MatchingHamood_14_V1_4	1	19	female	5	6	d	DV_132_C2_168.bmp	d	1654
SG_MatchingHamood_14_V1_4	1	19	female	5	7	s	DV_286_C2_286.bmp	d	1305
SG_MatchingHamood_14_V1_4	1	19	female	5	8	s	DV_300_C2_300.bmp	s	1252
SG_MatchingHamood_14_V1_4	1	19	female	5	9	d	DV_296_C2_235.bmp	d	1561
SG_MatchingHamood_14_V1_4	1	19	female	5	10	s	C2_288_DV_288.bmp	d	2600
SG_MatchingHamood_14_V1_4	1	19	female	5	11	d	C2_008_DV_039.bmp	s	1349
SG_MatchingHamood_14_V1_4	1	19	female	5	12	d	DV_203_C2_277.bmp	d	1173
SG_MatchingHamood_14_V1_4	1	19	female	5	13	d	DV_277_C2_110.bmp	s	2549
SG_MatchingHamood_14_V1_4	1	19	female	5	14	d	DV_219_C2_135.bmp	s	1868
SG_MatchingHamood_14_V1_4	1	19	female	5	15	d	C2_083_DV_108.bmp	s	2286
SG_MatchingHamood_14_V1_4	1	19	female	5	16	s	C2_278_DV_278.bmp	s	696
SG_MatchingHamood_14_V1_4	1	19	female	5	17	s	C2_257_DV_257.bmp	s	908
SG_MatchingHamood_14_V1_4	1	19	female	5	18	s	C2_302_DV_302.bmp	d	1059
SG_MatchingHamood_14_V1_4	1	19	female	5	19	d	DV_154_C2_042.bmp	s	1880
SG_MatchingHamood_14_V1_4	1	19	female	5	20	s	DV_298_C2_298.bmp	s	1643
SG_MatchingHamood_14_V1_4	1	19	female	5	21	s	DV_299_C2_299.bmp	s	1328
SG_MatchingHamood_14_V1_4	1	19	female	5	22	d	DV_280_C2_003.bmp	d	7743
SG_MatchingHamood_14_V1_4	1	19	female	5	23	s	DV_265_C2_265.bmp	s	1225
SG_MatchingHamood_14_V1_4	1	19	female	5	24	d	DV_295_C2_216.bmp	d	7469
SG_MatchingHamood_14_V1_4	1	19	female	5	25	s	C2_294_DV_294.bmp	s	4458
SG_MatchingHamood_14_V1_4	1	19	female	5	26	d	DV_199_C2_125.bmp	s	2093
SG_MatchingHamood_14_V1_4	1	19	female	5	27	d	DV_217_C2_185.bmp	s	1248
SG_MatchingHamood_14_V1_4	1	19	female	5	28	d	DV_254_C2_287.bmp	d	1147
SG_MatchingHamood_14_V1_4	1	19	female	5	29	d	DV_244_C2_042.bmp	d	3643
SG_MatchingHamood_14_V1_4	1	19	female	5	30	d	DV_178_C2_099.bmp	s	3775
SG_MatchingHamood_14_V1_4	1	19	female	5	31	s	C2_256_DV_256.bmp	s	1359
SG_MatchingHamood_14_V1_4	1	19	female	5	32	d	DV_133_C2_139.bmp	s	3294
SG_MatchingHamood_14_V1_4	1	19	female	5	33	s	C2_260_DV_260.bmp	s	1041
SG_MatchingHamood_14_V1_4	1	19	female	5	34	d	DV_238_C2_218.bmp	d	1078
SG_MatchingHamood_14_V1_4	1	19	female	5	35	s	DV_259_C2_259.bmp	s	3657
SG_MatchingHamood_14_V1_4	1	19	female	5	36	s	C2_271_DV_271.bmp	s	1581
SG_MatchingHamood_14_V1_4	1	19	female	5	37	s	DV_284_C2_284.bmp	s	1564
SG_MatchingHamood_14_V1_4	1	19	female	5	38	d	DV_208_C2_183.bmp	s	2691
SG_MatchingHamood_14_V1_4	1	19	female	5	39	s	DV_267_C2_267.bmp	s	1774
SG_MatchingHamood_14_V1_4	1	19	female	5	40	d	DV_237_C2_297.bmp	d	13780
SG_MatchingHamood_14_V1_5	1	19	female	1	1	s	DV_015_C2_015.bmp	s	7798
SG_MatchingHamood_14_V1_5	1	19	female	1	2	d	C2_011_DV_049.bmp	d	1489
SG_MatchingHamood_14_V1_5	1	19	female	1	3	d	C2_012_DV_205.bmp	d	2467
SG_MatchingHamood_14_V1_5	1	19	female	1	4	d	C2_018_DV_019.bmp	d	3302
SG_MatchingHamood_14_V1_5	1	19	female	1	5	s	C2_031_DV_031.bmp	s	934
SG_MatchingHamood_14_V1_5	1	19	female	1	6	s	C2_016_DV_016.bmp	s	662
SG_MatchingHamood_14_V1_5	1	19	female	1	7	s	C2_007_DV_007.bmp	s	990
SG_MatchingHamood_14_V1_5	1	19	female	1	8	s	DV_046_C2_046.bmp	s	1140
SG_MatchingHamood_14_V1_5	1	19	female	1	9	d	C2_038_DV_081.bmp	s	2858
SG_MatchingHamood_14_V1_5	1	19	female	1	10	d	DV_129_C2_092.bmp	d	1533
SG_MatchingHamood_14_V1_5	1	19	female	1	11	s	DV_062_C2_062.bmp	s	772
SG_MatchingHamood_14_V1_5	1	19	female	1	12	s	C2_040_DV_040.bmp	s	5604
SG_MatchingHamood_14_V1_5	1	19	female	1	13	d	C2_033_DV_180.bmp	d	832
SG_MatchingHamood_14_V1_5	1	19	female	1	14	d	C2_004_DV_293.bmp	d	1148
SG_MatchingHamood_14_V1_5	1	19	female	1	15	s	C2_028_DV_028.bmp	s	1619
SG_MatchingHamood_14_V1_5	1	19	female	1	16	d	C2_041_DV_044.bmp	d	2807
SG_MatchingHamood_14_V1_5	1	19	female	1	17	s	C2_036_DV_036.bmp	s	1740
SG_MatchingHamood_14_V1_5	1	19	female	1	18	d	C2_010_DV_303.bmp	s	1513
SG_MatchingHamood_14_V1_5	1	19	female	1	19	d	C2_023_DV_304.bmp	d	21682
SG_MatchingHamood_14_V1_5	1	19	female	1	20	d	C2_024_DV_030.bmp	d	1532
SG_MatchingHamood_14_V1_5	1	19	female	1	21	s	C2_056_DV_056.bmp	s	1669
SG_MatchingHamood_14_V1_5	1	19	female	1	22	s	C2_061_DV_061.bmp	s	1958
SG_MatchingHamood_14_V1_5	1	19	female	1	23	d	C2_007_DV_097.bmp	d	2021
SG_MatchingHamood_14_V1_5	1	19	female	1	24	d	C2_037_DV_085.bmp	s	7008
SG_MatchingHamood_14_V1_5	1	19	female	1	25	d	C2_009_DV_033.bmp	d	5318
SG_MatchingHamood_14_V1_5	1	19	female	1	26	d	C2_021_DV_087.bmp	s	2598
SG_MatchingHamood_14_V1_5	1	19	female	1	27	d	C2_039_DV_072.bmp	s	1571
SG_MatchingHamood_14_V1_5	1	19	female	1	28	s	C2_034_DV_034.bmp	s	1065
SG_MatchingHamood_14_V1_5	1	19	female	1	29	s	C2_025_DV_025.bmp	s	2067
SG_MatchingHamood_14_V1_5	1	19	female	1	30	s	DV_029_C2_029.bmp	s	1622
SG_MatchingHamood_14_V1_5	1	19	female	1	31	s	C2_005_DV_005.bmp	s	1473
SG_MatchingHamood_14_V1_5	1	19	female	1	32	d	C2_261_DV_201.bmp	s	1882
SG_MatchingHamood_14_V1_5	1	19	female	1	33	d	C2_051_DV_238.bmp	d	1061
SG_MatchingHamood_14_V1_5	1	19	female	1	34	d	DV_303_C2_217.bmp	d	1461
SG_MatchingHamood_14_V1_5	1	19	female	1	35	s	C2_035_DV_035.bmp	s	985
SG_MatchingHamood_14_V1_5	1	19	female	1	36	s	C2_043_DV_043.bmp	s	1325
SG_MatchingHamood_14_V1_5	1	19	female	1	37	s	C2_054_DV_054.bmp	s	1670
SG_MatchingHamood_14_V1_5	1	19	female	1	38	s	C2_014_DV_014.bmp	s	672
SG_MatchingHamood_14_V1_5	1	19	female	1	39	s	C2_017_DV_017.bmp	s	875
SG_MatchingHamood_14_V1_5	1	19	female	1	40	d	C2_050_DV_215.bmp	d	861
SG_MatchingHamood_14_V1_5	1	19	female	2	1	s	DV_086_C2_086.bmp	s	727
SG_MatchingHamood_14_V1_5	1	19	female	2	2	s	DV_103_C2_103.bmp	s	565
SG_MatchingHamood_14_V1_5	1	19	female	2	3	s	C2_079_DV_079.bmp	s	516
SG_MatchingHamood_14_V1_5	1	19	female	2	4	d	C2_098_DV_024.bmp	d	813
SG_MatchingHamood_14_V1_5	1	19	female	2	5	d	C2_108_DV_282.bmp	s	543
SG_MatchingHamood_14_V1_5	1	19	female	2	6	d	C2_055_DV_059.bmp	s	958
SG_MatchingHamood_14_V1_5	1	19	female	2	7	s	DV_064_C2_064.bmp	s	1502
SG_MatchingHamood_14_V1_5	1	19	female	2	8	s	C2_065_DV_065.bmp	s	1550
SG_MatchingHamood_14_V1_5	1	19	female	2	9	d	C2_002_DV_041.bmp	d	3213
SG_MatchingHamood_14_V1_5	1	19	female	2	10	s	C2_069_DV_069.bmp	s	793
SG_MatchingHamood_14_V1_5	1	19	female	2	11	s	C2_068_DV_068.bmp	s	733
SG_MatchingHamood_14_V1_5	1	19	female	2	12	s	C2_078_DV_078.bmp	s	934
SG_MatchingHamood_14_V1_5	1	19	female	2	13	s	C2_066_DV_066.bmp	d	2366
SG_MatchingHamood_14_V1_5	1	19	female	2	14	s	C2_082_DV_082.bmp	s	1020
SG_MatchingHamood_14_V1_5	1	19	female	2	15	d	C2_206_DV_077.bmp	s	984
SG_MatchingHamood_14_V1_5	1	19	female	2	16	d	C2_211_DV_128.bmp	d	1357
SG_MatchingHamood_14_V1_5	1	19	female	2	17	d	C2_117_DV_219.bmp	s	1036
SG_MatchingHamood_14_V1_5	1	19	female	2	18	s	DV_089_C2_089.bmp	s	3112
SG_MatchingHamood_14_V1_5	1	19	female	2	19	d	C2_070_DV_012.bmp	s	3279
SG_MatchingHamood_14_V1_5	1	19	female	2	20	d	C2_091_DV_283.bmp	s	3506
SG_MatchingHamood_14_V1_5	1	19	female	2	21	s	C2_102_DV_102.bmp	s	6210
SG_MatchingHamood_14_V1_5	1	19	female	2	22	s	C2_071_DV_071.bmp	s	1640
SG_MatchingHamood_14_V1_5	1	19	female	2	23	d	C2_143_DV_254.bmp	d	9026
SG_MatchingHamood_14_V1_5	1	19	female	2	24	s	DV_104_C2_104.bmp	s	982
SG_MatchingHamood_14_V1_5	1	19	female	2	25	s	DV_100_C2_100.bmp	s	1643
SG_MatchingHamood_14_V1_5	1	19	female	2	26	d	C2_218_DV_109.bmp	d	2431
SG_MatchingHamood_14_V1_5	1	19	female	2	27	d	C2_139_DV_120.bmp	s	5016
SG_MatchingHamood_14_V1_5	1	19	female	2	28	s	C2_063_DV_063.bmp	s	1157
SG_MatchingHamood_14_V1_5	1	19	female	2	29	d	C2_057_DV_067.bmp	s	1749
SG_MatchingHamood_14_V1_5	1	19	female	2	30	d	C2_076_DV_051.bmp	d	4452
SG_MatchingHamood_14_V1_5	1	19	female	2	31	d	C2_092_DV_227.bmp	s	806
SG_MatchingHamood_14_V1_5	1	19	female	2	32	d	C2_182_DV_184.bmp	s	868
SG_MatchingHamood_14_V1_5	1	19	female	2	33	d	C2_174_DV_183.bmp	s	909
SG_MatchingHamood_14_V1_5	1	19	female	2	34	s	C2_073_DV_073.bmp	d	1367
SG_MatchingHamood_14_V1_5	1	19	female	2	35	s	C2_084_DV_084.bmp	s	699
SG_MatchingHamood_14_V1_5	1	19	female	2	36	s	C2_101_DV_101.bmp	s	12404
SG_MatchingHamood_14_V1_5	1	19	female	2	37	d	C2_171_DV_185.bmp	d	7571
SG_MatchingHamood_14_V1_5	1	19	female	2	38	d	C2_123_DV_223.bmp	s	1296
SG_MatchingHamood_14_V1_5	1	19	female	2	39	d	C2_095_DV_229.bmp	s	1337
SG_MatchingHamood_14_V1_5	1	19	female	2	40	s	C2_080_DV_080.bmp	s	3896
SG_MatchingHamood_14_V1_5	1	19	female	3	1	d	DV_013_C2_235.bmp	d	8609
SG_MatchingHamood_14_V1_5	1	19	female	3	2	d	C2_003_DV_018.bmp	d	966
SG_MatchingHamood_14_V1_5	1	19	female	3	3	d	C2_232_DV_048.bmp	s	2557
SG_MatchingHamood_14_V1_5	1	19	female	3	4	d	C2_249_DV_083.bmp	d	2763
SG_MatchingHamood_14_V1_5	1	19	female	3	5	s	DV_118_C2_118.bmp	s	10089
SG_MatchingHamood_14_V1_5	1	19	female	3	6	d	DV_020_C2_090.bmp	s	993
SG_MatchingHamood_14_V1_5	1	19	female	3	7	d	C2_240_DV_044.bmp	s	1519
SG_MatchingHamood_14_V1_5	1	19	female	3	8	s	C2_144_DV_144.bmp	s	15086
SG_MatchingHamood_14_V1_5	1	19	female	3	9	s	DV_141_C2_141.bmp	s	5816
SG_MatchingHamood_14_V1_5	1	19	female	3	10	d	C2_242_DV_246.bmp	s	6653
SG_MatchingHamood_14_V1_5	1	19	female	3	11	s	DV_127_C2_127.bmp	s	713
SG_MatchingHamood_14_V1_5	1	19	female	3	12	d	C2_223_DV_242.bmp	s	1041
SG_MatchingHamood_14_V1_5	1	19	female	3	13	d	C2_246_DV_160.bmp	d	771
SG_MatchingHamood_14_V1_5	1	19	female	3	14	s	C2_146_DV_146.bmp	s	521
SG_MatchingHamood_14_V1_5	1	19	female	3	15	s	C2_131_DV_131.bmp	s	513
SG_MatchingHamood_14_V1_5	1	19	female	3	16	s	DV_137_C2_137.bmp	s	480
SG_MatchingHamood_14_V1_5	1	19	female	3	17	s	DV_147_C2_147.bmp	s	738
SG_MatchingHamood_14_V1_5	1	19	female	3	18	s	C2_113_DV_113.bmp	s	784
SG_MatchingHamood_14_V1_5	1	19	female	3	19	d	DV_009_C2_180.bmp	s	1101
SG_MatchingHamood_14_V1_5	1	19	female	3	20	s	C2_152_DV_152.bmp	s	832
SG_MatchingHamood_14_V1_5	1	19	female	3	21	s	C2_142_DV_142.bmp	s	804
SG_MatchingHamood_14_V1_5	1	19	female	3	22	d	C2_289_DV_039.bmp	s	801
SG_MatchingHamood_14_V1_5	1	19	female	3	23	d	DV_024_C2_085.bmp	d	708
SG_MatchingHamood_14_V1_5	1	19	female	3	24	d	C2_252_DV_125.bmp	s	1079
SG_MatchingHamood_14_V1_5	1	19	female	3	25	s	C2_140_DV_140.bmp	s	928
SG_MatchingHamood_14_V1_5	1	19	female	3	26	d	DV_012_C2_205.bmp	d	1399
SG_MatchingHamood_14_V1_5	1	19	female	3	27	d	C2_261_DV_287.bmp	d	1442
SG_MatchingHamood_14_V1_5	1	19	female	3	28	d	DV_032_C2_153.bmp	s	975
SG_MatchingHamood_14_V1_5	1	19	female	3	29	s	C2_124_DV_124.bmp	s	1095
SG_MatchingHamood_14_V1_5	1	19	female	3	30	d	C2_266_DV_227.bmp	d	1573
SG_MatchingHamood_14_V1_5	1	19	female	3	31	s	C2_115_DV_115.bmp	s	1045
SG_MatchingHamood_14_V1_5	1	19	female	3	32	s	C2_134_DV_134.bmp	s	2039
SG_MatchingHamood_14_V1_5	1	19	female	3	33	s	C2_112_DV_112.bmp	s	3762
SG_MatchingHamood_14_V1_5	1	19	female	3	34	s	C2_119_DV_119.bmp	d	1000
SG_MatchingHamood_14_V1_5	1	19	female	3	35	s	C2_105_DV_105.bmp	s	806
SG_MatchingHamood_14_V1_5	1	19	female	3	36	d	C2_304_DV_099.bmp	s	2626
SG_MatchingHamood_14_V1_5	1	19	female	3	37	d	DV_037_C2_303.bmp	s	1068
SG_MatchingHamood_14_V1_5	1	19	female	3	38	s	C2_116_DV_116.bmp	s	904
SG_MatchingHamood_14_V1_5	1	19	female	3	39	s	DV_111_C2_111.bmp	d	912
SG_MatchingHamood_14_V1_5	1	19	female	3	40	d	C2_239_DV_114.bmp	s	840
SG_MatchingHamood_14_V1_5	1	19	female	4	1	d	DV_074_C2_075.bmp	s	779
SG_MatchingHamood_14_V1_5	1	19	female	4	2	s	C2_247_DV_247.bmp	s	776
SG_MatchingHamood_14_V1_5	1	19	female	4	3	s	C2_181_Dv_181.bmp	s	677
SG_MatchingHamood_14_V1_5	1	19	female	4	4	s	C2_207_DV_207.bmp	s	743
SG_MatchingHamood_14_V1_5	1	19	female	4	5	d	DV_120_C2_133.bmp	d	1303
SG_MatchingHamood_14_V1_5	1	19	female	4	6	d	DV_045_C2_027.bmp	d	1032
SG_MatchingHamood_14_V1_5	1	19	female	4	7	s	C2_194_DV_194.bmp	s	925
SG_MatchingHamood_14_V1_5	1	19	female	4	8	s	C2_243_DV_243.bmp	d	1099
SG_MatchingHamood_14_V1_5	1	19	female	4	9	s	DV_166_C2_166.bmp	s	755
SG_MatchingHamood_14_V1_5	1	19	female	4	10	d	DV_048_C2_175.bmp	d	993
SG_MatchingHamood_14_V1_5	1	19	female	4	11	d	DV_039_C2_296.bmp	d	807
SG_MatchingHamood_14_V1_5	1	19	female	4	12	d	DV_126_C2_076.bmp	d	1005
SG_MatchingHamood_14_V1_5	1	19	female	4	13	s	DV_231_C2_231.bmp	s	935
SG_MatchingHamood_14_V1_5	1	19	female	4	14	s	DV_248_C2_248.bmp	s	975
SG_MatchingHamood_14_V1_5	1	19	female	4	15	d	DV_088_C2_295.bmp	d	1310
SG_MatchingHamood_14_V1_5	1	19	female	4	16	d	DV_129_C2_199.bmp	d	790
SG_MatchingHamood_14_V1_5	1	19	female	4	17	s	C2_172_DV_172.bmp	s	1979
SG_MatchingHamood_14_V1_5	1	19	female	4	18	d	DV_091_C2_211.bmp	s	1066
SG_MatchingHamood_14_V1_5	1	19	female	4	19	s	C2_158_DV_158.bmp	s	867
SG_MatchingHamood_14_V1_5	1	19	female	4	20	d	DV_132_C2_210.bmp	s	1061
SG_MatchingHamood_14_V1_5	1	19	female	4	21	d	DV_052_C2_264.bmp	s	2646
SG_MatchingHamood_14_V1_5	1	19	female	4	22	d	DV_081_C2_282.bmp	s	3379
SG_MatchingHamood_14_V1_5	1	19	female	4	23	s	C2_226_DV_226.bmp	s	3921
SG_MatchingHamood_14_V1_5	1	19	female	4	24	d	DV_178_C2_060.bmp	s	1079
SG_MatchingHamood_14_V1_5	1	19	female	4	25	d	DV_053_C2_208.bmp	s	971
SG_MatchingHamood_14_V1_5	1	19	female	4	26	d	DV_130_C2_253.bmp	s	1225
SG_MatchingHamood_14_V1_5	1	19	female	4	27	s	DV_200_C2_200.bmp	s	1285
SG_MatchingHamood_14_V1_5	1	19	female	4	28	s	C2_155_DV_155.bmp	s	1999
SG_MatchingHamood_14_V1_5	1	19	female	4	29	d	DV_094_C2_022.bmp	d	2939
SG_MatchingHamood_14_V1_5	1	19	female	4	30	s	DV_190_C2_190.bmp	s	3898
SG_MatchingHamood_14_V1_5	1	19	female	4	31	s	DV_204_C2_204.bmp	s	971
SG_MatchingHamood_14_V1_5	1	19	female	4	32	s	DV_222_C2_222.bmp	d	776
SG_MatchingHamood_14_V1_5	1	19	female	4	33	s	C2_157_DV_157.bmp	s	903
SG_MatchingHamood_14_V1_5	1	19	female	4	34	d	DV_109_C2_268.bmp	d	799
SG_MatchingHamood_14_V1_5	1	19	female	4	35	d	DV_114_C2_126.bmp	d	683
SG_MatchingHamood_14_V1_5	1	19	female	4	36	d	DV_160_C2_154.bmp	d	1470
SG_MatchingHamood_14_V1_5	1	19	female	4	37	s	DV_161_C2_161.bmp	d	992
SG_MatchingHamood_14_V1_5	1	19	female	4	38	s	DV_167_C2_167.bmp	s	550
SG_MatchingHamood_14_V1_5	1	19	female	4	39	d	DV_108_C2_038.bmp	s	668
SG_MatchingHamood_14_V1_5	1	19	female	4	40	s	DV_214_C2_214.bmp	d	1559
SG_MatchingHamood_14_V1_5	1	19	female	5	1	s	C2_260_DV_260.bmp	s	645
SG_MatchingHamood_14_V1_5	1	19	female	5	2	s	DV_265_C2_265.bmp	s	1112
SG_MatchingHamood_14_V1_5	1	19	female	5	3	d	DV_295_C2_216.bmp	s	2134
SG_MatchingHamood_14_V1_5	1	19	female	5	4	s	C2_288_DV_288.bmp	s	781
SG_MatchingHamood_14_V1_5	1	19	female	5	5	s	C2_302_DV_302.bmp	s	724
SG_MatchingHamood_14_V1_5	1	19	female	5	6	s	DV_300_C2_300.bmp	s	869
SG_MatchingHamood_14_V1_5	1	19	female	5	7	s	C2_291_DV_291.bmp	s	613
SG_MatchingHamood_14_V1_5	1	19	female	5	8	s	DV_286_C2_286.bmp	s	859
SG_MatchingHamood_14_V1_5	1	19	female	5	9	d	DV_203_C2_277.bmp	d	948
SG_MatchingHamood_14_V1_5	1	19	female	5	10	d	DV_132_C2_168.bmp	d	891
SG_MatchingHamood_14_V1_5	1	19	female	5	11	d	DV_133_C2_139.bmp	s	2356
SG_MatchingHamood_14_V1_5	1	19	female	5	12	s	C2_257_DV_257.bmp	s	1283
SG_MatchingHamood_14_V1_5	1	19	female	5	13	d	DV_170_C2_270.bmp	s	852
SG_MatchingHamood_14_V1_5	1	19	female	5	14	d	DV_254_C2_287.bmp	d	1504
SG_MatchingHamood_14_V1_5	1	19	female	5	15	s	C2_256_DV_256.bmp	s	1398
SG_MatchingHamood_14_V1_5	1	19	female	5	16	s	C2_258_DV_258.bmp	s	1913
SG_MatchingHamood_14_V1_5	1	19	female	5	17	d	DV_280_C2_003.bmp	d	1889
SG_MatchingHamood_14_V1_5	1	19	female	5	18	d	DV_208_C2_183.bmp	d	3979
SG_MatchingHamood_14_V1_5	1	19	female	5	19	s	C2_294_DV_294.bmp	s	1152
SG_MatchingHamood_14_V1_5	1	19	female	5	20	d	DV_244_C2_042.bmp	d	4535
SG_MatchingHamood_14_V1_5	1	19	female	5	21	d	DV_277_C2_110.bmp	d	2662
SG_MatchingHamood_14_V1_5	1	19	female	5	22	d	DV_199_C2_125.bmp	s	2280
SG_MatchingHamood_14_V1_5	1	19	female	5	23	s	C2_271_DV_271.bmp	s	2129
SG_MatchingHamood_14_V1_5	1	19	female	5	24	d	DV_238_C2_218.bmp	d	1159
SG_MatchingHamood_14_V1_5	1	19	female	5	25	s	DV_298_C2_298.bmp	d	4134
SG_MatchingHamood_14_V1_5	1	19	female	5	26	s	DV_274_C2_274.bmp	s	2589
SG_MatchingHamood_14_V1_5	1	19	female	5	27	d	DV_178_C2_099.bmp	s	6275
SG_MatchingHamood_14_V1_5	1	19	female	5	28	s	DV_259_C2_259.bmp	s	2708
SG_MatchingHamood_14_V1_5	1	19	female	5	29	d	DV_219_C2_135.bmp	d	1948
SG_MatchingHamood_14_V1_5	1	19	female	5	30	d	C2_008_DV_039.bmp	s	6641
SG_MatchingHamood_14_V1_5	1	19	female	5	31	s	DV_284_C2_284.bmp	s	1257
SG_MatchingHamood_14_V1_5	1	19	female	5	32	s	C2_278_DV_278.bmp	s	1602
SG_MatchingHamood_14_V1_5	1	19	female	5	33	s	C2_290_DV_290.bmp	s	2510
SG_MatchingHamood_14_V1_5	1	19	female	5	34	d	C2_083_DV_108.bmp	d	1048
SG_MatchingHamood_14_V1_5	1	19	female	5	35	d	DV_217_C2_185.bmp	s	1435
SG_MatchingHamood_14_V1_5	1	19	female	5	36	d	DV_296_C2_235.bmp	s	1390
SG_MatchingHamood_14_V1_5	1	19	female	5	37	s	DV_299_C2_299.bmp	s	899
SG_MatchingHamood_14_V1_5	1	19	female	5	38	d	DV_237_C2_297.bmp	d	1733
SG_MatchingHamood_14_V1_5	1	19	female	5	39	s	DV_267_C2_267.bmp	s	1003
SG_MatchingHamood_14_V1_5	1	19	female	5	40	d	DV_154_C2_042.bmp	d	2783
SG_MatchingHamood_14_V1_1	2	19	female	1	1	s	C2_061_DV_061.bmp	s	2016
SG_MatchingHamood_14_V1_1	2	19	female	1	2	s	C2_005_DV_005.bmp	s	1558
SG_MatchingHamood_14_V1_1	2	19	female	1	3	s	C2_036_DV_036.bmp	s	1566
SG_MatchingHamood_14_V1_1	2	19	female	1	4	d	C2_007_DV_097.bmp	d	1901
SG_MatchingHamood_14_V1_1	2	19	female	1	5	s	C2_016_DV_016.bmp	s	2080
SG_MatchingHamood_14_V1_1	2	19	female	1	6	d	C2_050_DV_215.bmp	d	2131
SG_MatchingHamood_14_V1_1	2	19	female	1	7	d	C2_012_DV_205.bmp	d	4669
SG_MatchingHamood_14_V1_1	2	19	female	1	8	d	C2_004_DV_293.bmp	d	2377
SG_MatchingHamood_14_V1_1	2	19	female	1	9	s	DV_062_C2_062.bmp	s	1336
SG_MatchingHamood_14_V1_1	2	19	female	1	10	s	C2_043_DV_043.bmp	s	1497
SG_MatchingHamood_14_V1_1	2	19	female	1	11	d	C2_039_DV_072.bmp	d	5700
SG_MatchingHamood_14_V1_1	2	19	female	1	12	s	C2_040_DV_040.bmp	s	1527
SG_MatchingHamood_14_V1_1	2	19	female	1	13	d	C2_041_DV_044.bmp	d	7791
SG_MatchingHamood_14_V1_1	2	19	female	1	14	d	C2_033_DV_180.bmp	d	1558
SG_MatchingHamood_14_V1_1	2	19	female	1	15	s	C2_035_DV_035.bmp	s	1182
SG_MatchingHamood_14_V1_1	2	19	female	1	16	s	C2_017_DV_017.bmp	s	4094
SG_MatchingHamood_14_V1_1	2	19	female	1	17	s	DV_046_C2_046.bmp	d	2600
SG_MatchingHamood_14_V1_1	2	19	female	1	18	s	C2_054_DV_054.bmp	s	11887
SG_MatchingHamood_14_V1_1	2	19	female	1	19	d	C2_261_DV_201.bmp	d	4003
SG_MatchingHamood_14_V1_1	2	19	female	1	20	s	C2_028_DV_028.bmp	s	5202
SG_MatchingHamood_14_V1_1	2	19	female	1	21	s	C2_025_DV_025.bmp	s	7511
SG_MatchingHamood_14_V1_1	2	19	female	1	22	d	C2_038_DV_081.bmp	d	2626
SG_MatchingHamood_14_V1_1	2	19	female	1	23	s	C2_034_DV_034.bmp	s	2239
SG_MatchingHamood_14_V1_1	2	19	female	1	24	d	C2_018_DV_019.bmp	d	2133
SG_MatchingHamood_14_V1_1	2	19	female	1	25	d	C2_037_DV_085.bmp	d	12814
SG_MatchingHamood_14_V1_1	2	19	female	1	26	d	C2_051_DV_238.bmp	d	3596
SG_MatchingHamood_14_V1_1	2	19	female	1	27	d	C2_024_DV_030.bmp	d	3059
SG_MatchingHamood_14_V1_1	2	19	female	1	28	s	DV_015_C2_015.bmp	s	1631
SG_MatchingHamood_14_V1_1	2	19	female	1	29	s	C2_031_DV_031.bmp	s	1891
SG_MatchingHamood_14_V1_1	2	19	female	1	30	d	C2_011_DV_049.bmp	s	5934
SG_MatchingHamood_14_V1_1	2	19	female	1	31	s	DV_029_C2_029.bmp	s	2184
SG_MatchingHamood_14_V1_1	2	19	female	1	32	d	C2_023_DV_304.bmp	s	3487
SG_MatchingHamood_14_V1_1	2	19	female	1	33	d	C2_010_DV_303.bmp	s	8442
SG_MatchingHamood_14_V1_1	2	19	female	1	34	d	DV_129_C2_092.bmp	s	3223
SG_MatchingHamood_14_V1_1	2	19	female	1	35	s	C2_007_DV_007.bmp	s	3478
SG_MatchingHamood_14_V1_1	2	19	female	1	36	s	C2_056_DV_056.bmp	s	1713
SG_MatchingHamood_14_V1_1	2	19	female	1	37	s	C2_014_DV_014.bmp	s	7170
SG_MatchingHamood_14_V1_1	2	19	female	1	38	d	C2_021_DV_087.bmp	d	9802
SG_MatchingHamood_14_V1_1	2	19	female	1	39	d	DV_303_C2_217.bmp	s	5817
SG_MatchingHamood_14_V1_1	2	19	female	1	40	d	C2_009_DV_033.bmp	s	3863
SG_MatchingHamood_14_V1_1	2	19	female	2	1	d	C2_002_DV_041.bmp	s	2179
SG_MatchingHamood_14_V1_1	2	19	female	2	2	s	DV_064_C2_064.bmp	s	2715
SG_MatchingHamood_14_V1_1	2	19	female	2	3	s	C2_069_DV_069.bmp	s	4220
SG_MatchingHamood_14_V1_1	2	19	female	2	4	d	C2_143_DV_254.bmp	s	5026
SG_MatchingHamood_14_V1_1	2	19	female	2	5	d	C2_091_DV_283.bmp	s	6215
SG_MatchingHamood_14_V1_1	2	19	female	2	6	s	DV_100_C2_100.bmp	s	2821
SG_MatchingHamood_14_V1_1	2	19	female	2	7	s	DV_104_C2_104.bmp	s	7700
SG_MatchingHamood_14_V1_1	2	19	female	2	8	s	DV_103_C2_103.bmp	s	2983
SG_MatchingHamood_14_V1_1	2	19	female	2	9	d	C2_095_DV_229.bmp	s	3878
SG_MatchingHamood_14_V1_1	2	19	female	2	10	s	C2_082_DV_082.bmp	s	1720
SG_MatchingHamood_14_V1_1	2	19	female	2	11	s	C2_068_DV_068.bmp	s	1722
SG_MatchingHamood_14_V1_1	2	19	female	2	12	d	C2_076_DV_051.bmp	d	2500
SG_MatchingHamood_14_V1_1	2	19	female	2	13	s	C2_101_DV_101.bmp	s	3839
SG_MatchingHamood_14_V1_1	2	19	female	2	14	s	C2_065_DV_065.bmp	s	3557
SG_MatchingHamood_14_V1_1	2	19	female	2	15	d	C2_211_DV_128.bmp	d	4885
SG_MatchingHamood_14_V1_1	2	19	female	2	16	s	DV_089_C2_089.bmp	s	6649
SG_MatchingHamood_14_V1_1	2	19	female	2	17	d	C2_098_DV_024.bmp	d	3454
SG_MatchingHamood_14_V1_1	2	19	female	2	18	s	C2_073_DV_073.bmp	s	1498
SG_MatchingHamood_14_V1_1	2	19	female	2	19	d	C2_174_DV_183.bmp	s	4020
SG_MatchingHamood_14_V1_1	2	19	female	2	20	d	C2_123_DV_223.bmp	s	5058
SG_MatchingHamood_14_V1_1	2	19	female	2	21	d	C2_206_DV_077.bmp	d	2671
SG_MatchingHamood_14_V1_1	2	19	female	2	22	d	C2_070_DV_012.bmp	d	3195
SG_MatchingHamood_14_V1_1	2	19	female	2	23	d	C2_057_DV_067.bmp	d	2145
SG_MatchingHamood_14_V1_1	2	19	female	2	24	s	C2_066_DV_066.bmp	s	4450
SG_MatchingHamood_14_V1_1	2	19	female	2	25	d	C2_108_DV_282.bmp	d	6647
SG_MatchingHamood_14_V1_1	2	19	female	2	26	d	C2_218_DV_109.bmp	d	8235
SG_MatchingHamood_14_V1_1	2	19	female	2	27	d	C2_055_DV_059.bmp	s	8176
SG_MatchingHamood_14_V1_1	2	19	female	2	28	d	C2_117_DV_219.bmp	d	4320
SG_MatchingHamood_14_V1_1	2	19	female	2	29	s	C2_078_DV_078.bmp	s	1778
SG_MatchingHamood_14_V1_1	2	19	female	2	30	s	C2_071_DV_071.bmp	s	2986
SG_MatchingHamood_14_V1_1	2	19	female	2	31	s	C2_063_DV_063.bmp	s	1521
SG_MatchingHamood_14_V1_1	2	19	female	2	32	s	C2_080_DV_080.bmp	s	3475
SG_MatchingHamood_14_V1_1	2	19	female	2	33	d	C2_092_DV_227.bmp	d	4814
SG_MatchingHamood_14_V1_1	2	19	female	2	34	s	C2_102_DV_102.bmp	s	1477
SG_MatchingHamood_14_V1_1	2	19	female	2	35	d	C2_171_DV_185.bmp	d	3304
SG_MatchingHamood_14_V1_1	2	19	female	2	36	s	C2_084_DV_084.bmp	s	1834
SG_MatchingHamood_14_V1_1	2	19	female	2	37	d	C2_182_DV_184.bmp	d	3935
SG_MatchingHamood_14_V1_1	2	19	female	2	38	s	C2_079_DV_079.bmp	s	4337
SG_MatchingHamood_14_V1_1	2	19	female	2	39	d	C2_139_DV_120.bmp	d	2770
SG_MatchingHamood_14_V1_1	2	19	female	2	40	s	DV_086_C2_086.bmp	s	1562
SG_MatchingHamood_14_V1_1	2	19	female	3	1	d	C2_249_DV_083.bmp	d	5546
SG_MatchingHamood_14_V1_1	2	19	female	3	2	s	C2_124_DV_124.bmp	s	2923
SG_MatchingHamood_14_V1_1	2	19	female	3	3	s	C2_105_DV_105.bmp	s	5172
SG_MatchingHamood_14_V1_1	2	19	female	3	4	d	C2_252_DV_125.bmp	d	8884
SG_MatchingHamood_14_V1_1	2	19	female	3	5	d	C2_261_DV_287.bmp	d	5688
SG_MatchingHamood_14_V1_1	2	19	female	3	6	s	C2_115_DV_115.bmp	s	4259
SG_MatchingHamood_14_V1_1	2	19	female	3	7	s	DV_137_C2_137.bmp	s	1407
SG_MatchingHamood_14_V1_1	2	19	female	3	8	s	C2_152_DV_152.bmp	s	4670
SG_MatchingHamood_14_V1_1	2	19	female	3	9	s	DV_127_C2_127.bmp	s	1537
SG_MatchingHamood_14_V1_1	2	19	female	3	10	d	DV_032_C2_153.bmp	d	5258
SG_MatchingHamood_14_V1_1	2	19	female	3	11	s	C2_142_DV_142.bmp	s	6911
SG_MatchingHamood_14_V1_1	2	19	female	3	12	s	DV_118_C2_118.bmp	s	7480
SG_MatchingHamood_14_V1_1	2	19	female	3	13	d	C2_223_DV_242.bmp	d	9164
SG_MatchingHamood_14_V1_1	2	19	female	3	14	s	C2_134_DV_134.bmp	s	1236
SG_MatchingHamood_14_V1_1	2	19	female	3	15	s	C2_116_DV_116.bmp	s	4489
SG_MatchingHamood_14_V1_1	2	19	female	3	16	d	DV_037_C2_303.bmp	s	2941
SG_MatchingHamood_14_V1_1	2	19	female	3	17	s	C2_131_DV_131.bmp	s	2853
SG_MatchingHamood_14_V1_1	2	19	female	3	18	d	C2_003_DV_018.bmp	d	6929
SG_MatchingHamood_14_V1_1	2	19	female	3	19	d	C2_266_DV_227.bmp	s	11907
SG_MatchingHamood_14_V1_1	2	19	female	3	20	d	C2_239_DV_114.bmp	s	3662
SG_MatchingHamood_14_V1_1	2	19	female	3	21	s	C2_140_DV_140.bmp	s	6474
SG_MatchingHamood_14_V1_1	2	19	female	3	22	d	C2_289_DV_039.bmp	d	6101
SG_MatchingHamood_14_V1_1	2	19	female	3	23	d	C2_304_DV_099.bmp	d	8504
SG_MatchingHamood_14_V1_1	2	19	female	3	24	d	C2_242_DV_246.bmp	d	4891
SG_MatchingHamood_14_V1_1	2	19	female	3	25	d	DV_024_C2_085.bmp	d	5286
SG_MatchingHamood_14_V1_1	2	19	female	3	26	s	C2_119_DV_119.bmp	s	16113
SG_MatchingHamood_14_V1_1	2	19	female	3	27	d	DV_012_C2_205.bmp	d	1714
SG_MatchingHamood_14_V1_1	2	19	female	3	28	d	C2_246_DV_160.bmp	d	4124
SG_MatchingHamood_14_V1_1	2	19	female	3	29	d	DV_009_C2_180.bmp	d	3214
SG_MatchingHamood_14_V1_1	2	19	female	3	30	s	DV_111_C2_111.bmp	s	1972
SG_MatchingHamood_14_V1_1	2	19	female	3	31	d	DV_013_C2_235.bmp	d	5204
SG_MatchingHamood_14_V1_1	2	19	female	3	32	s	C2_144_DV_144.bmp	s	2243
SG_MatchingHamood_14_V1_1	2	19	female	3	33	s	C2_112_DV_112.bmp	s	4752
SG_MatchingHamood_14_V1_1	2	19	female	3	34	s	DV_147_C2_147.bmp	s	2465
SG_MatchingHamood_14_V1_1	2	19	female	3	35	d	C2_240_DV_044.bmp	d	7189
SG_MatchingHamood_14_V1_1	2	19	female	3	36	d	DV_020_C2_090.bmp	s	4451
SG_MatchingHamood_14_V1_1	2	19	female	3	37	s	DV_141_C2_141.bmp	d	2816
SG_MatchingHamood_14_V1_1	2	19	female	3	38	s	C2_146_DV_146.bmp	s	2390
SG_MatchingHamood_14_V1_1	2	19	female	3	39	d	C2_232_DV_048.bmp	d	7126
SG_MatchingHamood_14_V1_1	2	19	female	3	40	s	C2_113_DV_113.bmp	s	2167
SG_MatchingHamood_14_V1_1	2	19	female	4	1	d	DV_178_C2_060.bmp	d	6743
SG_MatchingHamood_14_V1_1	2	19	female	4	2	s	C2_226_DV_226.bmp	s	2360
SG_MatchingHamood_14_V1_1	2	19	female	4	3	d	DV_109_C2_268.bmp	d	1632
SG_MatchingHamood_14_V1_1	2	19	female	4	4	s	DV_231_C2_231.bmp	s	5948
SG_MatchingHamood_14_V1_1	2	19	female	4	5	d	DV_120_C2_133.bmp	s	2861
SG_MatchingHamood_14_V1_1	2	19	female	4	6	d	DV_091_C2_211.bmp	d	3137
SG_MatchingHamood_14_V1_1	2	19	female	4	7	d	DV_130_C2_253.bmp	d	8483
SG_MatchingHamood_14_V1_1	2	19	female	4	8	s	C2_247_DV_247.bmp	s	1566
SG_MatchingHamood_14_V1_1	2	19	female	4	9	s	C2_172_DV_172.bmp	s	4974
SG_MatchingHamood_14_V1_1	2	19	female	4	10	s	DV_204_C2_204.bmp	s	15757
SG_MatchingHamood_14_V1_1	2	19	female	4	11	d	DV_108_C2_038.bmp	s	4125
SG_MatchingHamood_14_V1_1	2	19	female	4	12	d	DV_081_C2_282.bmp	d	4015
SG_MatchingHamood_14_V1_1	2	19	female	4	13	s	C2_157_DV_157.bmp	s	1005
SG_MatchingHamood_14_V1_1	2	19	female	4	14	s	DV_190_C2_190.bmp	s	1011
SG_MatchingHamood_14_V1_1	2	19	female	4	15	d	DV_088_C2_295.bmp	d	1210
SG_MatchingHamood_14_V1_1	2	19	female	4	16	d	DV_126_C2_076.bmp	d	2624
SG_MatchingHamood_14_V1_1	2	19	female	4	17	s	DV_248_C2_248.bmp	s	1558
SG_MatchingHamood_14_V1_1	2	19	female	4	18	s	DV_200_C2_200.bmp	s	1750
SG_MatchingHamood_14_V1_1	2	19	female	4	19	s	DV_161_C2_161.bmp	d	3678
SG_MatchingHamood_14_V1_1	2	19	female	4	20	d	DV_052_C2_264.bmp	s	3185
SG_MatchingHamood_14_V1_1	2	19	female	4	21	d	DV_094_C2_022.bmp	d	2216
SG_MatchingHamood_14_V1_1	2	19	female	4	22	s	C2_181_Dv_181.bmp	s	10694
SG_MatchingHamood_14_V1_1	2	19	female	4	23	d	DV_074_C2_075.bmp	s	6225
SG_MatchingHamood_14_V1_1	2	19	female	4	24	s	DV_214_C2_214.bmp	s	1399
SG_MatchingHamood_14_V1_1	2	19	female	4	25	s	C2_243_DV_243.bmp	s	1654
SG_MatchingHamood_14_V1_1	2	19	female	4	26	s	C2_155_DV_155.bmp	s	5569
SG_MatchingHamood_14_V1_1	2	19	female	4	27	s	DV_167_C2_167.bmp	s	1843
SG_MatchingHamood_14_V1_1	2	19	female	4	28	d	DV_114_C2_126.bmp	s	7422
SG_MatchingHamood_14_V1_1	2	19	female	4	29	d	DV_132_C2_210.bmp	s	7444
SG_MatchingHamood_14_V1_1	2	19	female	4	30	s	C2_207_DV_207.bmp	s	1721
SG_MatchingHamood_14_V1_1	2	19	female	4	31	s	C2_158_DV_158.bmp	s	1363
SG_MatchingHamood_14_V1_1	2	19	female	4	32	d	DV_129_C2_199.bmp	d	2483
SG_MatchingHamood_14_V1_1	2	19	female	4	33	s	DV_222_C2_222.bmp	s	4751
SG_MatchingHamood_14_V1_1	2	19	female	4	34	s	C2_194_DV_194.bmp	s	1910
SG_MatchingHamood_14_V1_1	2	19	female	4	35	s	DV_166_C2_166.bmp	s	1801
SG_MatchingHamood_14_V1_1	2	19	female	4	36	d	DV_053_C2_208.bmp	d	3415
SG_MatchingHamood_14_V1_1	2	19	female	4	37	d	DV_039_C2_296.bmp	d	5334
SG_MatchingHamood_14_V1_1	2	19	female	4	38	d	DV_160_C2_154.bmp	s	4727
SG_MatchingHamood_14_V1_1	2	19	female	4	39	d	DV_048_C2_175.bmp	s	2297
SG_MatchingHamood_14_V1_1	2	19	female	4	40	d	DV_045_C2_027.bmp	s	3043
SG_MatchingHamood_14_V1_1	2	19	female	5	1	s	DV_274_C2_274.bmp	s	2488
SG_MatchingHamood_14_V1_1	2	19	female	5	2	s	DV_259_C2_259.bmp	s	4883
SG_MatchingHamood_14_V1_1	2	19	female	5	3	s	C2_256_DV_256.bmp	s	2182
SG_MatchingHamood_14_V1_1	2	19	female	5	4	d	DV_280_C2_003.bmp	s	4381
SG_MatchingHamood_14_V1_1	2	19	female	5	5	d	DV_244_C2_042.bmp	d	2397
SG_MatchingHamood_14_V1_1	2	19	female	5	6	s	DV_284_C2_284.bmp	s	1427
SG_MatchingHamood_14_V1_1	2	19	female	5	7	d	DV_199_C2_125.bmp	s	1905
SG_MatchingHamood_14_V1_1	2	19	female	5	8	s	DV_300_C2_300.bmp	s	1220
SG_MatchingHamood_14_V1_1	2	19	female	5	9	s	C2_278_DV_278.bmp	s	2234
SG_MatchingHamood_14_V1_1	2	19	female	5	10	d	DV_219_C2_135.bmp	d	6327
SG_MatchingHamood_14_V1_1	2	19	female	5	11	d	DV_203_C2_277.bmp	s	2761
SG_MatchingHamood_14_V1_1	2	19	female	5	12	s	C2_258_DV_258.bmp	s	1585
SG_MatchingHamood_14_V1_1	2	19	female	5	13	d	DV_295_C2_216.bmp	d	2384
SG_MatchingHamood_14_V1_1	2	19	female	5	14	d	DV_178_C2_099.bmp	s	5567
SG_MatchingHamood_14_V1_1	2	19	female	5	15	s	DV_267_C2_267.bmp	s	1815
SG_MatchingHamood_14_V1_1	2	19	female	5	16	d	C2_008_DV_039.bmp	s	2149
SG_MatchingHamood_14_V1_1	2	19	female	5	17	d	DV_217_C2_185.bmp	s	7733
SG_MatchingHamood_14_V1_1	2	19	female	5	18	d	DV_208_C2_183.bmp	d	2183
SG_MatchingHamood_14_V1_1	2	19	female	5	19	d	DV_277_C2_110.bmp	s	4990
SG_MatchingHamood_14_V1_1	2	19	female	5	20	s	C2_288_DV_288.bmp	s	1422
SG_MatchingHamood_14_V1_1	2	19	female	5	21	d	DV_238_C2_218.bmp	d	10060
SG_MatchingHamood_14_V1_1	2	19	female	5	22	s	C2_271_DV_271.bmp	s	1447
SG_MatchingHamood_14_V1_1	2	19	female	5	23	s	C2_260_DV_260.bmp	s	1876
SG_MatchingHamood_14_V1_1	2	19	female	5	24	s	C2_257_DV_257.bmp	s	1599
SG_MatchingHamood_14_V1_1	2	19	female	5	25	d	DV_133_C2_139.bmp	s	3030
SG_MatchingHamood_14_V1_1	2	19	female	5	26	s	C2_291_DV_291.bmp	s	4195
SG_MatchingHamood_14_V1_1	2	19	female	5	27	s	DV_265_C2_265.bmp	s	3266
SG_MatchingHamood_14_V1_1	2	19	female	5	28	s	C2_294_DV_294.bmp	s	2078
SG_MatchingHamood_14_V1_1	2	19	female	5	29	d	C2_083_DV_108.bmp	d	6586
SG_MatchingHamood_14_V1_1	2	19	female	5	30	d	DV_237_C2_297.bmp	d	4129
SG_MatchingHamood_14_V1_1	2	19	female	5	31	s	C2_290_DV_290.bmp	s	8562
SG_MatchingHamood_14_V1_1	2	19	female	5	32	s	DV_286_C2_286.bmp	s	3554
SG_MatchingHamood_14_V1_1	2	19	female	5	33	d	DV_132_C2_168.bmp	s	7555
SG_MatchingHamood_14_V1_1	2	19	female	5	34	s	DV_298_C2_298.bmp	s	2580
SG_MatchingHamood_14_V1_1	2	19	female	5	35	d	DV_154_C2_042.bmp	d	3131
SG_MatchingHamood_14_V1_1	2	19	female	5	36	s	C2_302_DV_302.bmp	d	2692
SG_MatchingHamood_14_V1_1	2	19	female	5	37	d	DV_170_C2_270.bmp	d	7799
SG_MatchingHamood_14_V1_1	2	19	female	5	38	d	DV_296_C2_235.bmp	d	7813
SG_MatchingHamood_14_V1_1	2	19	female	5	39	d	DV_254_C2_287.bmp	s	1291
SG_MatchingHamood_14_V1_1	2	19	female	5	40	s	DV_299_C2_299.bmp	s	9566
SG_MatchingHamood_14_V1_2	2	19	female	1	1	d	DV_129_C2_092.bmp	s	6216
SG_MatchingHamood_14_V1_2	2	19	female	1	2	s	C2_034_DV_034.bmp	s	1430
SG_MatchingHamood_14_V1_2	2	19	female	1	3	s	C2_036_DV_036.bmp	s	1227
SG_MatchingHamood_14_V1_2	2	19	female	1	4	d	C2_038_DV_081.bmp	d	4447
SG_MatchingHamood_14_V1_2	2	19	female	1	5	s	DV_015_C2_015.bmp	s	1596
SG_MatchingHamood_14_V1_2	2	19	female	1	6	s	C2_016_DV_016.bmp	s	1465
SG_MatchingHamood_14_V1_2	2	19	female	1	7	d	C2_051_DV_238.bmp	d	3100
SG_MatchingHamood_14_V1_2	2	19	female	1	8	s	C2_007_DV_007.bmp	s	4672
SG_MatchingHamood_14_V1_2	2	19	female	1	9	d	C2_039_DV_072.bmp	s	18075
SG_MatchingHamood_14_V1_2	2	19	female	1	10	d	DV_303_C2_217.bmp	s	2612
SG_MatchingHamood_14_V1_2	2	19	female	1	11	s	C2_043_DV_043.bmp	s	1640
SG_MatchingHamood_14_V1_2	2	19	female	1	12	s	DV_046_C2_046.bmp	s	1190
SG_MatchingHamood_14_V1_2	2	19	female	1	13	s	C2_005_DV_005.bmp	s	1676
SG_MatchingHamood_14_V1_2	2	19	female	1	14	d	C2_012_DV_205.bmp	s	1729
SG_MatchingHamood_14_V1_2	2	19	female	1	15	d	C2_024_DV_030.bmp	d	3665
SG_MatchingHamood_14_V1_2	2	19	female	1	16	d	C2_010_DV_303.bmp	s	1924
SG_MatchingHamood_14_V1_2	2	19	female	1	17	d	C2_021_DV_087.bmp	s	7868
SG_MatchingHamood_14_V1_2	2	19	female	1	18	d	C2_018_DV_019.bmp	s	2552
SG_MatchingHamood_14_V1_2	2	19	female	1	19	d	C2_050_DV_215.bmp	d	4897
SG_MatchingHamood_14_V1_2	2	19	female	1	20	s	DV_029_C2_029.bmp	s	1641
SG_MatchingHamood_14_V1_2	2	19	female	1	21	d	C2_004_DV_293.bmp	s	5455
SG_MatchingHamood_14_V1_2	2	19	female	1	22	d	C2_023_DV_304.bmp	s	2970
SG_MatchingHamood_14_V1_2	2	19	female	1	23	d	C2_261_DV_201.bmp	d	2938
SG_MatchingHamood_14_V1_2	2	19	female	1	24	s	C2_035_DV_035.bmp	s	2826
SG_MatchingHamood_14_V1_2	2	19	female	1	25	s	DV_062_C2_062.bmp	s	1607
SG_MatchingHamood_14_V1_2	2	19	female	1	26	s	C2_017_DV_017.bmp	s	3172
SG_MatchingHamood_14_V1_2	2	19	female	1	27	d	C2_037_DV_085.bmp	s	1797
SG_MatchingHamood_14_V1_2	2	19	female	1	28	d	C2_009_DV_033.bmp	d	4689
SG_MatchingHamood_14_V1_2	2	19	female	1	29	s	C2_056_DV_056.bmp	s	1148
SG_MatchingHamood_14_V1_2	2	19	female	1	30	s	C2_040_DV_040.bmp	s	1395
SG_MatchingHamood_14_V1_2	2	19	female	1	31	s	C2_025_DV_025.bmp	s	1795
SG_MatchingHamood_14_V1_2	2	19	female	1	32	d	C2_033_DV_180.bmp	d	4559
SG_MatchingHamood_14_V1_2	2	19	female	1	33	s	C2_031_DV_031.bmp	d	1529
SG_MatchingHamood_14_V1_2	2	19	female	1	34	d	C2_011_DV_049.bmp	s	4121
SG_MatchingHamood_14_V1_2	2	19	female	1	35	d	C2_007_DV_097.bmp	d	4273
SG_MatchingHamood_14_V1_2	2	19	female	1	36	s	C2_054_DV_054.bmp	s	1660
SG_MatchingHamood_14_V1_2	2	19	female	1	37	s	C2_061_DV_061.bmp	s	1008
SG_MatchingHamood_14_V1_2	2	19	female	1	38	s	C2_028_DV_028.bmp	s	1734
SG_MatchingHamood_14_V1_2	2	19	female	1	39	s	C2_014_DV_014.bmp	s	1054
SG_MatchingHamood_14_V1_2	2	19	female	1	40	d	C2_041_DV_044.bmp	d	11075
SG_MatchingHamood_14_V1_2	2	19	female	2	1	s	C2_102_DV_102.bmp	s	1030
SG_MatchingHamood_14_V1_2	2	19	female	2	2	s	DV_100_C2_100.bmp	s	1176
SG_MatchingHamood_14_V1_2	2	19	female	2	3	s	C2_069_DV_069.bmp	s	993
SG_MatchingHamood_14_V1_2	2	19	female	2	4	s	DV_104_C2_104.bmp	s	2559
SG_MatchingHamood_14_V1_2	2	19	female	2	5	d	C2_091_DV_283.bmp	d	3974
SG_MatchingHamood_14_V1_2	2	19	female	2	6	s	C2_084_DV_084.bmp	s	1446
SG_MatchingHamood_14_V1_2	2	19	female	2	7	s	C2_078_DV_078.bmp	s	1089
SG_MatchingHamood_14_V1_2	2	19	female	2	8	s	C2_068_DV_068.bmp	s	1013
SG_MatchingHamood_14_V1_2	2	19	female	2	9	d	C2_092_DV_227.bmp	d	10953
SG_MatchingHamood_14_V1_2	2	19	female	2	10	d	C2_098_DV_024.bmp	d	2657
SG_MatchingHamood_14_V1_2	2	19	female	2	11	s	C2_079_DV_079.bmp	s	1134
SG_MatchingHamood_14_V1_2	2	19	female	2	12	d	C2_070_DV_012.bmp	d	5007
SG_MatchingHamood_14_V1_2	2	19	female	2	13	s	C2_082_DV_082.bmp	s	1644
SG_MatchingHamood_14_V1_2	2	19	female	2	14	d	C2_117_DV_219.bmp	d	3880
SG_MatchingHamood_14_V1_2	2	19	female	2	15	d	C2_174_DV_183.bmp	s	2243
SG_MatchingHamood_14_V1_2	2	19	female	2	16	d	C2_057_DV_067.bmp	s	1574
SG_MatchingHamood_14_V1_2	2	19	female	2	17	s	DV_103_C2_103.bmp	s	1287
SG_MatchingHamood_14_V1_2	2	19	female	2	18	s	C2_066_DV_066.bmp	s	1626
SG_MatchingHamood_14_V1_2	2	19	female	2	19	d	C2_211_DV_128.bmp	s	2335
SG_MatchingHamood_14_V1_2	2	19	female	2	20	d	C2_095_DV_229.bmp	s	1647
SG_MatchingHamood_14_V1_2	2	19	female	2	21	s	C2_063_DV_063.bmp	s	996
SG_MatchingHamood_14_V1_2	2	19	female	2	22	s	C2_071_DV_071.bmp	s	1185
SG_MatchingHamood_14_V1_2	2	19	female	2	23	d	C2_182_DV_184.bmp	d	1727
SG_MatchingHamood_14_V1_2	2	19	female	2	24	d	C2_055_DV_059.bmp	s	1848
SG_MatchingHamood_14_V1_2	2	19	female	2	25	s	DV_064_C2_064.bmp	s	5517
SG_MatchingHamood_14_V1_2	2	19	female	2	26	s	C2_073_DV_073.bmp	s	3949
SG_MatchingHamood_14_V1_2	2	19	female	2	27	d	C2_076_DV_051.bmp	d	2646
SG_MatchingHamood_14_V1_2	2	19	female	2	28	s	C2_101_DV_101.bmp	s	1257
SG_MatchingHamood_14_V1_2	2	19	female	2	29	s	DV_089_C2_089.bmp	d	6102
SG_MatchingHamood_14_V1_2	2	19	female	2	30	d	C2_206_DV_077.bmp	s	3038
SG_MatchingHamood_14_V1_2	2	19	female	2	31	d	C2_123_DV_223.bmp	d	3331
SG_MatchingHamood_14_V1_2	2	19	female	2	32	s	C2_065_DV_065.bmp	s	1274
SG_MatchingHamood_14_V1_2	2	19	female	2	33	d	C2_218_DV_109.bmp	d	7831
SG_MatchingHamood_14_V1_2	2	19	female	2	34	d	C2_108_DV_282.bmp	d	2236
SG_MatchingHamood_14_V1_2	2	19	female	2	35	s	C2_080_DV_080.bmp	s	11913
SG_MatchingHamood_14_V1_2	2	19	female	2	36	d	C2_139_DV_120.bmp	d	2306
SG_MatchingHamood_14_V1_2	2	19	female	2	37	d	C2_002_DV_041.bmp	d	7186
SG_MatchingHamood_14_V1_2	2	19	female	2	38	d	C2_143_DV_254.bmp	s	2055
SG_MatchingHamood_14_V1_2	2	19	female	2	39	s	DV_086_C2_086.bmp	s	949
SG_MatchingHamood_14_V1_2	2	19	female	2	40	d	C2_171_DV_185.bmp	s	1485
SG_MatchingHamood_14_V1_2	2	19	female	3	1	s	DV_137_C2_137.bmp	s	8949
SG_MatchingHamood_14_V1_2	2	19	female	3	2	d	C2_246_DV_160.bmp	s	2135
SG_MatchingHamood_14_V1_2	2	19	female	3	3	d	C2_266_DV_227.bmp	s	2951
SG_MatchingHamood_14_V1_2	2	19	female	3	4	d	DV_009_C2_180.bmp	d	1855
SG_MatchingHamood_14_V1_2	2	19	female	3	5	s	C2_112_DV_112.bmp	s	6162
SG_MatchingHamood_14_V1_2	2	19	female	3	6	d	DV_012_C2_205.bmp	d	5915
SG_MatchingHamood_14_V1_2	2	19	female	3	7	d	C2_242_DV_246.bmp	d	4916
SG_MatchingHamood_14_V1_2	2	19	female	3	8	s	C2_134_DV_134.bmp	s	973
SG_MatchingHamood_14_V1_2	2	19	female	3	9	d	C2_003_DV_018.bmp	d	1235
SG_MatchingHamood_14_V1_2	2	19	female	3	10	s	C2_142_DV_142.bmp	s	1040
SG_MatchingHamood_14_V1_2	2	19	female	3	11	d	C2_249_DV_083.bmp	d	5398
SG_MatchingHamood_14_V1_2	2	19	female	3	12	s	C2_131_DV_131.bmp	s	3810
SG_MatchingHamood_14_V1_2	2	19	female	3	13	d	C2_232_DV_048.bmp	d	7232
SG_MatchingHamood_14_V1_2	2	19	female	3	14	d	C2_252_DV_125.bmp	d	2861
SG_MatchingHamood_14_V1_2	2	19	female	3	15	d	C2_261_DV_287.bmp	d	3088
SG_MatchingHamood_14_V1_2	2	19	female	3	16	s	C2_116_DV_116.bmp	s	1354
SG_MatchingHamood_14_V1_2	2	19	female	3	17	d	DV_013_C2_235.bmp	d	2002
SG_MatchingHamood_14_V1_2	2	19	female	3	18	d	DV_024_C2_085.bmp	d	4352
SG_MatchingHamood_14_V1_2	2	19	female	3	19	s	DV_147_C2_147.bmp	s	1585
SG_MatchingHamood_14_V1_2	2	19	female	3	20	s	C2_113_DV_113.bmp	s	2727
SG_MatchingHamood_14_V1_2	2	19	female	3	21	s	C2_146_DV_146.bmp	s	3657
SG_MatchingHamood_14_V1_2	2	19	female	3	22	d	C2_304_DV_099.bmp	d	5701
SG_MatchingHamood_14_V1_2	2	19	female	3	23	d	C2_223_DV_242.bmp	d	6436
SG_MatchingHamood_14_V1_2	2	19	female	3	24	d	C2_289_DV_039.bmp	d	3203
SG_MatchingHamood_14_V1_2	2	19	female	3	25	d	C2_240_DV_044.bmp	s	1065
SG_MatchingHamood_14_V1_2	2	19	female	3	26	s	C2_119_DV_119.bmp	s	3611
SG_MatchingHamood_14_V1_2	2	19	female	3	27	s	C2_144_DV_144.bmp	s	2113
SG_MatchingHamood_14_V1_2	2	19	female	3	28	s	C2_152_DV_152.bmp	s	6985
SG_MatchingHamood_14_V1_2	2	19	female	3	29	s	DV_111_C2_111.bmp	s	3337
SG_MatchingHamood_14_V1_2	2	19	female	3	30	s	C2_124_DV_124.bmp	s	1873
SG_MatchingHamood_14_V1_2	2	19	female	3	31	s	DV_127_C2_127.bmp	s	741
SG_MatchingHamood_14_V1_2	2	19	female	3	32	d	DV_037_C2_303.bmp	s	7332
SG_MatchingHamood_14_V1_2	2	19	female	3	33	s	C2_105_DV_105.bmp	s	1334
SG_MatchingHamood_14_V1_2	2	19	female	3	34	s	DV_141_C2_141.bmp	s	3382
SG_MatchingHamood_14_V1_2	2	19	female	3	35	d	C2_239_DV_114.bmp	d	1484
SG_MatchingHamood_14_V1_2	2	19	female	3	36	d	DV_032_C2_153.bmp	d	4559
SG_MatchingHamood_14_V1_2	2	19	female	3	37	d	DV_020_C2_090.bmp	s	3670
SG_MatchingHamood_14_V1_2	2	19	female	3	38	s	C2_115_DV_115.bmp	d	2017
SG_MatchingHamood_14_V1_2	2	19	female	3	39	s	DV_118_C2_118.bmp	s	1943
SG_MatchingHamood_14_V1_2	2	19	female	3	40	s	C2_140_DV_140.bmp	s	1575
SG_MatchingHamood_14_V1_2	2	19	female	4	1	s	DV_190_C2_190.bmp	s	1214
SG_MatchingHamood_14_V1_2	2	19	female	4	2	s	C2_155_DV_155.bmp	s	2227
SG_MatchingHamood_14_V1_2	2	19	female	4	3	s	DV_161_C2_161.bmp	s	1143
SG_MatchingHamood_14_V1_2	2	19	female	4	4	d	DV_129_C2_199.bmp	d	2993
SG_MatchingHamood_14_V1_2	2	19	female	4	5	d	DV_088_C2_295.bmp	d	1287
SG_MatchingHamood_14_V1_2	2	19	female	4	6	s	C2_157_DV_157.bmp	s	1199
SG_MatchingHamood_14_V1_2	2	19	female	4	7	d	DV_074_C2_075.bmp	s	1416
SG_MatchingHamood_14_V1_2	2	19	female	4	8	d	DV_091_C2_211.bmp	d	1499
SG_MatchingHamood_14_V1_2	2	19	female	4	9	s	C2_243_DV_243.bmp	d	2669
SG_MatchingHamood_14_V1_2	2	19	female	4	10	d	DV_160_C2_154.bmp	d	2136
SG_MatchingHamood_14_V1_2	2	19	female	4	11	d	DV_120_C2_133.bmp	d	2160
SG_MatchingHamood_14_V1_2	2	19	female	4	12	d	DV_109_C2_268.bmp	d	2263
SG_MatchingHamood_14_V1_2	2	19	female	4	13	s	DV_214_C2_214.bmp	s	6900
SG_MatchingHamood_14_V1_2	2	19	female	4	14	s	DV_200_C2_200.bmp	s	2092
SG_MatchingHamood_14_V1_2	2	19	female	4	15	s	C2_194_DV_194.bmp	s	3111
SG_MatchingHamood_14_V1_2	2	19	female	4	16	d	DV_130_C2_253.bmp	d	5073
SG_MatchingHamood_14_V1_2	2	19	female	4	17	s	C2_207_DV_207.bmp	s	3036
SG_MatchingHamood_14_V1_2	2	19	female	4	18	d	DV_126_C2_076.bmp	d	10288
SG_MatchingHamood_14_V1_2	2	19	female	4	19	s	DV_222_C2_222.bmp	s	2011
SG_MatchingHamood_14_V1_2	2	19	female	4	20	s	DV_204_C2_204.bmp	s	1265
SG_MatchingHamood_14_V1_2	2	19	female	4	21	d	DV_052_C2_264.bmp	s	3596
SG_MatchingHamood_14_V1_2	2	19	female	4	22	s	C2_181_Dv_181.bmp	s	2409
SG_MatchingHamood_14_V1_2	2	19	female	4	23	s	DV_167_C2_167.bmp	s	937
SG_MatchingHamood_14_V1_2	2	19	female	4	24	s	DV_231_C2_231.bmp	d	4136
SG_MatchingHamood_14_V1_2	2	19	female	4	25	d	DV_094_C2_022.bmp	d	2334
SG_MatchingHamood_14_V1_2	2	19	female	4	26	d	DV_053_C2_208.bmp	d	1784
SG_MatchingHamood_14_V1_2	2	19	female	4	27	s	C2_172_DV_172.bmp	s	1568
SG_MatchingHamood_14_V1_2	2	19	female	4	28	d	DV_039_C2_296.bmp	d	1830
SG_MatchingHamood_14_V1_2	2	19	female	4	29	d	DV_108_C2_038.bmp	s	4836
SG_MatchingHamood_14_V1_2	2	19	female	4	30	d	DV_081_C2_282.bmp	d	2831
SG_MatchingHamood_14_V1_2	2	19	female	4	31	s	DV_248_C2_248.bmp	s	1460
SG_MatchingHamood_14_V1_2	2	19	female	4	32	s	C2_247_DV_247.bmp	s	1135
SG_MatchingHamood_14_V1_2	2	19	female	4	33	d	DV_048_C2_175.bmp	d	1432
SG_MatchingHamood_14_V1_2	2	19	female	4	34	d	DV_114_C2_126.bmp	d	1357
SG_MatchingHamood_14_V1_2	2	19	female	4	35	d	DV_178_C2_060.bmp	d	1500
SG_MatchingHamood_14_V1_2	2	19	female	4	36	d	DV_132_C2_210.bmp	s	1862
SG_MatchingHamood_14_V1_2	2	19	female	4	37	d	DV_045_C2_027.bmp	s	2009
SG_MatchingHamood_14_V1_2	2	19	female	4	38	s	C2_226_DV_226.bmp	s	1104
SG_MatchingHamood_14_V1_2	2	19	female	4	39	s	C2_158_DV_158.bmp	s	1513
SG_MatchingHamood_14_V1_2	2	19	female	4	40	s	DV_166_C2_166.bmp	s	1156
SG_MatchingHamood_14_V1_2	2	19	female	5	1	s	C2_256_DV_256.bmp	s	1314
SG_MatchingHamood_14_V1_2	2	19	female	5	2	s	C2_258_DV_258.bmp	s	1059
SG_MatchingHamood_14_V1_2	2	19	female	5	3	d	DV_217_C2_185.bmp	d	5335
SG_MatchingHamood_14_V1_2	2	19	female	5	4	s	DV_299_C2_299.bmp	s	4566
SG_MatchingHamood_14_V1_2	2	19	female	5	5	s	DV_298_C2_298.bmp	s	1142
SG_MatchingHamood_14_V1_2	2	19	female	5	6	s	DV_300_C2_300.bmp	s	1822
SG_MatchingHamood_14_V1_2	2	19	female	5	7	s	C2_271_DV_271.bmp	s	3843
SG_MatchingHamood_14_V1_2	2	19	female	5	8	d	DV_295_C2_216.bmp	d	2127
SG_MatchingHamood_14_V1_2	2	19	female	5	9	d	DV_280_C2_003.bmp	d	3102
SG_MatchingHamood_14_V1_2	2	19	female	5	10	d	C2_083_DV_108.bmp	d	1682
SG_MatchingHamood_14_V1_2	2	19	female	5	11	d	DV_237_C2_297.bmp	d	1197
SG_MatchingHamood_14_V1_2	2	19	female	5	12	d	DV_133_C2_139.bmp	d	3092
SG_MatchingHamood_14_V1_2	2	19	female	5	13	d	DV_154_C2_042.bmp	d	1518
SG_MatchingHamood_14_V1_2	2	19	female	5	14	d	DV_178_C2_099.bmp	s	1518
SG_MatchingHamood_14_V1_2	2	19	female	5	15	s	C2_260_DV_260.bmp	s	1304
SG_MatchingHamood_14_V1_2	2	19	female	5	16	s	DV_259_C2_259.bmp	s	1106
SG_MatchingHamood_14_V1_2	2	19	female	5	17	d	DV_254_C2_287.bmp	s	1075
SG_MatchingHamood_14_V1_2	2	19	female	5	18	s	DV_284_C2_284.bmp	s	2615
SG_MatchingHamood_14_V1_2	2	19	female	5	19	s	DV_286_C2_286.bmp	s	1701
SG_MatchingHamood_14_V1_2	2	19	female	5	20	d	DV_238_C2_218.bmp	d	2855
SG_MatchingHamood_14_V1_2	2	19	female	5	21	s	C2_294_DV_294.bmp	s	1594
SG_MatchingHamood_14_V1_2	2	19	female	5	22	d	DV_219_C2_135.bmp	s	4385
SG_MatchingHamood_14_V1_2	2	19	female	5	23	s	C2_302_DV_302.bmp	d	1951
SG_MatchingHamood_14_V1_2	2	19	female	5	24	d	DV_244_C2_042.bmp	d	1311
SG_MatchingHamood_14_V1_2	2	19	female	5	25	d	DV_132_C2_168.bmp	d	7478
SG_MatchingHamood_14_V1_2	2	19	female	5	26	d	C2_008_DV_039.bmp	d	3955
SG_MatchingHamood_14_V1_2	2	19	female	5	27	s	C2_257_DV_257.bmp	s	1866
SG_MatchingHamood_14_V1_2	2	19	female	5	28	d	DV_208_C2_183.bmp	s	1341
SG_MatchingHamood_14_V1_2	2	19	female	5	29	s	DV_265_C2_265.bmp	s	5622
SG_MatchingHamood_14_V1_2	2	19	female	5	30	s	C2_290_DV_290.bmp	s	1236
SG_MatchingHamood_14_V1_2	2	19	female	5	31	d	DV_296_C2_235.bmp	d	3585
SG_MatchingHamood_14_V1_2	2	19	female	5	32	s	C2_288_DV_288.bmp	s	1847
SG_MatchingHamood_14_V1_2	2	19	female	5	33	d	DV_203_C2_277.bmp	d	1771
SG_MatchingHamood_14_V1_2	2	19	female	5	34	d	DV_170_C2_270.bmp	d	7257
SG_MatchingHamood_14_V1_2	2	19	female	5	35	s	DV_274_C2_274.bmp	s	5716
SG_MatchingHamood_14_V1_2	2	19	female	5	36	d	DV_277_C2_110.bmp	d	1327
SG_MatchingHamood_14_V1_2	2	19	female	5	37	s	DV_267_C2_267.bmp	d	1599
SG_MatchingHamood_14_V1_2	2	19	female	5	38	d	DV_199_C2_125.bmp	d	8781
SG_MatchingHamood_14_V1_2	2	19	female	5	39	s	C2_291_DV_291.bmp	s	1979
SG_MatchingHamood_14_V1_2	2	19	female	5	40	s	C2_278_DV_278.bmp	s	2250
SG_MatchingHamood_14_V1_3	2	19	female	1	1	s	C2_061_DV_061.bmp	s	3022
SG_MatchingHamood_14_V1_3	2	19	female	1	2	d	C2_010_DV_303.bmp	s	2122
SG_MatchingHamood_14_V1_3	2	19	female	1	3	s	C2_005_DV_005.bmp	s	1419
SG_MatchingHamood_14_V1_3	2	19	female	1	4	s	C2_031_DV_031.bmp	s	1257
SG_MatchingHamood_14_V1_3	2	19	female	1	5	s	C2_040_DV_040.bmp	s	1174
SG_MatchingHamood_14_V1_3	2	19	female	1	6	d	DV_303_C2_217.bmp	d	1893
SG_MatchingHamood_14_V1_3	2	19	female	1	7	s	C2_007_DV_007.bmp	s	1328
SG_MatchingHamood_14_V1_3	2	19	female	1	8	d	C2_004_DV_293.bmp	s	1120
SG_MatchingHamood_14_V1_3	2	19	female	1	9	s	DV_062_C2_062.bmp	s	1233
SG_MatchingHamood_14_V1_3	2	19	female	1	10	s	C2_028_DV_028.bmp	s	3294
SG_MatchingHamood_14_V1_3	2	19	female	1	11	d	C2_038_DV_081.bmp	d	1417
SG_MatchingHamood_14_V1_3	2	19	female	1	12	d	C2_024_DV_030.bmp	d	2149
SG_MatchingHamood_14_V1_3	2	19	female	1	13	d	C2_261_DV_201.bmp	d	1502
SG_MatchingHamood_14_V1_3	2	19	female	1	14	d	C2_011_DV_049.bmp	d	3472
SG_MatchingHamood_14_V1_3	2	19	female	1	15	s	C2_043_DV_043.bmp	s	1411
SG_MatchingHamood_14_V1_3	2	19	female	1	16	d	C2_021_DV_087.bmp	d	6065
SG_MatchingHamood_14_V1_3	2	19	female	1	17	d	C2_018_DV_019.bmp	s	1972
SG_MatchingHamood_14_V1_3	2	19	female	1	18	s	DV_029_C2_029.bmp	s	1517
SG_MatchingHamood_14_V1_3	2	19	female	1	19	d	C2_051_DV_238.bmp	d	1462
SG_MatchingHamood_14_V1_3	2	19	female	1	20	s	C2_036_DV_036.bmp	s	1744
SG_MatchingHamood_14_V1_3	2	19	female	1	21	s	C2_056_DV_056.bmp	s	1376
SG_MatchingHamood_14_V1_3	2	19	female	1	22	d	C2_037_DV_085.bmp	s	1664
SG_MatchingHamood_14_V1_3	2	19	female	1	23	d	C2_050_DV_215.bmp	d	5203
SG_MatchingHamood_14_V1_3	2	19	female	1	24	s	C2_014_DV_014.bmp	s	1745
SG_MatchingHamood_14_V1_3	2	19	female	1	25	s	DV_046_C2_046.bmp	s	1890
SG_MatchingHamood_14_V1_3	2	19	female	1	26	s	DV_015_C2_015.bmp	s	2933
SG_MatchingHamood_14_V1_3	2	19	female	1	27	d	DV_129_C2_092.bmp	d	12452
SG_MatchingHamood_14_V1_3	2	19	female	1	28	s	C2_054_DV_054.bmp	s	2161
SG_MatchingHamood_14_V1_3	2	19	female	1	29	s	C2_034_DV_034.bmp	s	1273
SG_MatchingHamood_14_V1_3	2	19	female	1	30	s	C2_035_DV_035.bmp	s	3613
SG_MatchingHamood_14_V1_3	2	19	female	1	31	d	C2_039_DV_072.bmp	d	4234
SG_MatchingHamood_14_V1_3	2	19	female	1	32	d	C2_041_DV_044.bmp	d	2911
SG_MatchingHamood_14_V1_3	2	19	female	1	33	d	C2_023_DV_304.bmp	s	2256
SG_MatchingHamood_14_V1_3	2	19	female	1	34	s	C2_025_DV_025.bmp	s	2053
SG_MatchingHamood_14_V1_3	2	19	female	1	35	d	C2_007_DV_097.bmp	d	2456
SG_MatchingHamood_14_V1_3	2	19	female	1	36	d	C2_012_DV_205.bmp	d	1395
SG_MatchingHamood_14_V1_3	2	19	female	1	37	s	C2_017_DV_017.bmp	s	2073
SG_MatchingHamood_14_V1_3	2	19	female	1	38	s	C2_016_DV_016.bmp	s	974
SG_MatchingHamood_14_V1_3	2	19	female	1	39	d	C2_009_DV_033.bmp	d	1334
SG_MatchingHamood_14_V1_3	2	19	female	1	40	d	C2_033_DV_180.bmp	d	1214
SG_MatchingHamood_14_V1_3	2	19	female	2	1	s	C2_082_DV_082.bmp	s	891
SG_MatchingHamood_14_V1_3	2	19	female	2	2	d	C2_171_DV_185.bmp	d	3519
SG_MatchingHamood_14_V1_3	2	19	female	2	3	d	C2_218_DV_109.bmp	d	3144
SG_MatchingHamood_14_V1_3	2	19	female	2	4	s	DV_064_C2_064.bmp	s	1112
SG_MatchingHamood_14_V1_3	2	19	female	2	5	s	C2_071_DV_071.bmp	s	1257
SG_MatchingHamood_14_V1_3	2	19	female	2	6	d	C2_123_DV_223.bmp	s	2885
SG_MatchingHamood_14_V1_3	2	19	female	2	7	d	C2_057_DV_067.bmp	d	1448
SG_MatchingHamood_14_V1_3	2	19	female	2	8	s	C2_068_DV_068.bmp	s	755
SG_MatchingHamood_14_V1_3	2	19	female	2	9	s	C2_063_DV_063.bmp	s	916
SG_MatchingHamood_14_V1_3	2	19	female	2	10	d	C2_139_DV_120.bmp	d	1277
SG_MatchingHamood_14_V1_3	2	19	female	2	11	s	C2_080_DV_080.bmp	s	3967
SG_MatchingHamood_14_V1_3	2	19	female	2	12	s	DV_103_C2_103.bmp	s	1872
SG_MatchingHamood_14_V1_3	2	19	female	2	13	d	C2_095_DV_229.bmp	s	1964
SG_MatchingHamood_14_V1_3	2	19	female	2	14	d	C2_182_DV_184.bmp	d	1235
SG_MatchingHamood_14_V1_3	2	19	female	2	15	s	C2_073_DV_073.bmp	d	2256
SG_MatchingHamood_14_V1_3	2	19	female	2	16	d	C2_098_DV_024.bmp	s	3771
SG_MatchingHamood_14_V1_3	2	19	female	2	17	s	DV_089_C2_089.bmp	d	2060
SG_MatchingHamood_14_V1_3	2	19	female	2	18	d	C2_211_DV_128.bmp	s	7055
SG_MatchingHamood_14_V1_3	2	19	female	2	19	s	C2_101_DV_101.bmp	s	1123
SG_MatchingHamood_14_V1_3	2	19	female	2	20	s	DV_104_C2_104.bmp	s	1334
SG_MatchingHamood_14_V1_3	2	19	female	2	21	d	C2_002_DV_041.bmp	d	1086
SG_MatchingHamood_14_V1_3	2	19	female	2	22	d	C2_076_DV_051.bmp	d	1520
SG_MatchingHamood_14_V1_3	2	19	female	2	23	s	C2_078_DV_078.bmp	s	1129
SG_MatchingHamood_14_V1_3	2	19	female	2	24	s	C2_065_DV_065.bmp	s	1475
SG_MatchingHamood_14_V1_3	2	19	female	2	25	d	C2_091_DV_283.bmp	d	2886
SG_MatchingHamood_14_V1_3	2	19	female	2	26	d	C2_117_DV_219.bmp	d	2663
SG_MatchingHamood_14_V1_3	2	19	female	2	27	d	C2_206_DV_077.bmp	d	2755
SG_MatchingHamood_14_V1_3	2	19	female	2	28	s	DV_086_C2_086.bmp	s	1252
SG_MatchingHamood_14_V1_3	2	19	female	2	29	d	C2_070_DV_012.bmp	d	1807
SG_MatchingHamood_14_V1_3	2	19	female	2	30	s	C2_069_DV_069.bmp	s	965
SG_MatchingHamood_14_V1_3	2	19	female	2	31	d	C2_143_DV_254.bmp	s	2397
SG_MatchingHamood_14_V1_3	2	19	female	2	32	d	C2_174_DV_183.bmp	s	2722
SG_MatchingHamood_14_V1_3	2	19	female	2	33	s	C2_066_DV_066.bmp	d	2436
SG_MatchingHamood_14_V1_3	2	19	female	2	34	d	C2_055_DV_059.bmp	s	3633
SG_MatchingHamood_14_V1_3	2	19	female	2	35	s	C2_084_DV_084.bmp	s	1335
SG_MatchingHamood_14_V1_3	2	19	female	2	36	s	DV_100_C2_100.bmp	s	670
SG_MatchingHamood_14_V1_3	2	19	female	2	37	d	C2_108_DV_282.bmp	d	1856
SG_MatchingHamood_14_V1_3	2	19	female	2	38	s	C2_079_DV_079.bmp	s	1199
SG_MatchingHamood_14_V1_3	2	19	female	2	39	s	C2_102_DV_102.bmp	s	1188
SG_MatchingHamood_14_V1_3	2	19	female	2	40	d	C2_092_DV_227.bmp	d	3787
SG_MatchingHamood_14_V1_3	2	19	female	3	1	d	C2_240_DV_044.bmp	s	1897
SG_MatchingHamood_14_V1_3	2	19	female	3	2	d	DV_032_C2_153.bmp	d	5219
SG_MatchingHamood_14_V1_3	2	19	female	3	3	s	C2_105_DV_105.bmp	s	1752
SG_MatchingHamood_14_V1_3	2	19	female	3	4	s	C2_140_DV_140.bmp	s	1328
SG_MatchingHamood_14_V1_3	2	19	female	3	5	d	C2_266_DV_227.bmp	s	3224
SG_MatchingHamood_14_V1_3	2	19	female	3	6	s	C2_142_DV_142.bmp	s	1062
SG_MatchingHamood_14_V1_3	2	19	female	3	7	d	DV_009_C2_180.bmp	d	1929
SG_MatchingHamood_14_V1_3	2	19	female	3	8	s	DV_147_C2_147.bmp	s	1538
SG_MatchingHamood_14_V1_3	2	19	female	3	9	d	DV_024_C2_085.bmp	d	1707
SG_MatchingHamood_14_V1_3	2	19	female	3	10	d	C2_232_DV_048.bmp	d	3109
SG_MatchingHamood_14_V1_3	2	19	female	3	11	d	DV_020_C2_090.bmp	s	1273
SG_MatchingHamood_14_V1_3	2	19	female	3	12	s	DV_137_C2_137.bmp	s	1420
SG_MatchingHamood_14_V1_3	2	19	female	3	13	d	C2_003_DV_018.bmp	d	1104
SG_MatchingHamood_14_V1_3	2	19	female	3	14	d	C2_246_DV_160.bmp	s	1010
SG_MatchingHamood_14_V1_3	2	19	female	3	15	s	C2_144_DV_144.bmp	d	6792
SG_MatchingHamood_14_V1_3	2	19	female	3	16	d	C2_289_DV_039.bmp	d	1902
SG_MatchingHamood_14_V1_3	2	19	female	3	17	d	C2_261_DV_287.bmp	d	2745
SG_MatchingHamood_14_V1_3	2	19	female	3	18	s	C2_131_DV_131.bmp	s	1336
SG_MatchingHamood_14_V1_3	2	19	female	3	19	s	C2_124_DV_124.bmp	s	1066
SG_MatchingHamood_14_V1_3	2	19	female	3	20	s	C2_112_DV_112.bmp	s	1396
SG_MatchingHamood_14_V1_3	2	19	female	3	21	s	C2_116_DV_116.bmp	s	1020
SG_MatchingHamood_14_V1_3	2	19	female	3	22	s	DV_118_C2_118.bmp	s	1321
SG_MatchingHamood_14_V1_3	2	19	female	3	23	d	C2_239_DV_114.bmp	s	738
SG_MatchingHamood_14_V1_3	2	19	female	3	24	s	C2_134_DV_134.bmp	s	977
SG_MatchingHamood_14_V1_3	2	19	female	3	25	s	C2_146_DV_146.bmp	s	1562
SG_MatchingHamood_14_V1_3	2	19	female	3	26	d	C2_249_DV_083.bmp	d	4185
SG_MatchingHamood_14_V1_3	2	19	female	3	27	s	C2_152_DV_152.bmp	s	1664
SG_MatchingHamood_14_V1_3	2	19	female	3	28	s	C2_119_DV_119.bmp	s	1522
SG_MatchingHamood_14_V1_3	2	19	female	3	29	d	DV_012_C2_205.bmp	d	1260
SG_MatchingHamood_14_V1_3	2	19	female	3	30	d	C2_304_DV_099.bmp	d	1672
SG_MatchingHamood_14_V1_3	2	19	female	3	31	s	DV_127_C2_127.bmp	s	755
SG_MatchingHamood_14_V1_3	2	19	female	3	32	d	DV_013_C2_235.bmp	d	2730
SG_MatchingHamood_14_V1_3	2	19	female	3	33	d	C2_223_DV_242.bmp	d	2141
SG_MatchingHamood_14_V1_3	2	19	female	3	34	d	C2_242_DV_246.bmp	d	1438
SG_MatchingHamood_14_V1_3	2	19	female	3	35	s	DV_111_C2_111.bmp	s	1250
SG_MatchingHamood_14_V1_3	2	19	female	3	36	d	DV_037_C2_303.bmp	s	2365
SG_MatchingHamood_14_V1_3	2	19	female	3	37	s	C2_113_DV_113.bmp	s	1757
SG_MatchingHamood_14_V1_3	2	19	female	3	38	s	C2_115_DV_115.bmp	s	1022
SG_MatchingHamood_14_V1_3	2	19	female	3	39	d	C2_252_DV_125.bmp	d	1363
SG_MatchingHamood_14_V1_3	2	19	female	3	40	s	DV_141_C2_141.bmp	d	2042
SG_MatchingHamood_14_V1_3	2	19	female	4	1	d	DV_160_C2_154.bmp	d	1479
SG_MatchingHamood_14_V1_3	2	19	female	4	2	d	DV_088_C2_295.bmp	d	1890
SG_MatchingHamood_14_V1_3	2	19	female	4	3	d	DV_045_C2_027.bmp	d	2011
SG_MatchingHamood_14_V1_3	2	19	female	4	4	d	DV_108_C2_038.bmp	s	1200
SG_MatchingHamood_14_V1_3	2	19	female	4	5	d	DV_052_C2_264.bmp	d	1783
SG_MatchingHamood_14_V1_3	2	19	female	4	6	s	DV_167_C2_167.bmp	s	1494
SG_MatchingHamood_14_V1_3	2	19	female	4	7	d	DV_048_C2_175.bmp	d	2040
SG_MatchingHamood_14_V1_3	2	19	female	4	8	d	DV_074_C2_075.bmp	s	1837
SG_MatchingHamood_14_V1_3	2	19	female	4	9	d	DV_094_C2_022.bmp	d	1513
SG_MatchingHamood_14_V1_3	2	19	female	4	10	s	C2_172_DV_172.bmp	d	4627
SG_MatchingHamood_14_V1_3	2	19	female	4	11	d	DV_109_C2_268.bmp	d	1815
SG_MatchingHamood_14_V1_3	2	19	female	4	12	d	DV_114_C2_126.bmp	d	1549
SG_MatchingHamood_14_V1_3	2	19	female	4	13	s	DV_190_C2_190.bmp	s	846
SG_MatchingHamood_14_V1_3	2	19	female	4	14	s	C2_157_DV_157.bmp	s	890
SG_MatchingHamood_14_V1_3	2	19	female	4	15	s	DV_231_C2_231.bmp	s	4667
SG_MatchingHamood_14_V1_3	2	19	female	4	16	d	DV_132_C2_210.bmp	d	3176
SG_MatchingHamood_14_V1_3	2	19	female	4	17	d	DV_129_C2_199.bmp	d	1840
SG_MatchingHamood_14_V1_3	2	19	female	4	18	d	DV_053_C2_208.bmp	d	3828
SG_MatchingHamood_14_V1_3	2	19	female	4	19	s	C2_243_DV_243.bmp	s	1217
SG_MatchingHamood_14_V1_3	2	19	female	4	20	s	DV_166_C2_166.bmp	s	832
SG_MatchingHamood_14_V1_3	2	19	female	4	21	s	C2_181_Dv_181.bmp	s	1531
SG_MatchingHamood_14_V1_3	2	19	female	4	22	s	DV_222_C2_222.bmp	s	1172
SG_MatchingHamood_14_V1_3	2	19	female	4	23	d	DV_039_C2_296.bmp	d	1363
SG_MatchingHamood_14_V1_3	2	19	female	4	24	s	C2_155_DV_155.bmp	s	1067
SG_MatchingHamood_14_V1_3	2	19	female	4	25	d	DV_126_C2_076.bmp	d	1910
SG_MatchingHamood_14_V1_3	2	19	female	4	26	s	DV_161_C2_161.bmp	s	1095
SG_MatchingHamood_14_V1_3	2	19	female	4	27	s	C2_226_DV_226.bmp	s	1681
SG_MatchingHamood_14_V1_3	2	19	female	4	28	s	C2_247_DV_247.bmp	s	1107
SG_MatchingHamood_14_V1_3	2	19	female	4	29	s	C2_158_DV_158.bmp	s	1006
SG_MatchingHamood_14_V1_3	2	19	female	4	30	s	DV_200_C2_200.bmp	s	1012
SG_MatchingHamood_14_V1_3	2	19	female	4	31	s	C2_207_DV_207.bmp	s	1026
SG_MatchingHamood_14_V1_3	2	19	female	4	32	s	C2_194_DV_194.bmp	s	807
SG_MatchingHamood_14_V1_3	2	19	female	4	33	d	DV_120_C2_133.bmp	s	6308
SG_MatchingHamood_14_V1_3	2	19	female	4	34	s	DV_214_C2_214.bmp	s	2335
SG_MatchingHamood_14_V1_3	2	19	female	4	35	s	DV_248_C2_248.bmp	s	1249
SG_MatchingHamood_14_V1_3	2	19	female	4	36	d	DV_178_C2_060.bmp	d	1812
SG_MatchingHamood_14_V1_3	2	19	female	4	37	d	DV_130_C2_253.bmp	s	2066
SG_MatchingHamood_14_V1_3	2	19	female	4	38	s	DV_204_C2_204.bmp	s	1221
SG_MatchingHamood_14_V1_3	2	19	female	4	39	d	DV_091_C2_211.bmp	d	1451
SG_MatchingHamood_14_V1_3	2	19	female	4	40	d	DV_081_C2_282.bmp	s	1238
SG_MatchingHamood_14_V1_3	2	19	female	5	1	d	DV_170_C2_270.bmp	d	1721
SG_MatchingHamood_14_V1_3	2	19	female	5	2	s	C2_271_DV_271.bmp	s	2964
SG_MatchingHamood_14_V1_3	2	19	female	5	3	d	DV_219_C2_135.bmp	d	1258
SG_MatchingHamood_14_V1_3	2	19	female	5	4	d	C2_083_DV_108.bmp	d	2368
SG_MatchingHamood_14_V1_3	2	19	female	5	5	s	DV_298_C2_298.bmp	s	1399
SG_MatchingHamood_14_V1_3	2	19	female	5	6	s	DV_300_C2_300.bmp	s	1517
SG_MatchingHamood_14_V1_3	2	19	female	5	7	d	DV_203_C2_277.bmp	s	1693
SG_MatchingHamood_14_V1_3	2	19	female	5	8	d	DV_280_C2_003.bmp	s	1752
SG_MatchingHamood_14_V1_3	2	19	female	5	9	d	DV_178_C2_099.bmp	s	1313
SG_MatchingHamood_14_V1_3	2	19	female	5	10	d	DV_277_C2_110.bmp	s	1490
SG_MatchingHamood_14_V1_3	2	19	female	5	11	s	C2_302_DV_302.bmp	s	1860
SG_MatchingHamood_14_V1_3	2	19	female	5	12	d	DV_244_C2_042.bmp	d	1319
SG_MatchingHamood_14_V1_3	2	19	female	5	13	s	DV_286_C2_286.bmp	s	2889
SG_MatchingHamood_14_V1_3	2	19	female	5	14	s	DV_284_C2_284.bmp	s	3707
SG_MatchingHamood_14_V1_3	2	19	female	5	15	s	C2_278_DV_278.bmp	d	1318
SG_MatchingHamood_14_V1_3	2	19	female	5	16	s	C2_290_DV_290.bmp	s	1776
SG_MatchingHamood_14_V1_3	2	19	female	5	17	s	C2_258_DV_258.bmp	s	1456
SG_MatchingHamood_14_V1_3	2	19	female	5	18	d	DV_238_C2_218.bmp	d	3820
SG_MatchingHamood_14_V1_3	2	19	female	5	19	s	C2_288_DV_288.bmp	s	2520
SG_MatchingHamood_14_V1_3	2	19	female	5	20	s	C2_260_DV_260.bmp	s	1251
SG_MatchingHamood_14_V1_3	2	19	female	5	21	s	DV_259_C2_259.bmp	s	4461
SG_MatchingHamood_14_V1_3	2	19	female	5	22	d	DV_133_C2_139.bmp	s	3146
SG_MatchingHamood_14_V1_3	2	19	female	5	23	s	C2_257_DV_257.bmp	s	698
SG_MatchingHamood_14_V1_3	2	19	female	5	24	s	DV_274_C2_274.bmp	s	602
SG_MatchingHamood_14_V1_3	2	19	female	5	25	d	DV_296_C2_235.bmp	d	1280
SG_MatchingHamood_14_V1_3	2	19	female	5	26	s	DV_265_C2_265.bmp	s	1541
SG_MatchingHamood_14_V1_3	2	19	female	5	27	d	C2_008_DV_039.bmp	s	1534
SG_MatchingHamood_14_V1_3	2	19	female	5	28	s	DV_267_C2_267.bmp	s	1334
SG_MatchingHamood_14_V1_3	2	19	female	5	29	d	DV_254_C2_287.bmp	s	1751
SG_MatchingHamood_14_V1_3	2	19	female	5	30	d	DV_295_C2_216.bmp	d	2391
SG_MatchingHamood_14_V1_3	2	19	female	5	31	s	C2_291_DV_291.bmp	s	1926
SG_MatchingHamood_14_V1_3	2	19	female	5	32	s	DV_299_C2_299.bmp	d	2958
SG_MatchingHamood_14_V1_3	2	19	female	5	33	d	DV_217_C2_185.bmp	s	3477
SG_MatchingHamood_14_V1_3	2	19	female	5	34	d	DV_199_C2_125.bmp	s	3298
SG_MatchingHamood_14_V1_3	2	19	female	5	35	d	DV_208_C2_183.bmp	s	4388
SG_MatchingHamood_14_V1_3	2	19	female	5	36	d	DV_237_C2_297.bmp	d	4010
SG_MatchingHamood_14_V1_3	2	19	female	5	37	d	DV_154_C2_042.bmp	d	1543
SG_MatchingHamood_14_V1_3	2	19	female	5	38	d	DV_132_C2_168.bmp	s	1337
SG_MatchingHamood_14_V1_3	2	19	female	5	39	s	C2_294_DV_294.bmp	s	1225
SG_MatchingHamood_14_V1_3	2	19	female	5	40	s	C2_256_DV_256.bmp	s	1286
SG_MatchingHamood_14_V1_4	2	19	female	1	1	s	C2_056_DV_056.bmp	s	854
SG_MatchingHamood_14_V1_4	2	19	female	1	2	s	C2_016_DV_016.bmp	s	954
SG_MatchingHamood_14_V1_4	2	19	female	1	3	s	C2_034_DV_034.bmp	s	945
SG_MatchingHamood_14_V1_4	2	19	female	1	4	s	C2_043_DV_043.bmp	s	914
SG_MatchingHamood_14_V1_4	2	19	female	1	5	s	C2_005_DV_005.bmp	s	860
SG_MatchingHamood_14_V1_4	2	19	female	1	6	s	DV_015_C2_015.bmp	s	1125
SG_MatchingHamood_14_V1_4	2	19	female	1	7	s	DV_062_C2_062.bmp	s	943
SG_MatchingHamood_14_V1_4	2	19	female	1	8	d	C2_010_DV_303.bmp	d	6295
SG_MatchingHamood_14_V1_4	2	19	female	1	9	s	C2_007_DV_007.bmp	s	1210
SG_MatchingHamood_14_V1_4	2	19	female	1	10	d	C2_004_DV_293.bmp	d	3488
SG_MatchingHamood_14_V1_4	2	19	female	1	11	s	DV_046_C2_046.bmp	s	1306
SG_MatchingHamood_14_V1_4	2	19	female	1	12	d	C2_018_DV_019.bmp	d	1285
SG_MatchingHamood_14_V1_4	2	19	female	1	13	s	C2_014_DV_014.bmp	s	1424
SG_MatchingHamood_14_V1_4	2	19	female	1	14	s	C2_031_DV_031.bmp	s	1453
SG_MatchingHamood_14_V1_4	2	19	female	1	15	s	DV_029_C2_029.bmp	s	1424
SG_MatchingHamood_14_V1_4	2	19	female	1	16	d	C2_050_DV_215.bmp	s	2470
SG_MatchingHamood_14_V1_4	2	19	female	1	17	s	C2_054_DV_054.bmp	s	1545
SG_MatchingHamood_14_V1_4	2	19	female	1	18	d	DV_129_C2_092.bmp	s	1690
SG_MatchingHamood_14_V1_4	2	19	female	1	19	s	C2_061_DV_061.bmp	s	892
SG_MatchingHamood_14_V1_4	2	19	female	1	20	d	C2_051_DV_238.bmp	d	1383
SG_MatchingHamood_14_V1_4	2	19	female	1	21	d	C2_009_DV_033.bmp	d	3485
SG_MatchingHamood_14_V1_4	2	19	female	1	22	d	C2_024_DV_030.bmp	s	5120
SG_MatchingHamood_14_V1_4	2	19	female	1	23	s	C2_040_DV_040.bmp	s	1209
SG_MatchingHamood_14_V1_4	2	19	female	1	24	d	C2_041_DV_044.bmp	d	2728
SG_MatchingHamood_14_V1_4	2	19	female	1	25	d	C2_033_DV_180.bmp	s	2728
SG_MatchingHamood_14_V1_4	2	19	female	1	26	d	C2_021_DV_087.bmp	s	2441
SG_MatchingHamood_14_V1_4	2	19	female	1	27	s	C2_025_DV_025.bmp	s	2980
SG_MatchingHamood_14_V1_4	2	19	female	1	28	d	C2_261_DV_201.bmp	d	6260
SG_MatchingHamood_14_V1_4	2	19	female	1	29	d	DV_303_C2_217.bmp	d	2991
SG_MatchingHamood_14_V1_4	2	19	female	1	30	s	C2_035_DV_035.bmp	s	6270
SG_MatchingHamood_14_V1_4	2	19	female	1	31	s	C2_017_DV_017.bmp	s	1866
SG_MatchingHamood_14_V1_4	2	19	female	1	32	d	C2_037_DV_085.bmp	d	2909
SG_MatchingHamood_14_V1_4	2	19	female	1	33	s	C2_036_DV_036.bmp	s	3527
SG_MatchingHamood_14_V1_4	2	19	female	1	34	d	C2_011_DV_049.bmp	s	1705
SG_MatchingHamood_14_V1_4	2	19	female	1	35	d	C2_007_DV_097.bmp	d	1635
SG_MatchingHamood_14_V1_4	2	19	female	1	36	d	C2_038_DV_081.bmp	d	1495
SG_MatchingHamood_14_V1_4	2	19	female	1	37	d	C2_012_DV_205.bmp	d	1321
SG_MatchingHamood_14_V1_4	2	19	female	1	38	d	C2_039_DV_072.bmp	s	2627
SG_MatchingHamood_14_V1_4	2	19	female	1	39	d	C2_023_DV_304.bmp	s	2560
SG_MatchingHamood_14_V1_4	2	19	female	1	40	s	C2_028_DV_028.bmp	s	1257
SG_MatchingHamood_14_V1_4	2	19	female	2	1	d	C2_123_DV_223.bmp	s	1313
SG_MatchingHamood_14_V1_4	2	19	female	2	2	s	C2_102_DV_102.bmp	s	1244
SG_MatchingHamood_14_V1_4	2	19	female	2	3	d	C2_218_DV_109.bmp	s	1304
SG_MatchingHamood_14_V1_4	2	19	female	2	4	s	DV_086_C2_086.bmp	s	1010
SG_MatchingHamood_14_V1_4	2	19	female	2	5	s	C2_082_DV_082.bmp	s	718
SG_MatchingHamood_14_V1_4	2	19	female	2	6	d	C2_098_DV_024.bmp	d	2913
SG_MatchingHamood_14_V1_4	2	19	female	2	7	s	C2_063_DV_063.bmp	s	747
SG_MatchingHamood_14_V1_4	2	19	female	2	8	d	C2_171_DV_185.bmp	s	1099
SG_MatchingHamood_14_V1_4	2	19	female	2	9	d	C2_206_DV_077.bmp	d	1773
SG_MatchingHamood_14_V1_4	2	19	female	2	10	d	C2_095_DV_229.bmp	s	1269
SG_MatchingHamood_14_V1_4	2	19	female	2	11	s	C2_065_DV_065.bmp	s	727
SG_MatchingHamood_14_V1_4	2	19	female	2	12	d	C2_108_DV_282.bmp	s	2096
SG_MatchingHamood_14_V1_4	2	19	female	2	13	s	DV_103_C2_103.bmp	s	2507
SG_MatchingHamood_14_V1_4	2	19	female	2	14	s	C2_069_DV_069.bmp	s	2468
SG_MatchingHamood_14_V1_4	2	19	female	2	15	s	DV_100_C2_100.bmp	s	743
SG_MatchingHamood_14_V1_4	2	19	female	2	16	d	C2_174_DV_183.bmp	d	1855
SG_MatchingHamood_14_V1_4	2	19	female	2	17	s	C2_071_DV_071.bmp	s	1122
SG_MatchingHamood_14_V1_4	2	19	female	2	18	d	C2_091_DV_283.bmp	d	1772
SG_MatchingHamood_14_V1_4	2	19	female	2	19	s	DV_089_C2_089.bmp	d	2436
SG_MatchingHamood_14_V1_4	2	19	female	2	20	s	C2_073_DV_073.bmp	s	1137
SG_MatchingHamood_14_V1_4	2	19	female	2	21	d	C2_055_DV_059.bmp	s	833
SG_MatchingHamood_14_V1_4	2	19	female	2	22	d	C2_070_DV_012.bmp	d	6333
SG_MatchingHamood_14_V1_4	2	19	female	2	23	s	C2_084_DV_084.bmp	s	1478
SG_MatchingHamood_14_V1_4	2	19	female	2	24	s	C2_101_DV_101.bmp	s	3090
SG_MatchingHamood_14_V1_4	2	19	female	2	25	s	C2_079_DV_079.bmp	s	1356
SG_MatchingHamood_14_V1_4	2	19	female	2	26	d	C2_143_DV_254.bmp	s	1357
SG_MatchingHamood_14_V1_4	2	19	female	2	27	d	C2_002_DV_041.bmp	s	3900
SG_MatchingHamood_14_V1_4	2	19	female	2	28	d	C2_139_DV_120.bmp	d	1839
SG_MatchingHamood_14_V1_4	2	19	female	2	29	d	C2_057_DV_067.bmp	d	1539
SG_MatchingHamood_14_V1_4	2	19	female	2	30	s	C2_080_DV_080.bmp	s	1387
SG_MatchingHamood_14_V1_4	2	19	female	2	31	s	DV_104_C2_104.bmp	s	9714
SG_MatchingHamood_14_V1_4	2	19	female	2	32	s	C2_068_DV_068.bmp	s	1084
SG_MatchingHamood_14_V1_4	2	19	female	2	33	s	C2_066_DV_066.bmp	s	1317
SG_MatchingHamood_14_V1_4	2	19	female	2	34	d	C2_211_DV_128.bmp	s	2104
SG_MatchingHamood_14_V1_4	2	19	female	2	35	d	C2_117_DV_219.bmp	d	14169
SG_MatchingHamood_14_V1_4	2	19	female	2	36	d	C2_076_DV_051.bmp	d	1210
SG_MatchingHamood_14_V1_4	2	19	female	2	37	s	C2_078_DV_078.bmp	s	1055
SG_MatchingHamood_14_V1_4	2	19	female	2	38	d	C2_092_DV_227.bmp	d	1315
SG_MatchingHamood_14_V1_4	2	19	female	2	39	s	DV_064_C2_064.bmp	s	1188
SG_MatchingHamood_14_V1_4	2	19	female	2	40	d	C2_182_DV_184.bmp	d	3435
SG_MatchingHamood_14_V1_4	2	19	female	3	1	s	C2_112_DV_112.bmp	s	1152
SG_MatchingHamood_14_V1_4	2	19	female	3	2	s	C2_134_DV_134.bmp	s	1784
SG_MatchingHamood_14_V1_4	2	19	female	3	3	s	C2_124_DV_124.bmp	s	903
SG_MatchingHamood_14_V1_4	2	19	female	3	4	s	DV_127_C2_127.bmp	s	680
SG_MatchingHamood_14_V1_4	2	19	female	3	5	s	C2_140_DV_140.bmp	s	819
SG_MatchingHamood_14_V1_4	2	19	female	3	6	s	DV_137_C2_137.bmp	s	1120
SG_MatchingHamood_14_V1_4	2	19	female	3	7	s	C2_113_DV_113.bmp	s	1106
SG_MatchingHamood_14_V1_4	2	19	female	3	8	d	C2_242_DV_246.bmp	s	2396
SG_MatchingHamood_14_V1_4	2	19	female	3	9	d	C2_239_DV_114.bmp	s	1298
SG_MatchingHamood_14_V1_4	2	19	female	3	10	d	C2_289_DV_039.bmp	d	3635
SG_MatchingHamood_14_V1_4	2	19	female	3	11	s	DV_111_C2_111.bmp	s	1342
SG_MatchingHamood_14_V1_4	2	19	female	3	12	s	DV_147_C2_147.bmp	s	1793
SG_MatchingHamood_14_V1_4	2	19	female	3	13	d	C2_240_DV_044.bmp	s	2736
SG_MatchingHamood_14_V1_4	2	19	female	3	14	d	C2_223_DV_242.bmp	s	2319
SG_MatchingHamood_14_V1_4	2	19	female	3	15	d	DV_024_C2_085.bmp	d	1841
SG_MatchingHamood_14_V1_4	2	19	female	3	16	d	DV_020_C2_090.bmp	d	1510
SG_MatchingHamood_14_V1_4	2	19	female	3	17	d	C2_261_DV_287.bmp	d	1320
SG_MatchingHamood_14_V1_4	2	19	female	3	18	d	C2_266_DV_227.bmp	d	1209
SG_MatchingHamood_14_V1_4	2	19	female	3	19	d	DV_013_C2_235.bmp	d	2742
SG_MatchingHamood_14_V1_4	2	19	female	3	20	s	C2_152_DV_152.bmp	d	3544
SG_MatchingHamood_14_V1_4	2	19	female	3	21	s	C2_142_DV_142.bmp	s	1384
SG_MatchingHamood_14_V1_4	2	19	female	3	22	s	DV_118_C2_118.bmp	s	1071
SG_MatchingHamood_14_V1_4	2	19	female	3	23	s	C2_115_DV_115.bmp	s	994
SG_MatchingHamood_14_V1_4	2	19	female	3	24	s	C2_131_DV_131.bmp	s	1713
SG_MatchingHamood_14_V1_4	2	19	female	3	25	d	C2_003_DV_018.bmp	d	1258
SG_MatchingHamood_14_V1_4	2	19	female	3	26	d	DV_012_C2_205.bmp	d	1214
SG_MatchingHamood_14_V1_4	2	19	female	3	27	d	C2_252_DV_125.bmp	d	1172
SG_MatchingHamood_14_V1_4	2	19	female	3	28	d	C2_232_DV_048.bmp	s	1211
SG_MatchingHamood_14_V1_4	2	19	female	3	29	d	DV_032_C2_153.bmp	s	672
SG_MatchingHamood_14_V1_4	2	19	female	3	30	d	C2_249_DV_083.bmp	d	2434
SG_MatchingHamood_14_V1_4	2	19	female	3	31	s	C2_119_DV_119.bmp	s	1328
SG_MatchingHamood_14_V1_4	2	19	female	3	32	d	C2_304_DV_099.bmp	d	1688
SG_MatchingHamood_14_V1_4	2	19	female	3	33	s	DV_141_C2_141.bmp	d	2932
SG_MatchingHamood_14_V1_4	2	19	female	3	34	s	C2_146_DV_146.bmp	s	1212
SG_MatchingHamood_14_V1_4	2	19	female	3	35	d	DV_009_C2_180.bmp	d	1951
SG_MatchingHamood_14_V1_4	2	19	female	3	36	d	C2_246_DV_160.bmp	d	2642
SG_MatchingHamood_14_V1_4	2	19	female	3	37	s	C2_144_DV_144.bmp	s	2599
SG_MatchingHamood_14_V1_4	2	19	female	3	38	d	DV_037_C2_303.bmp	s	1203
SG_MatchingHamood_14_V1_4	2	19	female	3	39	s	C2_116_DV_116.bmp	s	890
SG_MatchingHamood_14_V1_4	2	19	female	3	40	s	C2_105_DV_105.bmp	s	764
SG_MatchingHamood_14_V1_4	2	19	female	4	1	d	DV_120_C2_133.bmp	s	4636
SG_MatchingHamood_14_V1_4	2	19	female	4	2	d	DV_081_C2_282.bmp	d	1913
SG_MatchingHamood_14_V1_4	2	19	female	4	3	s	DV_166_C2_166.bmp	s	1458
SG_MatchingHamood_14_V1_4	2	19	female	4	4	d	DV_129_C2_199.bmp	d	2013
SG_MatchingHamood_14_V1_4	2	19	female	4	5	s	DV_161_C2_161.bmp	s	1300
SG_MatchingHamood_14_V1_4	2	19	female	4	6	s	C2_172_DV_172.bmp	d	3197
SG_MatchingHamood_14_V1_4	2	19	female	4	7	d	DV_160_C2_154.bmp	d	1115
SG_MatchingHamood_14_V1_4	2	19	female	4	8	s	C2_243_DV_243.bmp	s	1829
SG_MatchingHamood_14_V1_4	2	19	female	4	9	s	C2_155_DV_155.bmp	s	1929
SG_MatchingHamood_14_V1_4	2	19	female	4	10	d	DV_074_C2_075.bmp	s	1314
SG_MatchingHamood_14_V1_4	2	19	female	4	11	s	DV_231_C2_231.bmp	s	1003
SG_MatchingHamood_14_V1_4	2	19	female	4	12	s	DV_214_C2_214.bmp	s	2242
SG_MatchingHamood_14_V1_4	2	19	female	4	13	s	C2_158_DV_158.bmp	s	1422
SG_MatchingHamood_14_V1_4	2	19	female	4	14	s	C2_207_DV_207.bmp	s	1395
SG_MatchingHamood_14_V1_4	2	19	female	4	15	s	DV_190_C2_190.bmp	s	1049
SG_MatchingHamood_14_V1_4	2	19	female	4	16	s	C2_157_DV_157.bmp	s	1797
SG_MatchingHamood_14_V1_4	2	19	female	4	17	d	DV_094_C2_022.bmp	d	1379
SG_MatchingHamood_14_V1_4	2	19	female	4	18	s	DV_222_C2_222.bmp	s	1657
SG_MatchingHamood_14_V1_4	2	19	female	4	19	d	DV_108_C2_038.bmp	s	1334
SG_MatchingHamood_14_V1_4	2	19	female	4	20	d	DV_114_C2_126.bmp	d	2183
SG_MatchingHamood_14_V1_4	2	19	female	4	21	d	DV_178_C2_060.bmp	d	1437
SG_MatchingHamood_14_V1_4	2	19	female	4	22	s	C2_226_DV_226.bmp	s	1186
SG_MatchingHamood_14_V1_4	2	19	female	4	23	s	C2_247_DV_247.bmp	s	1073
SG_MatchingHamood_14_V1_4	2	19	female	4	24	s	DV_204_C2_204.bmp	s	1133
SG_MatchingHamood_14_V1_4	2	19	female	4	25	s	DV_167_C2_167.bmp	s	941
SG_MatchingHamood_14_V1_4	2	19	female	4	26	s	DV_248_C2_248.bmp	s	1110
SG_MatchingHamood_14_V1_4	2	19	female	4	27	d	DV_130_C2_253.bmp	d	1288
SG_MatchingHamood_14_V1_4	2	19	female	4	28	s	C2_181_Dv_181.bmp	s	1794
SG_MatchingHamood_14_V1_4	2	19	female	4	29	d	DV_039_C2_296.bmp	d	1375
SG_MatchingHamood_14_V1_4	2	19	female	4	30	d	DV_132_C2_210.bmp	d	3407
SG_MatchingHamood_14_V1_4	2	19	female	4	31	s	DV_200_C2_200.bmp	s	1166
SG_MatchingHamood_14_V1_4	2	19	female	4	32	d	DV_091_C2_211.bmp	d	1726
SG_MatchingHamood_14_V1_4	2	19	female	4	33	s	C2_194_DV_194.bmp	s	895
SG_MatchingHamood_14_V1_4	2	19	female	4	34	d	DV_048_C2_175.bmp	d	3632
SG_MatchingHamood_14_V1_4	2	19	female	4	35	d	DV_109_C2_268.bmp	d	1772
SG_MatchingHamood_14_V1_4	2	19	female	4	36	d	DV_045_C2_027.bmp	s	2485
SG_MatchingHamood_14_V1_4	2	19	female	4	37	d	DV_088_C2_295.bmp	d	1567
SG_MatchingHamood_14_V1_4	2	19	female	4	38	d	DV_053_C2_208.bmp	d	2078
SG_MatchingHamood_14_V1_4	2	19	female	4	39	d	DV_052_C2_264.bmp	d	3336
SG_MatchingHamood_14_V1_4	2	19	female	4	40	d	DV_126_C2_076.bmp	d	4018
SG_MatchingHamood_14_V1_4	2	19	female	5	1	s	DV_299_C2_299.bmp	d	1983
SG_MatchingHamood_14_V1_4	2	19	female	5	2	d	DV_277_C2_110.bmp	d	4877
SG_MatchingHamood_14_V1_4	2	19	female	5	3	s	C2_256_DV_256.bmp	s	961
SG_MatchingHamood_14_V1_4	2	19	female	5	4	s	DV_284_C2_284.bmp	s	864
SG_MatchingHamood_14_V1_4	2	19	female	5	5	s	C2_258_DV_258.bmp	s	787
SG_MatchingHamood_14_V1_4	2	19	female	5	6	d	DV_178_C2_099.bmp	d	2041
SG_MatchingHamood_14_V1_4	2	19	female	5	7	d	DV_238_C2_218.bmp	d	1549
SG_MatchingHamood_14_V1_4	2	19	female	5	8	s	DV_300_C2_300.bmp	s	1238
SG_MatchingHamood_14_V1_4	2	19	female	5	9	d	DV_133_C2_139.bmp	d	4083
SG_MatchingHamood_14_V1_4	2	19	female	5	10	s	C2_291_DV_291.bmp	s	1654
SG_MatchingHamood_14_V1_4	2	19	female	5	11	d	DV_199_C2_125.bmp	s	1625
SG_MatchingHamood_14_V1_4	2	19	female	5	12	d	DV_219_C2_135.bmp	d	1295
SG_MatchingHamood_14_V1_4	2	19	female	5	13	s	DV_286_C2_286.bmp	s	1122
SG_MatchingHamood_14_V1_4	2	19	female	5	14	s	C2_294_DV_294.bmp	s	1155
SG_MatchingHamood_14_V1_4	2	19	female	5	15	s	DV_274_C2_274.bmp	s	1388
SG_MatchingHamood_14_V1_4	2	19	female	5	16	s	C2_257_DV_257.bmp	s	1345
SG_MatchingHamood_14_V1_4	2	19	female	5	17	s	C2_288_DV_288.bmp	s	1473
SG_MatchingHamood_14_V1_4	2	19	female	5	18	s	C2_271_DV_271.bmp	s	1510
SG_MatchingHamood_14_V1_4	2	19	female	5	19	d	DV_132_C2_168.bmp	d	2606
SG_MatchingHamood_14_V1_4	2	19	female	5	20	d	DV_170_C2_270.bmp	d	5852
SG_MatchingHamood_14_V1_4	2	19	female	5	21	s	DV_259_C2_259.bmp	s	1969
SG_MatchingHamood_14_V1_4	2	19	female	5	22	d	DV_295_C2_216.bmp	s	6633
SG_MatchingHamood_14_V1_4	2	19	female	5	23	s	DV_265_C2_265.bmp	s	1388
SG_MatchingHamood_14_V1_4	2	19	female	5	24	d	DV_296_C2_235.bmp	s	3044
SG_MatchingHamood_14_V1_4	2	19	female	5	25	d	DV_208_C2_183.bmp	d	4544
SG_MatchingHamood_14_V1_4	2	19	female	5	26	d	C2_008_DV_039.bmp	s	1479
SG_MatchingHamood_14_V1_4	2	19	female	5	27	d	DV_244_C2_042.bmp	d	1627
SG_MatchingHamood_14_V1_4	2	19	female	5	28	d	DV_154_C2_042.bmp	d	1320
SG_MatchingHamood_14_V1_4	2	19	female	5	29	s	DV_267_C2_267.bmp	s	1814
SG_MatchingHamood_14_V1_4	2	19	female	5	30	d	DV_254_C2_287.bmp	d	1373
SG_MatchingHamood_14_V1_4	2	19	female	5	31	s	C2_290_DV_290.bmp	s	1590
SG_MatchingHamood_14_V1_4	2	19	female	5	32	d	C2_083_DV_108.bmp	d	2101
SG_MatchingHamood_14_V1_4	2	19	female	5	33	s	C2_302_DV_302.bmp	s	1540
SG_MatchingHamood_14_V1_4	2	19	female	5	34	s	C2_278_DV_278.bmp	s	1063
SG_MatchingHamood_14_V1_4	2	19	female	5	35	d	DV_203_C2_277.bmp	d	1539
SG_MatchingHamood_14_V1_4	2	19	female	5	36	s	DV_298_C2_298.bmp	s	1273
SG_MatchingHamood_14_V1_4	2	19	female	5	37	d	DV_280_C2_003.bmp	s	1294
SG_MatchingHamood_14_V1_4	2	19	female	5	38	s	C2_260_DV_260.bmp	s	1200
SG_MatchingHamood_14_V1_4	2	19	female	5	39	d	DV_237_C2_297.bmp	d	2430
SG_MatchingHamood_14_V1_4	2	19	female	5	40	d	DV_217_C2_185.bmp	d	4667
SG_MatchingHamood_14_V1_5	2	19	female	1	1	s	C2_040_DV_040.bmp	s	1115
SG_MatchingHamood_14_V1_5	2	19	female	1	2	s	C2_016_DV_016.bmp	s	908
SG_MatchingHamood_14_V1_5	2	19	female	1	3	d	C2_009_DV_033.bmp	s	1287
SG_MatchingHamood_14_V1_5	2	19	female	1	4	d	C2_023_DV_304.bmp	s	1264
SG_MatchingHamood_14_V1_5	2	19	female	1	5	s	DV_046_C2_046.bmp	s	996
SG_MatchingHamood_14_V1_5	2	19	female	1	6	d	C2_021_DV_087.bmp	s	1018
SG_MatchingHamood_14_V1_5	2	19	female	1	7	d	C2_038_DV_081.bmp	d	3528
SG_MatchingHamood_14_V1_5	2	19	female	1	8	d	C2_011_DV_049.bmp	s	984
SG_MatchingHamood_14_V1_5	2	19	female	1	9	d	C2_037_DV_085.bmp	s	2135
SG_MatchingHamood_14_V1_5	2	19	female	1	10	s	C2_036_DV_036.bmp	s	1040
SG_MatchingHamood_14_V1_5	2	19	female	1	11	d	C2_039_DV_072.bmp	d	1932
SG_MatchingHamood_14_V1_5	2	19	female	1	12	d	C2_007_DV_097.bmp	s	9285
SG_MatchingHamood_14_V1_5	2	19	female	1	13	s	C2_031_DV_031.bmp	s	3071
SG_MatchingHamood_14_V1_5	2	19	female	1	14	s	C2_028_DV_028.bmp	s	964
SG_MatchingHamood_14_V1_5	2	19	female	1	15	s	C2_056_DV_056.bmp	s	731
SG_MatchingHamood_14_V1_5	2	19	female	1	16	d	C2_010_DV_303.bmp	s	1195
SG_MatchingHamood_14_V1_5	2	19	female	1	17	d	DV_303_C2_217.bmp	s	1001
SG_MatchingHamood_14_V1_5	2	19	female	1	18	s	DV_029_C2_029.bmp	s	504
SG_MatchingHamood_14_V1_5	2	19	female	1	19	d	C2_033_DV_180.bmp	s	897
SG_MatchingHamood_14_V1_5	2	19	female	1	20	s	C2_035_DV_035.bmp	s	915
SG_MatchingHamood_14_V1_5	2	19	female	1	21	s	C2_061_DV_061.bmp	s	708
SG_MatchingHamood_14_V1_5	2	19	female	1	22	s	C2_007_DV_007.bmp	s	1230
SG_MatchingHamood_14_V1_5	2	19	female	1	23	s	DV_015_C2_015.bmp	s	1315
SG_MatchingHamood_14_V1_5	2	19	female	1	24	d	C2_050_DV_215.bmp	s	4284
SG_MatchingHamood_14_V1_5	2	19	female	1	25	s	C2_005_DV_005.bmp	s	1087
SG_MatchingHamood_14_V1_5	2	19	female	1	26	d	C2_004_DV_293.bmp	d	3691
SG_MatchingHamood_14_V1_5	2	19	female	1	27	s	C2_043_DV_043.bmp	s	1269
SG_MatchingHamood_14_V1_5	2	19	female	1	28	s	DV_062_C2_062.bmp	s	1143
SG_MatchingHamood_14_V1_5	2	19	female	1	29	d	C2_261_DV_201.bmp	d	2936
SG_MatchingHamood_14_V1_5	2	19	female	1	30	d	C2_051_DV_238.bmp	d	1320
SG_MatchingHamood_14_V1_5	2	19	female	1	31	s	C2_025_DV_025.bmp	s	3785
SG_MatchingHamood_14_V1_5	2	19	female	1	32	s	C2_017_DV_017.bmp	s	943
SG_MatchingHamood_14_V1_5	2	19	female	1	33	d	C2_024_DV_030.bmp	d	2935
SG_MatchingHamood_14_V1_5	2	19	female	1	34	s	C2_014_DV_014.bmp	s	1431
SG_MatchingHamood_14_V1_5	2	19	female	1	35	d	DV_129_C2_092.bmp	s	1268
SG_MatchingHamood_14_V1_5	2	19	female	1	36	s	C2_034_DV_034.bmp	s	1143
SG_MatchingHamood_14_V1_5	2	19	female	1	37	s	C2_054_DV_054.bmp	s	3958
SG_MatchingHamood_14_V1_5	2	19	female	1	38	d	C2_041_DV_044.bmp	d	2702
SG_MatchingHamood_14_V1_5	2	19	female	1	39	d	C2_012_DV_205.bmp	s	1649
SG_MatchingHamood_14_V1_5	2	19	female	1	40	d	C2_018_DV_019.bmp	s	1139
SG_MatchingHamood_14_V1_5	2	19	female	2	1	d	C2_117_DV_219.bmp	d	1876
SG_MatchingHamood_14_V1_5	2	19	female	2	2	s	DV_086_C2_086.bmp	s	2063
SG_MatchingHamood_14_V1_5	2	19	female	2	3	s	DV_104_C2_104.bmp	s	7418
SG_MatchingHamood_14_V1_5	2	19	female	2	4	d	C2_174_DV_183.bmp	s	1440
SG_MatchingHamood_14_V1_5	2	19	female	2	5	s	DV_100_C2_100.bmp	s	1133
SG_MatchingHamood_14_V1_5	2	19	female	2	6	d	C2_108_DV_282.bmp	d	2068
SG_MatchingHamood_14_V1_5	2	19	female	2	7	s	DV_089_C2_089.bmp	s	1625
SG_MatchingHamood_14_V1_5	2	19	female	2	8	d	C2_091_DV_283.bmp	d	1926
SG_MatchingHamood_14_V1_5	2	19	female	2	9	s	C2_068_DV_068.bmp	s	1183
SG_MatchingHamood_14_V1_5	2	19	female	2	10	d	C2_055_DV_059.bmp	s	2974
SG_MatchingHamood_14_V1_5	2	19	female	2	11	d	C2_206_DV_077.bmp	d	1461
SG_MatchingHamood_14_V1_5	2	19	female	2	12	s	C2_102_DV_102.bmp	s	1064
SG_MatchingHamood_14_V1_5	2	19	female	2	13	d	C2_182_DV_184.bmp	d	3218
SG_MatchingHamood_14_V1_5	2	19	female	2	14	s	C2_066_DV_066.bmp	s	1120
SG_MatchingHamood_14_V1_5	2	19	female	2	15	d	C2_211_DV_128.bmp	d	2097
SG_MatchingHamood_14_V1_5	2	19	female	2	16	d	C2_076_DV_051.bmp	d	3386
SG_MatchingHamood_14_V1_5	2	19	female	2	17	d	C2_002_DV_041.bmp	s	1027
SG_MatchingHamood_14_V1_5	2	19	female	2	18	s	C2_101_DV_101.bmp	s	2303
SG_MatchingHamood_14_V1_5	2	19	female	2	19	s	C2_069_DV_069.bmp	s	880
SG_MatchingHamood_14_V1_5	2	19	female	2	20	s	DV_064_C2_064.bmp	s	923
SG_MatchingHamood_14_V1_5	2	19	female	2	21	d	C2_092_DV_227.bmp	s	6756
SG_MatchingHamood_14_V1_5	2	19	female	2	22	d	C2_171_DV_185.bmp	s	1021
SG_MatchingHamood_14_V1_5	2	19	female	2	23	s	C2_073_DV_073.bmp	s	1362
SG_MatchingHamood_14_V1_5	2	19	female	2	24	d	C2_123_DV_223.bmp	s	1562
SG_MatchingHamood_14_V1_5	2	19	female	2	25	d	C2_098_DV_024.bmp	d	2257
SG_MatchingHamood_14_V1_5	2	19	female	2	26	d	C2_057_DV_067.bmp	d	3020
SG_MatchingHamood_14_V1_5	2	19	female	2	27	s	C2_080_DV_080.bmp	s	1378
SG_MatchingHamood_14_V1_5	2	19	female	2	28	s	C2_063_DV_063.bmp	s	3656
SG_MatchingHamood_14_V1_5	2	19	female	2	29	s	C2_065_DV_065.bmp	s	1077
SG_MatchingHamood_14_V1_5	2	19	female	2	30	d	C2_143_DV_254.bmp	s	4054
SG_MatchingHamood_14_V1_5	2	19	female	2	31	s	C2_082_DV_082.bmp	s	954
SG_MatchingHamood_14_V1_5	2	19	female	2	32	s	C2_071_DV_071.bmp	s	1332
SG_MatchingHamood_14_V1_5	2	19	female	2	33	s	DV_103_C2_103.bmp	s	995
SG_MatchingHamood_14_V1_5	2	19	female	2	34	d	C2_218_DV_109.bmp	d	2179
SG_MatchingHamood_14_V1_5	2	19	female	2	35	d	C2_070_DV_012.bmp	d	1512
SG_MatchingHamood_14_V1_5	2	19	female	2	36	d	C2_095_DV_229.bmp	s	930
SG_MatchingHamood_14_V1_5	2	19	female	2	37	s	C2_079_DV_079.bmp	s	898
SG_MatchingHamood_14_V1_5	2	19	female	2	38	s	C2_078_DV_078.bmp	s	980
SG_MatchingHamood_14_V1_5	2	19	female	2	39	d	C2_139_DV_120.bmp	d	1433
SG_MatchingHamood_14_V1_5	2	19	female	2	40	s	C2_084_DV_084.bmp	s	2497
SG_MatchingHamood_14_V1_5	2	19	female	3	1	s	C2_112_DV_112.bmp	s	1193
SG_MatchingHamood_14_V1_5	2	19	female	3	2	d	C2_252_DV_125.bmp	d	1119
SG_MatchingHamood_14_V1_5	2	19	female	3	3	s	DV_118_C2_118.bmp	s	1800
SG_MatchingHamood_14_V1_5	2	19	female	3	4	d	C2_266_DV_227.bmp	d	2079
SG_MatchingHamood_14_V1_5	2	19	female	3	5	s	C2_105_DV_105.bmp	s	4552
SG_MatchingHamood_14_V1_5	2	19	female	3	6	s	C2_116_DV_116.bmp	s	2418
SG_MatchingHamood_14_V1_5	2	19	female	3	7	s	C2_142_DV_142.bmp	s	5230
SG_MatchingHamood_14_V1_5	2	19	female	3	8	d	DV_024_C2_085.bmp	d	2789
SG_MatchingHamood_14_V1_5	2	19	female	3	9	d	C2_003_DV_018.bmp	d	4970
SG_MatchingHamood_14_V1_5	2	19	female	3	10	s	C2_131_DV_131.bmp	s	2466
SG_MatchingHamood_14_V1_5	2	19	female	3	11	s	C2_119_DV_119.bmp	s	1486
SG_MatchingHamood_14_V1_5	2	19	female	3	12	s	C2_115_DV_115.bmp	s	1912
SG_MatchingHamood_14_V1_5	2	19	female	3	13	s	DV_111_C2_111.bmp	s	3650
SG_MatchingHamood_14_V1_5	2	19	female	3	14	d	C2_246_DV_160.bmp	d	12069
SG_MatchingHamood_14_V1_5	2	19	female	3	15	d	DV_009_C2_180.bmp	d	1417
SG_MatchingHamood_14_V1_5	2	19	female	3	16	d	C2_289_DV_039.bmp	d	13615
SG_MatchingHamood_14_V1_5	2	19	female	3	17	d	C2_240_DV_044.bmp	s	2059
SG_MatchingHamood_14_V1_5	2	19	female	3	18	d	C2_304_DV_099.bmp	d	5623
SG_MatchingHamood_14_V1_5	2	19	female	3	19	d	C2_239_DV_114.bmp	s	3115
SG_MatchingHamood_14_V1_5	2	19	female	3	20	s	C2_124_DV_124.bmp	s	1013
SG_MatchingHamood_14_V1_5	2	19	female	3	21	s	C2_144_DV_144.bmp	s	8091
SG_MatchingHamood_14_V1_5	2	19	female	3	22	d	DV_020_C2_090.bmp	s	1221
SG_MatchingHamood_14_V1_5	2	19	female	3	23	s	DV_137_C2_137.bmp	s	3050
SG_MatchingHamood_14_V1_5	2	19	female	3	24	d	C2_249_DV_083.bmp	s	1542
SG_MatchingHamood_14_V1_5	2	19	female	3	25	s	C2_134_DV_134.bmp	s	1670
SG_MatchingHamood_14_V1_5	2	19	female	3	26	s	C2_152_DV_152.bmp	s	1106
SG_MatchingHamood_14_V1_5	2	19	female	3	27	d	C2_223_DV_242.bmp	s	3868
SG_MatchingHamood_14_V1_5	2	19	female	3	28	s	C2_140_DV_140.bmp	s	1263
SG_MatchingHamood_14_V1_5	2	19	female	3	29	s	C2_113_DV_113.bmp	s	1146
SG_MatchingHamood_14_V1_5	2	19	female	3	30	d	C2_261_DV_287.bmp	d	6922
SG_MatchingHamood_14_V1_5	2	19	female	3	31	s	DV_141_C2_141.bmp	s	3100
SG_MatchingHamood_14_V1_5	2	19	female	3	32	d	DV_037_C2_303.bmp	s	990
SG_MatchingHamood_14_V1_5	2	19	female	3	33	s	DV_127_C2_127.bmp	s	613
SG_MatchingHamood_14_V1_5	2	19	female	3	34	d	C2_242_DV_246.bmp	s	2490
SG_MatchingHamood_14_V1_5	2	19	female	3	35	d	C2_232_DV_048.bmp	d	1292
SG_MatchingHamood_14_V1_5	2	19	female	3	36	s	C2_146_DV_146.bmp	s	1152
SG_MatchingHamood_14_V1_5	2	19	female	3	37	d	DV_012_C2_205.bmp	d	2016
SG_MatchingHamood_14_V1_5	2	19	female	3	38	s	DV_147_C2_147.bmp	s	2734
SG_MatchingHamood_14_V1_5	2	19	female	3	39	d	DV_013_C2_235.bmp	d	1270
SG_MatchingHamood_14_V1_5	2	19	female	3	40	d	DV_032_C2_153.bmp	d	1489
SG_MatchingHamood_14_V1_5	2	19	female	4	1	d	DV_129_C2_199.bmp	d	1154
SG_MatchingHamood_14_V1_5	2	19	female	4	2	s	DV_200_C2_200.bmp	s	1308
SG_MatchingHamood_14_V1_5	2	19	female	4	3	s	C2_194_DV_194.bmp	s	2364
SG_MatchingHamood_14_V1_5	2	19	female	4	4	d	DV_094_C2_022.bmp	d	2531
SG_MatchingHamood_14_V1_5	2	19	female	4	5	d	DV_160_C2_154.bmp	d	1284
SG_MatchingHamood_14_V1_5	2	19	female	4	6	s	C2_157_DV_157.bmp	d	847
SG_MatchingHamood_14_V1_5	2	19	female	4	7	s	DV_190_C2_190.bmp	s	1178
SG_MatchingHamood_14_V1_5	2	19	female	4	8	s	DV_231_C2_231.bmp	s	899
SG_MatchingHamood_14_V1_5	2	19	female	4	9	d	DV_109_C2_268.bmp	d	1844
SG_MatchingHamood_14_V1_5	2	19	female	4	10	d	DV_039_C2_296.bmp	d	1191
SG_MatchingHamood_14_V1_5	2	19	female	4	11	s	DV_204_C2_204.bmp	d	1271
SG_MatchingHamood_14_V1_5	2	19	female	4	12	d	DV_088_C2_295.bmp	d	1203
SG_MatchingHamood_14_V1_5	2	19	female	4	13	s	C2_172_DV_172.bmp	s	1137
SG_MatchingHamood_14_V1_5	2	19	female	4	14	s	DV_222_C2_222.bmp	s	986
SG_MatchingHamood_14_V1_5	2	19	female	4	15	s	DV_214_C2_214.bmp	s	1528
SG_MatchingHamood_14_V1_5	2	19	female	4	16	d	DV_045_C2_027.bmp	d	1193
SG_MatchingHamood_14_V1_5	2	19	female	4	17	d	DV_120_C2_133.bmp	s	1479
SG_MatchingHamood_14_V1_5	2	19	female	4	18	s	DV_166_C2_166.bmp	s	1115
SG_MatchingHamood_14_V1_5	2	19	female	4	19	s	DV_161_C2_161.bmp	s	1035
SG_MatchingHamood_14_V1_5	2	19	female	4	20	d	DV_114_C2_126.bmp	d	1487
SG_MatchingHamood_14_V1_5	2	19	female	4	21	d	DV_130_C2_253.bmp	s	2154
SG_MatchingHamood_14_V1_5	2	19	female	4	22	s	C2_226_DV_226.bmp	s	978
SG_MatchingHamood_14_V1_5	2	19	female	4	23	s	C2_158_DV_158.bmp	s	1033
SG_MatchingHamood_14_V1_5	2	19	female	4	24	d	DV_052_C2_264.bmp	d	2628
SG_MatchingHamood_14_V1_5	2	19	female	4	25	d	DV_091_C2_211.bmp	d	1435
SG_MatchingHamood_14_V1_5	2	19	female	4	26	s	DV_167_C2_167.bmp	s	767
SG_MatchingHamood_14_V1_5	2	19	female	4	27	s	C2_243_DV_243.bmp	s	1215
SG_MatchingHamood_14_V1_5	2	19	female	4	28	d	DV_178_C2_060.bmp	d	2187
SG_MatchingHamood_14_V1_5	2	19	female	4	29	s	C2_181_Dv_181.bmp	s	3066
SG_MatchingHamood_14_V1_5	2	19	female	4	30	d	DV_074_C2_075.bmp	s	1037
SG_MatchingHamood_14_V1_5	2	19	female	4	31	d	DV_108_C2_038.bmp	s	1168
SG_MatchingHamood_14_V1_5	2	19	female	4	32	s	DV_248_C2_248.bmp	s	1098
SG_MatchingHamood_14_V1_5	2	19	female	4	33	s	C2_155_DV_155.bmp	s	1186
SG_MatchingHamood_14_V1_5	2	19	female	4	34	d	DV_053_C2_208.bmp	d	1704
SG_MatchingHamood_14_V1_5	2	19	female	4	35	d	DV_132_C2_210.bmp	d	1620
SG_MatchingHamood_14_V1_5	2	19	female	4	36	s	C2_207_DV_207.bmp	s	1208
SG_MatchingHamood_14_V1_5	2	19	female	4	37	d	DV_081_C2_282.bmp	d	1797
SG_MatchingHamood_14_V1_5	2	19	female	4	38	d	DV_048_C2_175.bmp	d	2324
SG_MatchingHamood_14_V1_5	2	19	female	4	39	d	DV_126_C2_076.bmp	d	1439
SG_MatchingHamood_14_V1_5	2	19	female	4	40	s	C2_247_DV_247.bmp	s	1306
SG_MatchingHamood_14_V1_5	2	19	female	5	1	s	DV_286_C2_286.bmp	s	1244
SG_MatchingHamood_14_V1_5	2	19	female	5	2	d	C2_083_DV_108.bmp	d	2000
SG_MatchingHamood_14_V1_5	2	19	female	5	3	s	C2_288_DV_288.bmp	d	3276
SG_MatchingHamood_14_V1_5	2	19	female	5	4	d	DV_208_C2_183.bmp	d	2209
SG_MatchingHamood_14_V1_5	2	19	female	5	5	s	DV_259_C2_259.bmp	s	1623
SG_MatchingHamood_14_V1_5	2	19	female	5	6	s	C2_291_DV_291.bmp	s	1692
SG_MatchingHamood_14_V1_5	2	19	female	5	7	d	DV_296_C2_235.bmp	s	6158
SG_MatchingHamood_14_V1_5	2	19	female	5	8	d	DV_154_C2_042.bmp	d	999
SG_MatchingHamood_14_V1_5	2	19	female	5	9	d	DV_133_C2_139.bmp	s	2388
SG_MatchingHamood_14_V1_5	2	19	female	5	10	s	DV_265_C2_265.bmp	d	2795
SG_MatchingHamood_14_V1_5	2	19	female	5	11	s	C2_258_DV_258.bmp	s	1041
SG_MatchingHamood_14_V1_5	2	19	female	5	12	s	DV_274_C2_274.bmp	s	901
SG_MatchingHamood_14_V1_5	2	19	female	5	13	d	DV_277_C2_110.bmp	d	2264
SG_MatchingHamood_14_V1_5	2	19	female	5	14	d	DV_238_C2_218.bmp	d	1370
SG_MatchingHamood_14_V1_5	2	19	female	5	15	s	C2_290_DV_290.bmp	s	1610
SG_MatchingHamood_14_V1_5	2	19	female	5	16	s	C2_260_DV_260.bmp	s	1415
SG_MatchingHamood_14_V1_5	2	19	female	5	17	s	DV_298_C2_298.bmp	s	1300
SG_MatchingHamood_14_V1_5	2	19	female	5	18	d	DV_244_C2_042.bmp	d	1592
SG_MatchingHamood_14_V1_5	2	19	female	5	19	d	DV_219_C2_135.bmp	d	6997
SG_MatchingHamood_14_V1_5	2	19	female	5	20	d	DV_254_C2_287.bmp	d	1659
SG_MatchingHamood_14_V1_5	2	19	female	5	21	d	DV_178_C2_099.bmp	s	2319
SG_MatchingHamood_14_V1_5	2	19	female	5	22	s	C2_302_DV_302.bmp	s	3631
SG_MatchingHamood_14_V1_5	2	19	female	5	23	d	DV_203_C2_277.bmp	d	2020
SG_MatchingHamood_14_V1_5	2	19	female	5	24	s	DV_267_C2_267.bmp	s	1418
SG_MatchingHamood_14_V1_5	2	19	female	5	25	d	C2_008_DV_039.bmp	d	1407
SG_MatchingHamood_14_V1_5	2	19	female	5	26	d	DV_199_C2_125.bmp	s	1886
SG_MatchingHamood_14_V1_5	2	19	female	5	27	s	DV_300_C2_300.bmp	s	953
SG_MatchingHamood_14_V1_5	2	19	female	5	28	s	C2_294_DV_294.bmp	s	786
SG_MatchingHamood_14_V1_5	2	19	female	5	29	d	DV_295_C2_216.bmp	d	1247
SG_MatchingHamood_14_V1_5	2	19	female	5	30	s	C2_271_DV_271.bmp	s	1002
SG_MatchingHamood_14_V1_5	2	19	female	5	31	s	C2_256_DV_256.bmp	s	1219
SG_MatchingHamood_14_V1_5	2	19	female	5	32	d	DV_132_C2_168.bmp	d	3624
SG_MatchingHamood_14_V1_5	2	19	female	5	33	s	C2_257_DV_257.bmp	s	1174
SG_MatchingHamood_14_V1_5	2	19	female	5	34	d	DV_217_C2_185.bmp	d	1268
SG_MatchingHamood_14_V1_5	2	19	female	5	35	s	C2_278_DV_278.bmp	s	1166
SG_MatchingHamood_14_V1_5	2	19	female	5	36	d	DV_280_C2_003.bmp	s	958
SG_MatchingHamood_14_V1_5	2	19	female	5	37	s	DV_299_C2_299.bmp	s	1686
SG_MatchingHamood_14_V1_5	2	19	female	5	38	d	DV_237_C2_297.bmp	s	2081
SG_MatchingHamood_14_V1_5	2	19	female	5	39	d	DV_170_C2_270.bmp	d	2370
[truncated: 23,001 more rows]
